# Supplementary material for: Altered ureido protein modification profiles in seminal plasma extracellular vesicles of non-normozoospermic men
Source: Front Endocrinol (Lausanne). 2023 Mar 22;14:1113824. doi: 10.3389/fendo.2023.1113824 (PMC10073716; doi:10.3389/fendo.2023.1113824)
Supplement: Supplementary file 2 [file Table_2.xlsx]

## Sheet: Citrullinated peptides
Altered ureido protein modifications profiles in seminal plasma extracellular vesicles of non-normozoospermic men
Rosa Roy1, Cristina Lorca 2,3, María Mulet 2,3, Jose Antonio Sánchez Milán 2, Alejandro Baratas 1, Moisés de la Casa 1,4, Carme Espinet 5, Aida Serra 2, 3,5*and Xavier Gallart-Palau 2, 6*
1 Department of Biology. Genetics Unit. Universidad Autónoma de Madrid. Cantoblanco, 28049, Madrid, Spain
2 Biomedical Research Institute of Lleida Dr. Pifarré Foundation (IRBLLEIDA) - +Pec Proteomics Research Group (+PPRG) - Neuroscience Area – University Hospital Arnau de Vilanova (HUAV), 80 Av. Rovira Roure, 25198, Lleida, Spain
3 IMDEA-Food Research Institute, Campus of International Excellence UAM+CSIC, Old Cantoblanco Hospital, 8 Crta. Canto Blanco, 28049, Madrid, Spain
4 GINEFIV, Assisted Reproduction Centre, Madrid, Spain
5 Department of Medical Basic Sciences, University of Lleida (UdL), 25198, Lleida, Spain
6 Department of Psychology, University of Lleida (UdL), 25001, Lleida, Spain
*Co-senior authorship & correspondence.
Dataset S1: List of citrullinated peptides (Cit) identified by iTraq-quantitative liquid chromatography tandem mass spectrometry in sEVs from NZ (NZ 1-3) and non-NZ (non-NZ 1-5). For every sEVs sample analyzed intensity and ratio iTraq calculated based on NZ1 is included.
									Intensity									Ratio iTraq
Protein Accession	Peptide	-10lgP	Quality Score	Mass	ppm	m/z	RT	#Feature	NZ1	NZ2	NZ3	non-NZ1	non-NZ2	non-NZ3	non-NZ4	non-NZ5		NZ1	NZ2	NZ3	nonNZ1	nonNZ2	nonNZ3	nonNZ4	nonNZ5	Start	End	PTM	AScore
Q02383|SEMG2_HUMAN	K.L(+304.20)QTSLHPAHQDR(+.98).L	48.07	10.54	1706.9	10.2	569.978	48.33	3	71100	74700	63100	59300	62100	64300	47800	54800		1	1.05	0.89	0.83	0.87	0.9	0.67	0.77	234	245	iTRAQ 8plex (K N-term); Citrullination	L1:iTRAQ 8plex (K N-term):1000.00;R12:Citrullination:1000.00
Q02383|SEMG2_HUMAN	K.G(+304.20)SFSIQHTYHVDINDHDWTR(+.98).K	47.32	10.18	2732.28	8.5	684.084	131.2	2	44900	41100	31300	40200	36600	45700	36100	28300		1	0.92	0.7	0.89	0.81	1.02	0.8	0.63	61	80	iTRAQ 8plex (K N-term); Citrullination	G1:iTRAQ 8plex (K N-term):1000.00;R20:Citrullination:1000.00
Q02383|SEMG2_HUMAN	K.G(+304.20)R(+.98)TQGGSQSSYVLQTEELVVNK(+304.20).Q	38.58	8.58	2988.59	10.8	748.162	146.51	1	5420	7460	4490	4780	5360	5560	5780	5480		1	1.38	0.83	0.88	0.99	1.03	1.07	1.01	184	205	iTRAQ 8plex (K N-term); Citrullination	G1:iTRAQ 8plex (K N-term):1000.00;R2:Citrullination:1000.00;K22:iTRAQ 8plex (K N-term):1000.00
Q02383|SEMG2_HUMAN	K.G(+304.20)R(+.98)TQGGSQSSY.V	26.09	6.23	1431.68	8.1	716.855	22.65	1	13200	11000	7900	6120	15600	15100	11300	7970		1	0.83	0.6	0.46	1.18	1.15	0.86	0.6	184	194	iTRAQ 8plex (K N-term); Citrullination	G1:iTRAQ 8plex (K N-term):1000.00;R2:Citrullination:1000.00
Q02383|SEMG2_HUMAN	K.G(+304.20)LSSQC(+58.01)SNTEK(+304.20)R(+.98).L	24.72	6.54	1976	10.4	659.68	44.23	1	15200	12000	7330	9120	12100	18400	9920	11400		1	0.79	0.48	0.6	0.8	1.22	0.65	0.75	154	165	iTRAQ 8plex (K N-term); Carboxymethyl; Citrullination	G1:iTRAQ 8plex (K N-term):1000.00;C6:Carboxymethyl:1000.00;K11:iTRAQ 8plex (K N-term):1000.00;R12:Citrullination:1000.00
Q02383|SEMG2_HUMAN	H.L(+304.20)GGSQQLLNYK(+304.20)QEGR(+.98).D	24.02	6.26	2299.26	10.8	767.437	107.04	2	49500	39300	20600	36900	30700	32000	22500	19800		1	0.79	0.42	0.74	0.62	0.65	0.46	0.4	100	114	iTRAQ 8plex (K N-term); Citrullination	L1:iTRAQ 8plex (K N-term):1000.00;K11:iTRAQ 8plex (K N-term):1000.00;R15:Citrullination:1000.00
Q02383|SEMG2_HUMAN	K.G(+304.20)HYQNVVDVR(+.98).E	21.64	6.35	1490.77	11.9	497.938	66.51	2	33300	28800	35200	32700	31100	63700	40800	24200		1	0.87	1.06	0.98	0.93	1.91	1.22	0.73	218	227	iTRAQ 8plex (K N-term); Citrullination	G1:iTRAQ 8plex (K N-term):1000.00;R10:Citrullination:1000.00
P04279|SEMG1_HUMAN	K.G(+304.20)SFSIQYTYHVDANDHDQSR(+.98).K	57.38	12.52	2644.2	12.3	662.067	106.09	3	131000	123000	186000	116000	155000	163000	194000	120000		1	0.94	1.42	0.88	1.18	1.24	1.48	0.91	61	80	iTRAQ 8plex (K N-term); Citrullination	G1:iTRAQ 8plex (K N-term):1000.00;R20:Citrullination:1000.00
P04279|SEMG1_HUMAN	K.G(+304.20)ESGQSTNR(+.98)EQDLLSHEQK(+304.20).G	56.52	12.68	2751.38	10.8	688.859	70.34	1	203000	136000	125000	124000	146000	247000	178000	88500		1	0.67	0.62	0.61	0.72	1.22	0.88	0.44	405	423	iTRAQ 8plex (K N-term); Citrullination	G1:iTRAQ 8plex (K N-term):1000.00;R9:Citrullination:1000.00;K19:iTRAQ 8plex (K N-term):1000.00
P04279|SEMG1_HUMAN	R.H(+304.20)LAQHLNNDR(+.98)NPLFT	54.15	12.14	2094.09	10.3	699.043	101.23	8	326000	254000	261000	234000	254000	382000	275000	168000		1	0.78	0.8	0.72	0.78	1.17	0.84	0.52	448	462	iTRAQ 8plex (K N-term); Citrullination	H1:iTRAQ 8plex (K N-term):1000.00;R10:Citrullination:1000.00
P04279|SEMG1_HUMAN	R.H(+304.20)LAQHLNNDR(+.98).N	38.82	10.38	1521.79	11.5	508.276	30.3	2	80000	83200	99300	63000	71800	109000	92400	32000		1	1.04	1.24	0.79	0.9	1.37	1.15	0.4	448	457	iTRAQ 8plex (K N-term); Citrullination	H1:iTRAQ 8plex (K N-term):1000.00;R10:Citrullination:1000.00
P04279|SEMG1_HUMAN	R.H(+304.20)LGGSQQLLHNK(+304.20)QEGR(+.98).D	37.62	9.37	2410.32	13.5	483.077	64.23	1	36500	24500	14500	22300	25900	33300	19600	13800		1	0.67	0.4	0.61	0.71	0.91	0.54	0.38	99	114	iTRAQ 8plex (K N-term); Citrullination	H1:iTRAQ 8plex (K N-term):1000.00;K12:iTRAQ 8plex (K N-term):1000.00;R16:Citrullination:1000.00
P04279|SEMG1_HUMAN	F.S(+304.20)IQYTYHVDANDHDQSR(+.98).K	37.39	8.97	2353.08	10.6	589.284	76.58	2	28800	30200	35100	26600	35200	34300	35400	29600		1	1.05	1.22	0.93	1.22	1.19	1.23	1.03	64	80	iTRAQ 8plex (K N-term); Citrullination	S1:iTRAQ 8plex (K N-term):1000.00;R17:Citrullination:1000.00
P04279|SEMG1_HUMAN	K.N(+304.20)LNQDQQHGR(+.98).K	33.78	8.55	1513.75	6.4	757.886	20.19	3	123000	71300	66700	93200	59900	113000	77800	27700		1	0.58	0.54	0.76	0.49	0.92	0.63	0.23	272	281	iTRAQ 8plex (K N-term); Citrullination	N1:iTRAQ 8plex (K N-term):1000.00;R10:Citrullination:1000.00
P04279|SEMG1_HUMAN	K.G(+304.20)R(+.98)LPSEFSQFPHGQK(+304.20).G	29.52	8.25	2323.24	11.5	581.825	107.42	2	111000	87100	87200	88000	117000	170000	134000	60500		1	0.79	0.79	0.79	1.06	1.54	1.21	0.55	30	44	iTRAQ 8plex (K N-term); Citrullination	G1:iTRAQ 8plex (K N-term):1000.00;R2:Citrullination:1000.00;K15:iTRAQ 8plex (K N-term):1000.00
P04279|SEMG1_HUMAN	K.G(+304.20)HYQNVVEVR(+.98).E	29.49	8.14	1504.79	9.5	502.608	57.63	3	106000	88900	120000	103000	92200	143000	139000	71100		1	0.84	1.13	0.97	0.87	1.35	1.31	0.67	218	227	iTRAQ 8plex (K N-term); Citrullination	G1:iTRAQ 8plex (K N-term):1000.00;R10:Citrullination:1000.00
P04279|SEMG1_HUMAN	K.Q(+304.20)EPWHGENAK(+304.20)GESGQSTNR(+.98).E	26.29	6.94	2720.33	10.8	681.096	51.98	1	17500	14700	11200	11200	15500	17400	16300	10100		1	0.84	0.64	0.64	0.89	0.99	0.93	0.58	395	413	iTRAQ 8plex (K N-term); Citrullination	Q1:iTRAQ 8plex (K N-term):1000.00;K10:iTRAQ 8plex (K N-term):1000.00;R19:Citrullination:1000.00
P04279|SEMG1_HUMAN	K.G(+304.20)ISSQYSNTEER(+.98).L	21.73	5.69	1674.8	9.2	559.277	61.52	1	10700	7520	8650	7010	6960	9280	8590	5620		1	0.7	0.81	0.65	0.65	0.87	0.8	0.52	154	165	iTRAQ 8plex (K N-term); Citrullination	G1:iTRAQ 8plex (K N-term):1000.00;R12:Citrullination:1000.00
P15144|AMPN_HUMAN	R.E(+304.20)NSLLFDPLSSSSSNK(+304.20)ER(+.98).V	57.03	12.46	2618.35	7.1	873.798	143.49	1	22300	21100	20700	19100	20000	21400	23800	29900		1	0.95	0.93	0.85	0.9	0.96	1.07	1.34	364	381	iTRAQ 8plex (K N-term); Citrullination	E1:iTRAQ 8plex (K N-term):1000.00;K16:iTRAQ 8plex (K N-term):1000.00;R18:Citrullination:1000.00
P15144|AMPN_HUMAN	R.D(+304.20)HSAIPVINR(+.98).A	52.7	11.89	1425.78	7.8	713.904	70	3	125000	63900	72900	59700	68900	66800	66300	87600		1	0.51	0.58	0.48	0.55	0.54	0.53	0.7	649	658	iTRAQ 8plex (K N-term); Citrullination	D1:iTRAQ 8plex (K N-term):1000.00;R10:Citrullination:1000.00
P15144|AMPN_HUMAN	R.V(+304.20)TLRPYLTPNDR(+.98).G	42.72	10.2	1748.97	9.2	584.002	116.05	2	65000	78100	73900	88600	62300	81500	90000	132000		1	1.2	1.14	1.36	0.96	1.25	1.38	2.03	87	98	iTRAQ 8plex (K N-term); Citrullination	V1:iTRAQ 8plex (K N-term):1000.00;R12:Citrullination:78.57
P15144|AMPN_HUMAN	R.K(+304.20)(+304.20)VVATTQMQAADAR(+.98).K	41.73	9.81	2098.16	10.5	700.4	83.17	3	59000	48800	54600	49300	55400	52300	53800	101000		1	0.83	0.93	0.84	0.94	0.89	0.91	1.71	205	218	iTRAQ 8plex (K N-term); Citrullination	K1:iTRAQ 8plex (K N-term):1000.00;K1:iTRAQ 8plex (K N-term):1000.00;R14:Citrullination:1000.00
P15144|AMPN_HUMAN	K.V(+304.20)VATTQMQAADAR(+.98).K	28.55	7.26	1665.86	7.8	833.944	97.39	1	28300	18800	27700	23400	23400	22500	24900	41600		1	0.66	0.98	0.82	0.83	0.8	0.88	1.47	206	218	iTRAQ 8plex (K N-term); Citrullination	V1:iTRAQ 8plex (K N-term):1000.00;R13:Citrullination:1000.00
P15144|AMPN_HUMAN	K.D(+304.20)LMVLNDVYR(+.98).V	27.56	7.62	1541.8	8.9	771.915	171.7	1	36900	26500	62800	33100	38400	37900	51000	67600		1	0.72	1.7	0.9	1.04	1.03	1.38	1.83	433	442	iTRAQ 8plex (K N-term); Citrullination	D1:iTRAQ 8plex (K N-term):1000.00;R10:Citrullination:1000.00
P15144|AMPN_HUMAN	K.E(+304.20)LWILNR(+.98).Y	26.19	6.93	1247.71	11.6	624.871	166.83	1	34200	28300	44300	27000	30700	30300	38100	50300		1	0.83	1.3	0.79	0.9	0.89	1.11	1.47	837	843	iTRAQ 8plex (K N-term); Citrullination	E1:iTRAQ 8plex (K N-term):1000.00;R7:Citrullination:1000.00
P15144|AMPN_HUMAN	K.Q(+304.20)WMENPNNNPIHPNLR(+.98).S	25.32	6.28	2278.12	7.8	760.385	123.37	1	7700	6730	8110	6920	7000	6210	6480	7900		1	0.87	1.05	0.9	0.91	0.81	0.84	1.03	778	793	iTRAQ 8plex (K N-term); Citrullination	Q1:iTRAQ 8plex (K N-term):1000.00;R16:Citrullination:1000.00
P15144|AMPN_HUMAN	R.K(+304.20)(+304.20)IQTQLQR(+.98).D	24.34	7.32	1622.98	11.3	542.007	67.15	1	53000	46100	50300	48200	51800	46100	47800	110000		1	0.87	0.95	0.91	0.98	0.87	0.9	2.08	641	648	iTRAQ 8plex (K N-term); Citrullination	K1:iTRAQ 8plex (K N-term):1000.00;K1:iTRAQ 8plex (K N-term):1000.00;R8:Citrullination:1000.00
P02751|FINC_HUMAN	K.G(+304.20)LK(+304.20)PGVVYEGQLISIQQYGHQEVTR(+.98).F	59.03	12.06	3407.86	9.1	852.979	154.48	1	2200	2370	1550	2020	2890	3400	3540	1290		1	1.08	0.71	0.92	1.31	1.55	1.61	0.59	670	694	iTRAQ 8plex (K N-term); Citrullination	G1:iTRAQ 8plex (K N-term):1000.00;K3:iTRAQ 8plex (K N-term):1000.00;R25:Citrullination:1000.00
P02751|FINC_HUMAN	R.V(+304.20)DVIPVNLPGEHGQR(+.98).L	51.88	11.82	1934.05	9.6	645.696	136.36	2	34000	36700	38400	32100	36500	34300	28400	25500		1	1.08	1.13	0.94	1.07	1.01	0.84	0.75	939	953	iTRAQ 8plex (K N-term); Citrullination	V1:iTRAQ 8plex (K N-term):1000.00;R15:Citrullination:1000.00
P02751|FINC_HUMAN	K.I(+304.20)YLYTLNDNAR(+.98).S	30.59	7.42	1659.87	10.5	830.952	156.49	2	38100	35000	36400	23700	35300	43200	37900	13800		1	0.92	0.96	0.62	0.93	1.13	1	0.36	1972	1982	iTRAQ 8plex (K N-term); Citrullination	I1:iTRAQ 8plex (K N-term):1000.00;R11:Citrullination:1000.00
P02751|FINC_HUMAN	K.L(+304.20)GVR(+.98)PSQGGEAPR.E	22.41	6.3	1627.89	12.8	543.644	56.12	1	30100	49500	33800	36800	32300	33900	35400	25000		1	1.64	1.12	1.22	1.07	1.12	1.17	0.83	1117	1129	iTRAQ 8plex (K N-term); Citrullination	L1:iTRAQ 8plex (K N-term):1000.00;R4:Citrullination:0.00
tr|E7EQB2|E7EQB2_HUMAN	K.L(+304.20)R(+.98)PVAAEVYGTER.Q	43.74	10.65	1764.96	1.2	589.329	93.63	1	36700	38000	56900	33700	34600	40200	44900	47300		1	1.03	1.55	0.92	0.94	1.09	1.22	1.29	80	92	iTRAQ 8plex (K N-term); Citrullination	L1:iTRAQ 8plex (K N-term):1000.00;R2:Citrullination:34.08
tr|E7EQB2|E7EQB2_HUMAN	R.I(+304.20)DSGLYLGSGYFTAIQNLR(+.98).K	34.63	7.42	2392.25	9.6	798.433	215.52	2	2090	1720	2770	1490	1060	1310	1590	791.547		1	0.82	1.32	0.71	0.51	0.63	0.76	0.38	320	338	iTRAQ 8plex (K N-term); Citrullination	I1:iTRAQ 8plex (K N-term):1000.00;R19:Citrullination:1000.00
tr|E7EQB2|E7EQB2_HUMAN	R.D(+304.20)SPIQC(+58.01)IQAIAENR(+.98).A	28.66	6.59	1919.95	8.3	960.991	183.02	3	9020	9060	19200	7350	7870	10400	13900	11800		1	1	2.12	0.81	0.87	1.15	1.54	1.3	46	59	iTRAQ 8plex (K N-term); Carboxymethyl; Citrullination	D1:iTRAQ 8plex (K N-term):1000.00;C6:Carboxymethyl:1000.00;R14:Citrullination:1000.00
tr|E7ER44|E7ER44_HUMAN	K.L(+304.20)R(+.98)PVAAEVYGTER.Q	43.74	10.65	1764.96	1.2	589.329	93.63	1	36700	38000	56900	33700	34600	40200	44900	47300		1	1.03	1.55	0.92	0.94	1.09	1.22	1.29	93	105	iTRAQ 8plex (K N-term); Citrullination	L1:iTRAQ 8plex (K N-term):1000.00;R2:Citrullination:34.08
tr|E7ER44|E7ER44_HUMAN	R.I(+304.20)DSGLYLGSGYFTAIQNLR(+.98).K	34.63	7.42	2392.25	9.6	798.433	215.52	2	2090	1720	2770	1490	1060	1310	1590	791.547		1	0.82	1.32	0.71	0.51	0.63	0.76	0.38	333	351	iTRAQ 8plex (K N-term); Citrullination	I1:iTRAQ 8plex (K N-term):1000.00;R19:Citrullination:1000.00
tr|E7ER44|E7ER44_HUMAN	R.D(+304.20)SPIQC(+58.01)IQAIAENR(+.98).A	28.66	6.59	1919.95	8.3	960.991	183.02	3	9020	9060	19200	7350	7870	10400	13900	11800		1	1	2.12	0.81	0.87	1.15	1.54	1.3	59	72	iTRAQ 8plex (K N-term); Carboxymethyl; Citrullination	D1:iTRAQ 8plex (K N-term):1000.00;C6:Carboxymethyl:1000.00;R14:Citrullination:1000.00
P02788|TRFL_HUMAN	K.L(+304.20)R(+.98)PVAAEVYGTER.Q	43.74	10.65	1764.96	1.2	589.329	93.63	1	36700	38000	56900	33700	34600	40200	44900	47300		1	1.03	1.55	0.92	0.94	1.09	1.22	1.29	93	105	iTRAQ 8plex (K N-term); Citrullination	L1:iTRAQ 8plex (K N-term):1000.00;R2:Citrullination:34.08
P02788|TRFL_HUMAN	R.I(+304.20)DSGLYLGSGYFTAIQNLR(+.98).K	34.63	7.42	2392.25	9.6	798.433	215.52	2	2090	1720	2770	1490	1060	1310	1590	791.547		1	0.82	1.32	0.71	0.51	0.63	0.76	0.38	333	351	iTRAQ 8plex (K N-term); Citrullination	I1:iTRAQ 8plex (K N-term):1000.00;R19:Citrullination:1000.00
P02788|TRFL_HUMAN	R.D(+304.20)SPIQC(+58.01)IQAIAENR(+.98).A	28.66	6.59	1919.95	8.3	960.991	183.02	3	9020	9060	19200	7350	7870	10400	13900	11800		1	1	2.12	0.81	0.87	1.15	1.54	1.3	59	72	iTRAQ 8plex (K N-term); Carboxymethyl; Citrullination	D1:iTRAQ 8plex (K N-term):1000.00;C6:Carboxymethyl:1000.00;R14:Citrullination:1000.00
P27487|DPP4_HUMAN	R.Y(+304.20)MGLPTPEDNLDHYR(+.98).N	43.26	9.56	2125	18.1	709.355	152.38	0	6530	6510	6480	7550	7320	7020	6620	6130		1	1	0.99	1.16	1.12	1.08	1.01	0.94	670	684	iTRAQ 8plex (K N-term); Citrullination	Y1:iTRAQ 8plex (K N-term):1000.00;R15:Citrullination:1000.00
P27487|DPP4_HUMAN	R.R(+304.20)LGTFEVEDQIEAAR(+.98).Q	42.55	9.67	2038.06	6.7	680.365	139.42	1	24000	22000	20600	18900	17400	16900	18100	18100		1	0.92	0.86	0.79	0.72	0.7	0.75	0.75	597	611	iTRAQ 8plex (K N-term); Citrullination	R1:iTRAQ 8plex (K N-term):1000.00;R15:Citrullination:1000.00
P27487|DPP4_HUMAN	R.L(+304.20)GTFEVEDQIEAAR(+.98).Q	39.01	9.02	1881.96	8.4	941.994	173.53	1	10800	11000	9860	12500	8400	8630	10600	5550		1	1.02	0.91	1.16	0.78	0.8	0.98	0.51	598	611	iTRAQ 8plex (K N-term); Citrullination	L1:iTRAQ 8plex (K N-term):1000.00;R14:Citrullination:1000.00
P07900|HS90A_HUMAN	R.R(+304.20)APFDLFENR(+.98).K	43.6	9.97	1568.82	12.2	523.954	137.99	1	9070	9880	12800	10000	12000	13900	11600	11700		1	1.09	1.41	1.11	1.33	1.53	1.28	1.29	346	355	iTRAQ 8plex (K N-term); Citrullination	R1:iTRAQ 8plex (K N-term):1000.00;R10:Citrullination:1000.00
P07900|HS90A_HUMAN	K.E(+304.20)LHINLIPNK(+304.20)QDR(+.98).T	38.2	9.02	2198.25	11.7	733.767	113.67	2	54700	53100	50600	52700	59200	58400	47700	53700		1	0.97	0.92	0.96	1.08	1.07	0.87	0.98	75	87	iTRAQ 8plex (K N-term); Citrullination	E1:iTRAQ 8plex (K N-term):1000.00;K10:iTRAQ 8plex (K N-term):1000.00;R13:Citrullination:1000.00
Q9Y3R5|DOP2_HUMAN	K.N(+304.20)VEFIHSLLQR(+.98).C	51.29	10.99	1659.92	12.7	554.321	162.9	1	7410	7150	5860	6230	5960	5160	5730	6280		1	0.97	0.79	0.84	0.8	0.7	0.77	0.85	1370	1380	iTRAQ 8plex (K N-term); Citrullination	N1:iTRAQ 8plex (K N-term):1000.00;R11:Citrullination:1000.00
Q9Y3R5|DOP2_HUMAN	R.A(+304.20)SLLDSNVLVQR(+.98).N	32.81	7.67	1618.91	9.1	810.472	156.31	1	15100	16200	19200	13000	15700	14700	16700	16300		1	1.07	1.27	0.86	1.04	0.97	1.11	1.08	233	244	iTRAQ 8plex (K N-term); Citrullination	A1:iTRAQ 8plex (K N-term):1000.00;R12:Citrullination:1000.00
P49327|FAS_HUMAN	R.R(+304.20)(+.98)PTPQDSPIFLPVDDTSFR.W	60.16	12.45	2492.28	6.7	831.773	165.16	2	9120	9520	13200	9500	10800	10500	13400	9400		1	1.04	1.44	1.04	1.18	1.15	1.47	1.03	1405	1423	iTRAQ 8plex (K N-term); Citrullination	R1:iTRAQ 8plex (K N-term):1000.00;R1:Citrullination:105.21
P49327|FAS_HUMAN	R.R(+304.20)PTPQDSPIFLPVDDTSFR(+.98).W	36.84	7.92	2492.28	15.6	831.78	158.54	1	1880	2270	2060	2410	1640	1540	1970	1650		1	1.2	1.1	1.28	0.87	0.82	1.05	0.88	1405	1423	iTRAQ 8plex (K N-term); Citrullination	R1:iTRAQ 8plex (K N-term):1000.00;R19:Citrullination:1000.00
P49327|FAS_HUMAN	K.V(+304.20)GDPQELNGITR(+.98).A	36.17	8.52	1602.85	8.3	802.437	94.66	1	14000	19100	15300	17100	22700	16100	14200	19000		1	1.36	1.09	1.22	1.62	1.15	1.01	1.35	299	310	iTRAQ 8plex (K N-term); Citrullination	V1:iTRAQ 8plex (K N-term):1000.00;R12:Citrullination:1000.00
tr|A0A0U1RQF0|A0A0U1RQF0_HUMAN	R.R(+304.20)(+.98)PTPQDSPIFLPVDDTSFR.W	60.16	12.45	2492.28	6.7	831.773	165.16	2	9120	9520	13200	9500	10800	10500	13400	9400		1	1.04	1.44	1.04	1.18	1.15	1.47	1.03	1403	1421	iTRAQ 8plex (K N-term); Citrullination	R1:iTRAQ 8plex (K N-term):1000.00;R1:Citrullination:105.21
tr|A0A0U1RQF0|A0A0U1RQF0_HUMAN	R.R(+304.20)PTPQDSPIFLPVDDTSFR(+.98).W	36.84	7.92	2492.28	15.6	831.78	158.54	1	1880	2270	2060	2410	1640	1540	1970	1650		1	1.2	1.1	1.28	0.87	0.82	1.05	0.88	1403	1421	iTRAQ 8plex (K N-term); Citrullination	R1:iTRAQ 8plex (K N-term):1000.00;R19:Citrullination:1000.00
tr|A0A0U1RQF0|A0A0U1RQF0_HUMAN	K.V(+304.20)GDPQELNGITR(+.98).A	36.17	8.52	1602.85	8.3	802.437	94.66	1	14000	19100	15300	17100	22700	16100	14200	19000		1	1.36	1.09	1.22	1.62	1.15	1.01	1.35	299	310	iTRAQ 8plex (K N-term); Citrullination	V1:iTRAQ 8plex (K N-term):1000.00;R12:Citrullination:1000.00
P08238|HS90B_HUMAN	K.I(+304.20)DIIPNPQER(+.98).T	29.61	7.56	1498.82	10	750.427	138.18	1	23300	30200	27900	29600	28900	23800	25000	27300		1	1.3	1.2	1.27	1.24	1.02	1.07	1.17	73	82	iTRAQ 8plex (K N-term); Citrullination	I1:iTRAQ 8plex (K N-term):1000.00;R10:Citrullination:1000.00
P11142|HSP7C_HUMAN	K.D(+304.20)AGTIAGLNVLR(+.98).I	40.19	9.46	1503.85	9	752.939	151.33	2	21300	22100	23400	19900	23200	24300	20900	25200		1	1.03	1.1	0.93	1.09	1.14	0.98	1.18	160	171	iTRAQ 8plex (K N-term); Citrullination	D1:iTRAQ 8plex (K N-term):1000.00;R12:Citrullination:1000.00
P11142|HSP7C_HUMAN	K.T(+304.20)VTNAVVTVPAYFNDSQR(+.98).Q	25.78	6.1	2286.17	7.8	763.071	166.1	2	9560	11000	9180	9440	8010	7910	8470	7410		1	1.15	0.96	0.99	0.84	0.83	0.89	0.78	138	155	iTRAQ 8plex (K N-term); Citrullination	T1:iTRAQ 8plex (K N-term):1000.00;R18:Citrullination:1000.00
Q8WUM4|PDC6I_HUMAN	R.L(+304.20)LDEEEATDNDLR(+.98).A	37.3	8.39	1836.88	9.3	919.458	134.11	1	5520	5810	5460	5270	5960	5260	5710	8370		1	1.05	0.99	0.96	1.08	0.95	1.04	1.52	457	469	iTRAQ 8plex (K N-term); Citrullination	L1:iTRAQ 8plex (K N-term):1000.00;R13:Citrullination:1000.00
Q8WUM4|PDC6I_HUMAN	K.E(+304.20)LPELLQR(+.98).N	31.52	8.58	1301.74	11	651.887	139.77	2	45400	47400	67100	43400	57900	49700	60200	83700		1	1.05	1.48	0.96	1.28	1.1	1.33	1.85	439	446	iTRAQ 8plex (K N-term); Citrullination	E1:iTRAQ 8plex (K N-term):1000.00;R8:Citrullination:1000.00
P0DMV9|HS71B_HUMAN	K.L(+304.20)LQDFFNGR(+.98).D	31.51	8.19	1413.75	11.8	707.891	202.31	2	65800	60200	56600	53900	55600	50600	50400	47900		1	0.91	0.86	0.82	0.85	0.77	0.77	0.73	349	357	iTRAQ 8plex (K N-term); Citrullination	L1:iTRAQ 8plex (K N-term):1000.00;R9:Citrullination:1000.00
P0DMV8|HS71A_HUMAN	K.L(+304.20)LQDFFNGR(+.98).D	31.51	8.19	1413.75	11.8	707.891	202.31	2	65800	60200	56600	53900	55600	50600	50400	47900		1	0.91	0.86	0.82	0.85	0.77	0.77	0.73	349	357	iTRAQ 8plex (K N-term); Citrullination	L1:iTRAQ 8plex (K N-term):1000.00;R9:Citrullination:1000.00
tr|A0A0G2JIW1|A0A0G2JIW1_HUMAN	K.L(+304.20)LQDFFNGR(+.98).D	31.51	8.19	1413.75	11.8	707.891	202.31	2	65800	60200	56600	53900	55600	50600	50400	47900		1	0.91	0.86	0.82	0.85	0.77	0.77	0.73	350	358	iTRAQ 8plex (K N-term); Citrullination	L1:iTRAQ 8plex (K N-term):1000.00;R9:Citrullination:1000.00
P63261|ACTG_HUMAN	R.T(+304.20)TGIVMDSGDGVTHTVPIYEGYALPHAILR(+.98).L	39.18	8.35	3487.79	13.8	872.967	182.18	0	3130	3330	3470	3730	3360	3390	3240	3200		1	1.06	1.11	1.19	1.07	1.08	1.03	1.02	148	177	iTRAQ 8plex (K N-term); Citrullination	T1:iTRAQ 8plex (K N-term):1000.00;R30:Citrullination:1000.00
P60709|ACTB_HUMAN	R.T(+304.20)TGIVMDSGDGVTHTVPIYEGYALPHAILR(+.98).L	39.18	8.35	3487.79	13.8	872.967	182.18	0	3130	3330	3470	3730	3360	3390	3240	3200		1	1.06	1.11	1.19	1.07	1.08	1.03	1.02	148	177	iTRAQ 8plex (K N-term); Citrullination	T1:iTRAQ 8plex (K N-term):1000.00;R30:Citrullination:1000.00
P08473|NEP_HUMAN	R.Q(+304.20)EER(+.98)LPIDENQLALEMNK(+304.20).V	51.52	11.2	2778.46	11	695.629	154.15	1	15900	12900	13900	12600	12800	14100	14600	17000		1	0.81	0.87	0.79	0.8	0.89	0.92	1.07	258	275	iTRAQ 8plex (K N-term); Citrullination	Q1:iTRAQ 8plex (K N-term):1000.00;R4:Citrullination:1000.00;K18:iTRAQ 8plex (K N-term):1000.00
P08473|NEP_HUMAN	K.N(+304.20)SVNHVIHIDQPR(+.98).L	51.06	11.3	1832.97	10.7	612.005	71.32	2	33000	34200	32000	32700	33900	31900	39900	39400		1	1.04	0.97	0.99	1.03	0.97	1.21	1.19	211	223	iTRAQ 8plex (K N-term); Citrullination	N1:iTRAQ 8plex (K N-term):1000.00;R13:Citrullination:1000.00
P08473|NEP_HUMAN	K.H(+304.20)VVEDLIAQIR(+.98).E	43.93	10	1596.91	11.4	533.316	121.98	1	21900	19000	23000	19000	20300	20400	21300	27400		1	0.87	1.05	0.87	0.93	0.93	0.97	1.25	438	448	iTRAQ 8plex (K N-term); Citrullination	H1:iTRAQ 8plex (K N-term):1000.00;R11:Citrullination:1000.00
P08473|NEP_HUMAN	K.V(+304.20)DK(+304.20)DEWISGAAVVNAFYSSGR(+.98).N	30.15	7.04	2879.48	15.8	960.849	198.36	1	12300	9510	11300	7730	11200	8170	11600	16000		1	0.77	0.92	0.63	0.91	0.66	0.94	1.3	530	550	iTRAQ 8plex (K N-term); Citrullination	V1:iTRAQ 8plex (K N-term):1000.00;K3:iTRAQ 8plex (K N-term):1000.00;R21:Citrullination:1000.00
P10909|CLUS_HUMAN	R.A(+304.20)SSIIDELFQDR(+.98).F	50.68	11.48	1697.87	9	849.951	160.76	5	57500	39600	61000	42700	38300	61800	86600	34700		1	0.69	1.06	0.74	0.67	1.07	1.51	0.6	183	194	iTRAQ 8plex (K N-term); Citrullination	A1:iTRAQ 8plex (K N-term):1000.00;R12:Citrullination:1000.00
P10909|CLUS_HUMAN	R.R(+304.20)ELDESLQVAER(+.98).L	41.38	9.77	1748.92	10.1	583.985	96.84	1	19200	17900	14200	16700	16400	18300	15700	13200		1	0.93	0.74	0.87	0.85	0.95	0.82	0.69	325	336	iTRAQ 8plex (K N-term); Citrullination	R1:iTRAQ 8plex (K N-term):1000.00;R12:Citrullination:1000.00
P10909|CLUS_HUMAN	R.Q(+304.20)QTHMLDVMQDHFSR(+.98).A	38.13	8.85	2177.02	10.5	545.269	114.36	0	11100	9170	7550	9690	8600	12000	10700	7430		1	0.83	0.68	0.87	0.77	1.08	0.96	0.67	168	182	iTRAQ 8plex (K N-term); Citrullination	Q1:iTRAQ 8plex (K N-term):1000.00;R15:Citrullination:1000.00
P10909|CLUS_HUMAN	R.E(+304.20)LDESLQVAER(+.98).L	37.64	11.26	1592.81	10.6	797.423	119.9	4	162000	132000	175000	148000	133000	206000	246000	147000		1	0.81	1.08	0.91	0.82	1.27	1.52	0.91	326	336	iTRAQ 8plex (K N-term); Citrullination	E1:iTRAQ 8plex (K N-term):1000.00;R11:Citrullination:1000.00
P10909|CLUS_HUMAN	R.I(+304.20)DSLLENDR(+.98).Q	36.29	9.12	1378.72	11.4	690.375	145.54	5	158000	130000	111000	158000	103000	135000	128000	84500		1	0.82	0.7	1	0.65	0.85	0.81	0.54	159	167	iTRAQ 8plex (K N-term); Citrullination	I1:iTRAQ 8plex (K N-term):1000.00;R9:Citrullination:1000.00
P10909|CLUS_HUMAN	L.R(+304.20)(+.98)R(+.98)ELDESLQVAER.L	22.58	6.11	1906	-1.1	636.34	97.2	1	9700	12600	11600	10100	11900	13800	9740	10300		1	1.29	1.2	1.04	1.23	1.43	1	1.06	324	336	iTRAQ 8plex (K N-term); Citrullination	R1:iTRAQ 8plex (K N-term):1000.00;R1:Citrullination:53.09;R2:Citrullination:44.44
P49221|TGM4_HUMAN	R.F(+304.20)VFSEVNGDR(+.98).L	39.25	10.66	1473.74	10.7	737.883	138.33	5	262000	315000	256000	275000	146000	146000	193000	141000		1	1.2	0.98	1.05	0.56	0.56	0.74	0.54	384	393	iTRAQ 8plex (K N-term); Citrullination	F1:iTRAQ 8plex (K N-term):1000.00;R10:Citrullination:1000.00
P15309|PPAP_HUMAN	K.G(+304.20)EYFVEMYYR(+.98).N	29.87	7.02	1660.77	8.7	831.399	174.21	0	6010	5550	8860	5070	5930	4720	7890	5560		1	0.92	1.48	0.84	0.99	0.79	1.31	0.93	323	332	iTRAQ 8plex (K N-term); Citrullination	G1:iTRAQ 8plex (K N-term):1000.00;R10:Citrullination:1000.00
P07355|ANXA2_HUMAN	R.R(+304.20)AEDGSVIDYELIDQDAR(+.98).D	52.21	11.12	2369.16	12.2	790.737	134.65	0	6480	6490	4950	5480	5280	5500	4950	6380		1	1	0.76	0.84	0.81	0.85	0.76	0.98	179	196	iTRAQ 8plex (K N-term); Citrullination	R1:iTRAQ 8plex (K N-term):1000.00;R18:Citrullination:1000.00
P07355|ANXA2_HUMAN	R.Q(+304.20)DIAFAYQR(+.98).R	34.34	8.39	1415.73	7.7	708.878	109.72	1	14300	14900	20100	14500	13200	14900	19400	14800		1	1.04	1.41	1.02	0.92	1.04	1.35	1.03	69	77	iTRAQ 8plex (K N-term); Citrullination	Q1:iTRAQ 8plex (K N-term):1000.00;R9:Citrullination:1000.00
P07355|ANXA2_HUMAN	R.T(+304.20)NQELQEINR(+.98).V	32.88	7.93	1548.8	9.6	775.415	79.07	2	23900	23500	15800	23000	25500	19000	17400	23200		1	0.98	0.66	0.96	1.07	0.8	0.73	0.97	136	145	iTRAQ 8plex (K N-term); Citrullination	T1:iTRAQ 8plex (K N-term):1000.00;R10:Citrullination:1000.00
P07355|ANXA2_HUMAN	R.A(+304.20)EDGSVIDYELIDQDAR(+.98).D	28.32	6.59	2213.06	17.9	738.707	159.43	1	4740	5620	4580	4730	4140	3910	3620	4230		1	1.19	0.97	1	0.87	0.83	0.76	0.89	180	196	iTRAQ 8plex (K N-term); Citrullination	A1:iTRAQ 8plex (K N-term):1000.00;R17:Citrullination:1000.00
P12277|KCRB_HUMAN	K.L(+304.20)LIEMEQR(+.98).L	31.55	8.54	1335.73	11.7	668.881	151.45	1	62500	79900	108000	81400	84000	71800	71500	87700		1	1.28	1.73	1.3	1.34	1.15	1.14	1.4	359	366	iTRAQ 8plex (K N-term); Citrullination	L1:iTRAQ 8plex (K N-term):1000.00;R8:Citrullination:1000.00
P13645|K1C10_HUMAN	R.S(+304.20)QYEQLAEQNR(+.98).K	34.03	7.76	1669.82	9.8	835.923	86	0	4930	5420	5220	16400	3760	4140	4490	5180		1	1.1	1.06	3.33	0.76	0.84	0.91	1.05	323	333	iTRAQ 8plex (K N-term); Citrullination	S1:iTRAQ 8plex (K N-term):1000.00;R11:Citrullination:1000.00
Q00796|DHSO_HUMAN	R.L(+304.20)ENYPIPEPGPNEVLLR(+.98).M	24.45	5.77	2254.21	9.5	752.418	191.75	1	3400	4090	3620	3850	3170	3440	3260	2570		1	1.2	1.06	1.13	0.93	1.01	0.96	0.75	22	38	iTRAQ 8plex (K N-term); Citrullination	L1:iTRAQ 8plex (K N-term):1000.00;R17:Citrullination:1000.00
Q96KP4|CNDP2_HUMAN	K.Y(+304.20)IDENQDR(+.98).Y	27.55	7.01	1356.64	8.6	679.334	57.43	1	9720	12300	16300	8240	16400	10900	13900	17300		1	1.26	1.68	0.85	1.68	1.12	1.43	1.78	10	17	iTRAQ 8plex (K N-term); Citrullination	Y1:iTRAQ 8plex (K N-term):1000.00;R8:Citrullination:1000.00
P19440|GGT1_HUMAN	K.G(+304.20)LAAALENK(+304.20)R(+.98).T	31.05	7.98	1650.98	13.6	551.341	106.17	1	61000	59500	47700	53300	46600	48900	46200	80100		1	0.98	0.78	0.87	0.76	0.8	0.76	1.31	173	182	iTRAQ 8plex (K N-term); Citrullination	G1:iTRAQ 8plex (K N-term):1000.00;K9:iTRAQ 8plex (K N-term):1000.00;R10:Citrullination:1000.00
P14618|KPYM_HUMAN	R.T(+304.20)ATESFASDPILYR(+.98)PVAVALDTK(+304.20).G	24.69	5.83	3073.67	15.2	769.436	175.73	1	4260	4270	3250	4480	3430	2820	3180	2770		1	1	0.76	1.05	0.81	0.66	0.75	0.65	93	115	iTRAQ 8plex (K N-term); Citrullination	T1:iTRAQ 8plex (K N-term):1000.00;R14:Citrullination:1000.00;K23:iTRAQ 8plex (K N-term):1000.00
P35908|K22E_HUMAN	K.N(+304.20)VQDAIADAEQR(+.98).G	32.44	7.32	1633.82	10.1	817.923	116.13	0	5030	4150	3130	7710	3070	3370	3210	3390		1	0.83	0.62	1.53	0.61	0.67	0.64	0.67	419	430	iTRAQ 8plex (K N-term); Citrullination	N1:iTRAQ 8plex (K N-term):1000.00;R12:Citrullination:1000.00
P12429|ANXA3_HUMAN	K.G(+304.20)IGTDEFTLNR(+.98).I	38.61	9.17	1526.78	8.6	764.405	124.29	1	14100	13800	18600	13500	18800	14500	16200	22600		1	0.98	1.32	0.96	1.34	1.03	1.15	1.6	264	274	iTRAQ 8plex (K N-term); Citrullination	G1:iTRAQ 8plex (K N-term):1000.00;R11:Citrullination:1000.00
P02768|ALBU_HUMAN	K.D(+304.20)DNPNLPR(+.98).L	23.99	6.67	1244.62	9.7	623.326	50.11	1	19100	20500	16600	53800	11600	18200	15800	10600		1	1.07	0.87	2.81	0.61	0.95	0.82	0.55	131	138	iTRAQ 8plex (K N-term); Citrullination	D1:iTRAQ 8plex (K N-term):1000.00;R8:Citrullination:1000.00
P22314|UBA1_HUMAN	R.N(+304.20)EEDAAELVALAQAVNAR(+.98).A	36.02	7.95	2188.12	10.8	730.389	205.6	1	2750	2010	6990	7200	1940	2410	6430	2700		1	0.73	2.54	2.61	0.7	0.87	2.33	0.98	351	368	iTRAQ 8plex (K N-term); Citrullination	N1:iTRAQ 8plex (K N-term):1000.00;R18:Citrullination:1000.00
P12273|PIP_HUMAN	K.S(+304.20)VR(+.98)PNDEVTAVLAVQTELK(+304.20).E	51.33	10.74	2677.5	10.5	893.517	170.1	7	75700	55400	55500	60400	51200	77100	60800	43400		1	0.73	0.73	0.8	0.68	1.02	0.8	0.57	45	63	iTRAQ 8plex (K N-term); Citrullination	S1:iTRAQ 8plex (K N-term):1000.00;R3:Citrullination:1000.00;K19:iTRAQ 8plex (K N-term):1000.00
P12273|PIP_HUMAN	K.T(+304.20)FYWDFYTNR(+.98).T	42.9	9.49	1716.8	8.1	859.416	186.21	1	17000	13500	13900	12000	9820	17900	11400	7510		1	0.79	0.82	0.71	0.58	1.06	0.67	0.44	97	106	iTRAQ 8plex (K N-term); Citrullination	T1:iTRAQ 8plex (K N-term):1000.00;R10:Citrullination:1000.00
P12273|PIP_HUMAN	R.E(+304.20)LGIC(+58.01)PDDAAVIPIK(+304.20)NNR(+.98).F	28.87	6.94	2604.39	12.3	869.149	149.41	1	21900	16300	5740	15600	14500	30800	10200	10400		1	0.74	0.26	0.71	0.66	1.41	0.47	0.47	119	136	iTRAQ 8plex (K N-term); Carboxymethyl; Citrullination	E1:iTRAQ 8plex (K N-term):1000.00;C5:Carboxymethyl:1000.00;K15:iTRAQ 8plex (K N-term):1000.00;R18:Citrullination:1000.00
P12273|PIP_HUMAN	K.S(+304.20)VR(+.98)PNDEVTAVL.A	26.73	6.38	1603.87	6.8	802.946	123.91	2	11500	8780	6410	18500	5310	11100	5960	6440		1	0.76	0.56	1.61	0.46	0.97	0.52	0.56	45	56	iTRAQ 8plex (K N-term); Citrullination	S1:iTRAQ 8plex (K N-term):1000.00;R3:Citrullination:1000.00
P35527|K1C9_HUMAN	R.Q(+304.20)GVDADINGLR(+.98).Q	39.08	9.21	1461.77	8.6	731.897	99.88	2	21300	29600	20200	99000	19300	19600	19200	23100		1	1.39	0.95	4.65	0.9	0.92	0.9	1.09	251	261	iTRAQ 8plex (K N-term); Citrullination	Q1:iTRAQ 8plex (K N-term):1000.00;R11:Citrullination:1000.00
P62258|1433E_HUMAN	K.A(+304.20)ASDIAMTELPPTHPIR(+.98).L	31.3	7.45	2124.11	17.5	709.058	128.43	0	8070	9250	6610	8620	8160	7580	6470	7170		1	1.15	0.82	1.07	1.01	0.94	0.8	0.89	154	170	iTRAQ 8plex (K N-term); Citrullination	A1:iTRAQ 8plex (K N-term):1000.00;R17:Citrullination:1000.00
P62258|1433E_HUMAN	R.Y(+304.20)LAEFATGNDR(+.98).K	21.37	5.72	1560.77	10.7	781.399	151.79	1	8680	8350	9210	9390	9140	9020	9250	9150		1	0.96	1.06	1.08	1.05	1.04	1.07	1.05	131	141	iTRAQ 8plex (K N-term); Citrullination	Y1:iTRAQ 8plex (K N-term):1000.00;R11:Citrullination:1000.00
P08758|ANXA5_HUMAN	R.S(+304.20)EIDLFNIR(+.98).K	22.5	5.9	1410.76	5.6	706.392	170.48	1	9610	7930	8850	10000	8520	8320	7860	8140		1	0.83	0.92	1.04	0.89	0.87	0.82	0.85	277	285	iTRAQ 8plex (K N-term); Citrullination	S1:iTRAQ 8plex (K N-term):1000.00;R9:Citrullination:1000.00
P04075|ALDOA_HUMAN	K.I(+304.20)GEHTPSALAIMENANVLAR(+.98).Y	31	6.83	2411.27	10.6	804.774	184.57	1	1880	2040	1870	1730	1710	1370	1270	1850		1	1.09	1	0.92	0.91	0.73	0.67	0.99	154	173	iTRAQ 8plex (K N-term); Citrullination	I1:iTRAQ 8plex (K N-term):1000.00;R20:Citrullination:1000.00
P04075|ALDOA_HUMAN	K.A(+304.20)DDGR(+.98)PFPQVIK(+304.20).S	28.73	7.68	1951.09	10.3	651.377	102.69	2	44900	47700	45800	45700	56900	50400	50100	60800		1	1.06	1.02	1.02	1.27	1.12	1.11	1.35	88	99	iTRAQ 8plex (K N-term); Citrullination	A1:iTRAQ 8plex (K N-term):1000.00;R5:Citrullination:1000.00;K12:iTRAQ 8plex (K N-term):1000.00
P04075|ALDOA_HUMAN	R.L(+304.20)QSIGTENTEENR(+.98)R.F	23.77	6.14	1950.99	7.5	651.341	70.81	1	9540	9570	8480	9240	8380	6760	6820	9860		1	1	0.89	0.97	0.88	0.71	0.71	1.03	44	57	iTRAQ 8plex (K N-term); Citrullination	L1:iTRAQ 8plex (K N-term):1000.00;R13:Citrullination:9.34
tr|J3KPS3|J3KPS3_HUMAN	K.I(+304.20)GEHTPSALAIMENANVLAR(+.98).Y	31	6.83	2411.27	10.6	804.774	184.57	1	1880	2040	1870	1730	1710	1370	1270	1850		1	1.09	1	0.92	0.91	0.73	0.67	0.99	154	173	iTRAQ 8plex (K N-term); Citrullination	I1:iTRAQ 8plex (K N-term):1000.00;R20:Citrullination:1000.00
tr|J3KPS3|J3KPS3_HUMAN	K.A(+304.20)DDGR(+.98)PFPQVIK(+304.20).S	28.73	7.68	1951.09	10.3	651.377	102.69	2	44900	47700	45800	45700	56900	50400	50100	60800		1	1.06	1.02	1.02	1.27	1.12	1.11	1.35	88	99	iTRAQ 8plex (K N-term); Citrullination	A1:iTRAQ 8plex (K N-term):1000.00;R5:Citrullination:1000.00;K12:iTRAQ 8plex (K N-term):1000.00
tr|J3KPS3|J3KPS3_HUMAN	R.L(+304.20)QSIGTENTEENR(+.98)R.F	23.77	6.14	1950.99	7.5	651.341	70.81	1	9540	9570	8480	9240	8380	6760	6820	9860		1	1	0.89	0.97	0.88	0.71	0.71	1.03	44	57	iTRAQ 8plex (K N-term); Citrullination	L1:iTRAQ 8plex (K N-term):1000.00;R13:Citrullination:9.34
P07288|KLK3_HUMAN	K.H(+304.20)SQPWQVLVASR(+.98).G	29.47	7.54	1711.93	12.4	571.656	121.95	3	108000	99200	87200	127000	68300	76100	78900	73000		1	0.92	0.81	1.18	0.64	0.71	0.73	0.68	34	45	iTRAQ 8plex (K N-term); Citrullination	H1:iTRAQ 8plex (K N-term):1000.00;R12:Citrullination:1000.00
P50995|ANX11_HUMAN	R.A(+304.20)HLVAVFNEYQR(+.98).M	38.02	8.44	1750.93	7.6	584.654	140.71	1	11200	11100	7540	9320	9150	8620	7550	10000		1	0.99	0.68	0.83	0.82	0.77	0.68	0.9	389	400	iTRAQ 8plex (K N-term); Citrullination	A1:iTRAQ 8plex (K N-term):1000.00;R12:Citrullination:1000.00
P50995|ANX11_HUMAN	R.G(+304.20)TITDAPGFDPLR(+.98)DAEVLR.K	25.79	6.23	2347.23	12.1	783.426	163.64	0	6220	5340	5420	6860	5880	5250	4490	5250		1	0.86	0.87	1.1	0.95	0.84	0.72	0.84	192	210	iTRAQ 8plex (K N-term); Citrullination	G1:iTRAQ 8plex (K N-term):1000.00;R13:Citrullination:22.09
Q9BZQ8|NIBA1_HUMAN	R.F(+304.20)PHIDLVVQR(+.98).T	49.08	11.01	1527.87	11.6	510.302	142.77	1	11100	9710	13100	10500	12000	13000	14000	10900		1	0.87	1.18	0.94	1.08	1.17	1.26	0.98	429	438	iTRAQ 8plex (K N-term); Citrullination	F1:iTRAQ 8plex (K N-term):1000.00;R10:Citrullination:1000.00
Q8IYJ3|SYTL1_HUMAN	R.Y(+304.20)SVPQAELQGR(+.98).V	39.9	9.53	1551.81	9	776.922	100.18	2	33800	37700	41100	33000	42100	31300	36500	46600		1	1.11	1.22	0.98	1.25	0.92	1.08	1.38	336	346	iTRAQ 8plex (K N-term); Citrullination	Y1:iTRAQ 8plex (K N-term):1000.00;R11:Citrullination:1000.00
Q8IYJ3|SYTL1_HUMAN	R.L(+304.20)TIDEAPQER(+.98).L	32.42	7.93	1475.77	6.3	738.898	91.43	1	20900	20900	22300	20600	23800	20000	19500	26400		1	1	1.07	0.99	1.14	0.96	0.93	1.26	139	148	iTRAQ 8plex (K N-term); Citrullination	L1:iTRAQ 8plex (K N-term):1000.00;R10:Citrullination:1000.00
P51159|RB27A_HUMAN	R.I(+304.20)HLQLWDTAGQER(+.98).F	45.56	10.3	1870.98	10.1	624.673	138.18	2	20700	23400	19300	19600	18900	16600	15400	14800		1	1.13	0.93	0.95	0.91	0.8	0.75	0.71	68	80	iTRAQ 8plex (K N-term); Citrullination	I1:iTRAQ 8plex (K N-term):1000.00;R13:Citrullination:1000.00
P51159|RB27A_HUMAN	K.S(+304.20)DLEDQR(+.98).V	26.41	7.32	1166.57	10	584.297	42.53	1	97000	52400	62100	33800	72700	43700	36200	87600		1	0.54	0.64	0.35	0.75	0.45	0.37	0.9	135	141	iTRAQ 8plex (K N-term); Citrullination	S1:iTRAQ 8plex (K N-term):1000.00;R7:Citrullination:1000.00
P09543|CN37_HUMAN	R.I(+304.20)LVLDDTNHER(+.98).E	36.32	8.94	1628.86	14.7	543.969	113.13	1	35200	33800	37000	34300	38500	37500	37600	37000		1	0.96	1.05	0.98	1.09	1.07	1.07	1.05	118	128	iTRAQ 8plex (K N-term); Citrullination	I1:iTRAQ 8plex (K N-term):1000.00;R11:Citrullination:1000.00
P50395|GDIB_HUMAN	K.D(+304.20)LGTESQIFISR(+.98).T	23	6.1	1669.88	2.9	835.948	146.61	0	9370	8620	14800	8470	10600	12400	13600	9330		1	0.92	1.58	0.9	1.13	1.32	1.46	1	391	402	iTRAQ 8plex (K N-term); Citrullination	D1:iTRAQ 8plex (K N-term):1000.00;R12:Citrullination:1000.00
P04406|G3P_HUMAN	K.L(+304.20)VINGNPITIFQER(+.98).D	22.42	6.31	1918.08	8.5	960.054	197.85	1	18500	18000	18100	18700	24300	16900	22800	17700		1	0.98	0.98	1.01	1.31	0.92	1.24	0.96	67	80	iTRAQ 8plex (K N-term); Citrullination	L1:iTRAQ 8plex (K N-term):1000.00;R14:Citrullination:1000.00
tr|Q6P452|Q6P452_HUMAN	K.G(+304.20)LGTDDNTLIR(+.98).V	21.51	5.94	1478.78	11.7	740.407	103.59	1	10900	12000	12800	12100	13000	11100	13000	16400		1	1.1	1.17	1.1	1.19	1.01	1.19	1.5	240	250	iTRAQ 8plex (K N-term); Citrullination	G1:iTRAQ 8plex (K N-term):1000.00;R11:Citrullination:1000.00
P09525|ANXA4_HUMAN	K.G(+304.20)LGTDDNTLIR(+.98).V	21.51	5.94	1478.78	11.7	740.407	103.59	1	10900	12000	12800	12100	13000	11100	13000	16400		1	1.1	1.17	1.1	1.19	1.01	1.19	1.5	260	270	iTRAQ 8plex (K N-term); Citrullination	G1:iTRAQ 8plex (K N-term):1000.00;R11:Citrullination:1000.00
Q14894|CRYM_HUMAN	K.F(+304.20)ADTVQGEVR(+.98).V	32.39	7.89	1425.74	12.3	713.884	114.79	1	20500	23800	19900	25100	21600	17600	17000	19100		1	1.16	0.97	1.22	1.05	0.86	0.83	0.93	177	186	iTRAQ 8plex (K N-term); Citrullination	F1:iTRAQ 8plex (K N-term):1000.00;R10:Citrullination:1000.00
O00560|SDCB1_HUMAN	R.A(+304.20)NVAVVSGAPLQGQLVAR(+.98).P	23.48	6.16	2054.17	9.3	685.738	145.38	1	13600	9500	7490	8530	10700	9440	7870	8760		1	0.7	0.55	0.63	0.78	0.69	0.58	0.64	68	85	iTRAQ 8plex (K N-term); Citrullination	A1:iTRAQ 8plex (K N-term):1000.00;R18:Citrullination:1000.00
P60174|TPIS_HUMAN	K.S(+304.20)NVSDAVAQSTR(+.98).I	36.55	8.34	1538.78	4.3	770.4	68.69	1	15500	17900	13100	13000	19100	14000	12400	16400		1	1.15	0.84	0.84	1.23	0.9	0.8	1.06	232	243	iTRAQ 8plex (K N-term); Citrullination	S1:iTRAQ 8plex (K N-term):1000.00;R12:Citrullination:1000.00
O00194|RB27B_HUMAN	K.V(+304.20)HLQLWDTAGQER(+.98).F	46.05	10.68	1856.96	9.2	620.001	129.23	1	20700	20200	22300	25200	18800	18700	17700	16300		1	0.97	1.08	1.22	0.91	0.91	0.86	0.79	68	80	iTRAQ 8plex (K N-term); Citrullination	V1:iTRAQ 8plex (K N-term):1000.00;R13:Citrullination:1000.00
O00194|RB27B_HUMAN	K.A(+304.20)DLPDQR(+.98).E	23.37	7.63	1118.58	10.1	560.304	51.12	1	49600	84000	164000	61700	73200	69100	127000	75400		1	1.69	3.31	1.24	1.48	1.39	2.57	1.52	135	141	iTRAQ 8plex (K N-term); Citrullination	A1:iTRAQ 8plex (K N-term):1000.00;R7:Citrullination:1000.00
Q99816|TS101_HUMAN	K.D(+304.20)LK(+304.20)PVLDSYVFNDGSSR(+.98).E	37	8.33	2520.32	11.3	841.124	171.79	1	5490	5070	6000	4640	5740	5840	6240	8160		1	0.92	1.09	0.85	1.05	1.06	1.14	1.49	34	50	iTRAQ 8plex (K N-term); Citrullination	D1:iTRAQ 8plex (K N-term):1000.00;K3:iTRAQ 8plex (K N-term):1000.00;R17:Citrullination:1000.00
P05154|IPSP_HUMAN	R.G(+304.20)FQQLLQELNQPR(+.98).D	43.05	9.09	1875.01	14.3	626.02	200.43	2	5110	4400	3550	4500	3510	3830	3940	3270		1	0.86	0.7	0.88	0.69	0.75	0.77	0.64	110	122	iTRAQ 8plex (K N-term); Citrullination	G1:iTRAQ 8plex (K N-term):1000.00;R13:Citrullination:1000.00
P05154|IPSP_HUMAN	K.T(+304.20)LYLADTFPTNFR(+.98).D	31.87	7.19	1862.97	7.8	932.498	193.71	1	4750	3320	3100	3980	3920	6310	3150	2640		1	0.7	0.65	0.84	0.83	1.33	0.66	0.56	151	163	iTRAQ 8plex (K N-term); Citrullination	T1:iTRAQ 8plex (K N-term):1000.00;R13:Citrullination:1000.00
P27348|1433T_HUMAN	K.A(+304.20)VTEQGAELSNEER(+.98).N	25.48	6.24	1836.9	8	919.462	79.36	1	5760	5500	7070	5900	6560	7300	8190	5920		1	0.96	1.23	1.02	1.14	1.27	1.42	1.03	28	41	iTRAQ 8plex (K N-term); Citrullination	A1:iTRAQ 8plex (K N-term):1000.00;R14:Citrullination:1000.00
P61019|RAB2A_HUMAN	K.L(+304.20)QIWDTAGQESFR(+.98).S	24.24	5.66	1854.94	10.1	928.485	180.08	1	2660	2290	2980	2420	2970	2380	2700	2170		1	0.86	1.12	0.91	1.12	0.9	1.01	0.82	57	69	iTRAQ 8plex (K N-term); Citrullination	L1:iTRAQ 8plex (K N-term):1000.00;R13:Citrullination:1000.00
O43854|EDIL3_HUMAN	K.S(+304.20)GHIQDYQITASSIFR(+.98).T	36.78	8.61	2127.09	17.1	710.048	140.71	1	15600	15000	18700	14100	19100	23700	21200	14100		1	0.96	1.2	0.9	1.22	1.52	1.36	0.9	327	342	iTRAQ 8plex (K N-term); Citrullination	S1:iTRAQ 8plex (K N-term):1000.00;R16:Citrullination:1000.00
tr|J3KS22|J3KS22_HUMAN	R.A(+304.20)VIQVSQIVAR(+.98).G	26.92	6.98	1487.89	9.8	744.961	148.28	2	21600	24500	28600	23100	27600	22000	23700	24100		1	1.14	1.33	1.07	1.28	1.02	1.1	1.12	108	118	iTRAQ 8plex (K N-term); Citrullination	A1:iTRAQ 8plex (K N-term):1000.00;R11:Citrullination:1000.00
Q7Z4W1|DCXR_HUMAN	R.A(+304.20)VIQVSQIVAR(+.98).G	26.92	6.98	1487.89	9.8	744.961	148.28	2	21600	24500	28600	23100	27600	22000	23700	24100		1	1.14	1.33	1.07	1.28	1.02	1.1	1.12	110	120	iTRAQ 8plex (K N-term); Citrullination	A1:iTRAQ 8plex (K N-term):1000.00;R11:Citrullination:1000.00
P47895|AL1A3_HUMAN	K.A(+304.20)VEAAQVAFQR(+.98).G	37.18	8.72	1493.81	10.4	747.92	133.72	1	8140	9480	10700	9010	11800	9830	10300	10900		1	1.16	1.31	1.11	1.45	1.21	1.26	1.34	74	84	iTRAQ 8plex (K N-term); Citrullination	A1:iTRAQ 8plex (K N-term):1000.00;R11:Citrullination:1000.00
tr|H0Y2X5|H0Y2X5_HUMAN	K.A(+304.20)VEAAQVAFQR(+.98).G	37.18	8.72	1493.81	10.4	747.92	133.72	1	8140	9480	10700	9010	11800	9830	10300	10900		1	1.16	1.31	1.11	1.45	1.21	1.26	1.34	74	84	iTRAQ 8plex (K N-term); Citrullination	A1:iTRAQ 8plex (K N-term):1000.00;R11:Citrullination:1000.00
P09467|F16P1_HUMAN	K.E(+304.20)AVLDVIPTDIHQR(+.98).A	45.22	9.96	1910.04	5.8	637.69	150.68	1	7580	6260	7500	6930	5820	8550	6820	8150		1	0.83	0.99	0.91	0.77	1.13	0.9	1.08	301	314	iTRAQ 8plex (K N-term); Citrullination	E1:iTRAQ 8plex (K N-term):1000.00;R14:Citrullination:1000.00
P09467|F16P1_HUMAN	R.D(+304.20)FDPAVTEYIQR(+.98).K	32.59	7.78	1757.87	6	879.949	156.81	1	7580	8150	10100	7640	10100	8330	9590	9860		1	1.08	1.33	1.01	1.33	1.1	1.27	1.3	219	230	iTRAQ 8plex (K N-term); Citrullination	D1:iTRAQ 8plex (K N-term):1000.00;R12:Citrullination:1000.00
P26038|MOES_HUMAN	R.A(+304.20)LELEQER(+.98).K	22.9	6.89	1291.69	10.5	646.858	89.42	1	38000	39100	47600	41000	45200	44300	41700	64600		1	1.03	1.25	1.08	1.19	1.17	1.1	1.7	372	379	iTRAQ 8plex (K N-term); Citrullination	A1:iTRAQ 8plex (K N-term):1000.00;R8:Citrullination:1000.00
tr|I3L1D5|I3L1D5_HUMAN	R.E(+304.20)LLIVPGQVVDR(+.98).S	21.53	5.99	1641.96	15.4	821.998	165.91	1	12100	14700	15200	14200	15500	12700	14600	17700		1	1.22	1.26	1.18	1.28	1.06	1.21	1.47	418	429	iTRAQ 8plex (K N-term); Citrullination	E1:iTRAQ 8plex (K N-term):1000.00;R12:Citrullination:1000.00
O15296|LX15B_HUMAN	R.E(+304.20)LLIVPGQVVDR(+.98).S	21.53	5.99	1641.96	15.4	821.998	165.91	1	12100	14700	15200	14200	15500	12700	14600	17700		1	1.22	1.26	1.18	1.28	1.06	1.21	1.47	418	429	iTRAQ 8plex (K N-term); Citrullination	E1:iTRAQ 8plex (K N-term):1000.00;R12:Citrullination:1000.00
P28907|CD38_HUMAN	R.I(+304.20)K(+304.20)DLAHQFTQVQR(+.98).D	38.45	9.02	2192.24	11.4	549.074	134.09	1	11800	11500	8760	10500	10200	11600	9980	11000		1	0.97	0.74	0.89	0.86	0.98	0.84	0.93	128	140	iTRAQ 8plex (K N-term); Citrullination	I1:iTRAQ 8plex (K N-term):1000.00;K2:iTRAQ 8plex (K N-term):1000.00;R13:Citrullination:1000.00
P51149|RAB7A_HUMAN	K.E(+304.20)AINVEQAFQTIAR(+.98).N	22.85	5.44	1894	11.9	632.35	194.12	1	3220	2870	2900	3190	3010	2880	2730	3140		1	0.89	0.9	0.99	0.93	0.89	0.85	0.97	158	171	iTRAQ 8plex (K N-term); Citrullination	E1:iTRAQ 8plex (K N-term):1000.00;R14:Citrullination:1000.00
O60701|UGDH_HUMAN	R.V(+304.20)LIGGDETPEGQR(+.98).A	33.89	7.7	1674.87	8.9	838.449	98.07	1	4930	5380	4920	5080	6910	5170	5190	5520		1	1.09	1	1.03	1.4	1.05	1.05	1.12	178	190	iTRAQ 8plex (K N-term); Citrullination	V1:iTRAQ 8plex (K N-term):1000.00;R13:Citrullination:1000.00
P20073|ANXA7_HUMAN	K.G(+304.20)FGTDEQAIVDVVANR(+.98).S	23.27	5.52	1995.02	10.8	666.02	187.63	1	2920	2920	3760	2970	2510	2990	3210	3020		1	1	1.29	1.02	0.86	1.02	1.1	1.04	200	215	iTRAQ 8plex (K N-term); Citrullination	G1:iTRAQ 8plex (K N-term):1000.00;R16:Citrullination:1000.00
P40925|MDHC_HUMAN	K.G(+304.20)EFVTTVQQR(+.98).G	35.82	8.71	1468.78	10	735.403	90.08	1	28100	29400	32100	29300	35300	31300	32900	32800		1	1.05	1.14	1.04	1.26	1.12	1.17	1.17	221	230	iTRAQ 8plex (K N-term); Citrullination	G1:iTRAQ 8plex (K N-term):1000.00;R10:Citrullination:1000.00
P40925|MDHC_HUMAN	K.F(+304.20)VEGLPINDFSR(+.98).E	26.31	6.15	1697.89	10.1	849.96	190.68	1	4040	4390	4250	3670	4680	3100	2960	3080		1	1.09	1.05	0.91	1.16	0.77	0.73	0.76	299	310	iTRAQ 8plex (K N-term); Citrullination	F1:iTRAQ 8plex (K N-term):1000.00;R12:Citrullination:1000.00
tr|A0A0G2JN42|A0A0G2JN42_HUMAN	K.D(+304.20)AFPTFSVQLR(+.98).R	29.96	7.17	1584.84	6.5	793.433	169.11	1	7750	7560	12700	6820	5300	6210	17800	5160		1	0.98	1.64	0.88	0.68	0.8	2.29	0.67	77	87	iTRAQ 8plex (K N-term); Citrullination	D1:iTRAQ 8plex (K N-term):1000.00;R11:Citrullination:1000.00
tr|A0A0G2JN42|A0A0G2JN42_HUMAN	T.S(+304.20)YTSPGLQR(+.98).L	23.03	6.25	1312.69	8.7	657.357	61.49	1	13500	12100	12600	10100	11700	12000	17500	11300		1	0.9	0.93	0.75	0.87	0.89	1.3	0.84	23	31	iTRAQ 8plex (K N-term); Citrullination	S1:iTRAQ 8plex (K N-term):1000.00;R9:Citrullination:1000.00
tr|A0A0G2JNJ8|A0A0G2JNJ8_HUMAN	K.D(+304.20)AFPTFSVQLR(+.98).R	29.96	7.17	1584.84	6.5	793.433	169.11	1	7750	7560	12700	6820	5300	6210	17800	5160		1	0.98	1.64	0.88	0.68	0.8	2.29	0.67	77	87	iTRAQ 8plex (K N-term); Citrullination	D1:iTRAQ 8plex (K N-term):1000.00;R11:Citrullination:1000.00
tr|A0A0G2JNJ8|A0A0G2JNJ8_HUMAN	T.S(+304.20)YTSPGLQR(+.98).L	23.03	6.25	1312.69	8.7	657.357	61.49	1	13500	12100	12600	10100	11700	12000	17500	11300		1	0.9	0.93	0.75	0.87	0.89	1.3	0.84	23	31	iTRAQ 8plex (K N-term); Citrullination	S1:iTRAQ 8plex (K N-term):1000.00;R9:Citrullination:1000.00
Q6W4X9|MUC6_HUMAN	K.D(+304.20)AFPTFSVQLR(+.98).R	29.96	7.17	1584.84	6.5	793.433	169.11	1	7750	7560	12700	6820	5300	6210	17800	5160		1	0.98	1.64	0.88	0.68	0.8	2.29	0.67	77	87	iTRAQ 8plex (K N-term); Citrullination	D1:iTRAQ 8plex (K N-term):1000.00;R11:Citrullination:1000.00
Q6W4X9|MUC6_HUMAN	T.S(+304.20)YTSPGLQR(+.98).L	23.03	6.25	1312.69	8.7	657.357	61.49	1	13500	12100	12600	10100	11700	12000	17500	11300		1	0.9	0.93	0.75	0.87	0.89	1.3	0.84	23	31	iTRAQ 8plex (K N-term); Citrullination	S1:iTRAQ 8plex (K N-term):1000.00;R9:Citrullination:1000.00
Q6UX06|OLFM4_HUMAN	K.G(+304.20)LYWVAPLNTDGR(+.98).L	27.28	6.23	1765.93	8.7	883.977	175.57	1	2670	1990	6670	1730	1850	1800	4420	2070		1	0.74	2.49	0.65	0.69	0.67	1.65	0.77	286	298	iTRAQ 8plex (K N-term); Citrullination	G1:iTRAQ 8plex (K N-term):1000.00;R13:Citrullination:1000.00
tr|A0A087WXI2|A0A087WXI2_HUMAN	K.L(+304.20)PVVLANGQIR(+.98).A	26.84	7.36	1483.9	8.5	742.962	148.78	1	30600	29500	33000	28900	21200	22800	52800	37800		1	0.97	1.08	0.94	0.69	0.75	1.73	1.24	1338	1348	iTRAQ 8plex (K N-term); Citrullination	L1:iTRAQ 8plex (K N-term):1000.00;R11:Citrullination:1000.00
Q9Y6R7|FCGBP_HUMAN	K.L(+304.20)PVVLANGQIR(+.98).A	26.84	7.36	1483.9	8.5	742.962	148.78	1	30600	29500	33000	28900	21200	22800	52800	37800		1	0.97	1.08	0.94	0.69	0.75	1.73	1.24	1338	1348	iTRAQ 8plex (K N-term); Citrullination	L1:iTRAQ 8plex (K N-term):1000.00;R11:Citrullination:1000.00
Q66K79|CBPZ_HUMAN	K.E(+304.20)SLLNFVETVHR(+.98).G	21.48	5.21	1747.94	13.9	583.661	183.82	1	4090	2960	3480	3540	3070	3830	3720	2140		1	0.72	0.85	0.86	0.75	0.94	0.91	0.52	493	504	iTRAQ 8plex (K N-term); Citrullination	E1:iTRAQ 8plex (K N-term):1000.00;R12:Citrullination:1000.00
Q9H223|EHD4_HUMAN	R.A(+304.20)GGADAVQTVTGGLR(+.98).S	26.7	6.75	1676.89	9	839.462	119.03	1	8840	9190	11900	8830	9260	8170	10400	11200		1	1.04	1.35	1	1.05	0.92	1.18	1.27	15	29	iTRAQ 8plex (K N-term); Citrullination	A1:iTRAQ 8plex (K N-term):1000.00;R15:Citrullination:1000.00
P16870|CBPE_HUMAN	K.N(+304.20)SLISYLEQIHR(+.98).G	34.71	7.62	1776.96	5.3	593.331	176.68	1	3740	3220	3910	3180	2440	2370	2450	2180		1	0.86	1.05	0.85	0.65	0.64	0.66	0.58	363	374	iTRAQ 8plex (K N-term); Citrullination	N1:iTRAQ 8plex (K N-term):1000.00;R12:Citrullination:1000.00
P35579|MYH9_HUMAN	K.L(+304.20)DPHLVLDQLR(+.98).C	26.96	6.35	1622.92	17.3	541.991	172.7	0	4460	5540	4390	4800	4520	5210	3980	4150		1	1.24	0.98	1.08	1.01	1.17	0.89	0.93	683	693	iTRAQ 8plex (K N-term); Citrullination	L1:iTRAQ 8plex (K N-term):1000.00;R11:Citrullination:1000.00
Q96C24|SYTL4_HUMAN	R.Y(+304.20)EIPESLLAQR(+.98).T	32.69	7.52	1622.88	13.7	812.457	171.48	0	6380	5560	6580	5540	6240	5330	5890	5260		1	0.87	1.03	0.87	0.98	0.84	0.92	0.82	430	440	iTRAQ 8plex (K N-term); Citrullination	Y1:iTRAQ 8plex (K N-term):1000.00;R11:Citrullination:1000.00
Q96C24|SYTL4_HUMAN	K.T(+304.20)LNPHYNHTFVYNGVR(+.98).L	24.62	5.96	2236.13	16.7	746.396	96.07	0	5770	6580	4540	4980	5650	5020	3760	4330		1	1.14	0.79	0.86	0.98	0.87	0.65	0.75	573	588	iTRAQ 8plex (K N-term); Citrullination	T1:iTRAQ 8plex (K N-term):1000.00;R16:Citrullination:1000.00
Q9BV36|MELPH_HUMAN	K.L(+304.20)TDEEAQHVLEVVQR(+.98).D	59.9	12.66	2070.08	11.7	691.044	168.59	2	26500	26400	25800	24600	26200	22400	23200	24500		1	1	0.98	0.93	0.99	0.84	0.88	0.93	10	24	iTRAQ 8plex (K N-term); Citrullination	L1:iTRAQ 8plex (K N-term):1000.00;R15:Citrullination:1000.00
tr|J3QS39|J3QS39_HUMAN	R.T(+304.20)LSDYNIQK(+304.20)ESTLHLVLR(+.98)L.R	38.83	9.23	2851.62	1.8	713.913	147.02	1	13700	14100	14000	14600	19200	15400	14600	18400		1	1.03	1.02	1.06	1.4	1.12	1.06	1.34	55	73	iTRAQ 8plex (K N-term); Citrullination	T1:iTRAQ 8plex (K N-term):1000.00;K9:iTRAQ 8plex (K N-term):1000.00;R18:Citrullination:1000.00
tr|J3QS39|J3QS39_HUMAN	K.I(+304.20)QDK(+304.20)EGIPPDQQR(+.98).L	36.87	8.69	2132.16	12.2	711.735	75.42	2	128000	145000	150000	89000	120000	97300	89300	216000		1	1.13	1.17	0.7	0.94	0.76	0.7	1.69	30	42	iTRAQ 8plex (K N-term); Citrullination	I1:iTRAQ 8plex (K N-term):1000.00;K4:iTRAQ 8plex (K N-term):1000.00;R13:Citrullination:1000.00
tr|J3QS39|J3QS39_HUMAN	K.E(+304.20)GIPPDQQR(+.98).L	34.61	8.57	1343.69	9.2	672.86	49.78	7	565000	626000	712000	595000	762000	541000	772000	1030000		1	1.11	1.26	1.05	1.35	0.96	1.37	1.82	34	42	iTRAQ 8plex (K N-term); Citrullination	E1:iTRAQ 8plex (K N-term):1000.00;R9:Citrullination:1000.00
tr|F5H6Q2|F5H6Q2_HUMAN	R.T(+304.20)LSDYNIQK(+304.20)ESTLHLVLR(+.98)L.R	38.83	9.23	2851.62	1.8	713.913	147.02	1	13700	14100	14000	14600	19200	15400	14600	18400		1	1.03	1.02	1.06	1.4	1.12	1.06	1.34	55	73	iTRAQ 8plex (K N-term); Citrullination	T1:iTRAQ 8plex (K N-term):1000.00;K9:iTRAQ 8plex (K N-term):1000.00;R18:Citrullination:1000.00
tr|F5H6Q2|F5H6Q2_HUMAN	K.I(+304.20)QDK(+304.20)EGIPPDQQR(+.98).L	36.87	8.69	2132.16	12.2	711.735	75.42	2	128000	145000	150000	89000	120000	97300	89300	216000		1	1.13	1.17	0.7	0.94	0.76	0.7	1.69	30	42	iTRAQ 8plex (K N-term); Citrullination	I1:iTRAQ 8plex (K N-term):1000.00;K4:iTRAQ 8plex (K N-term):1000.00;R13:Citrullination:1000.00
tr|F5H6Q2|F5H6Q2_HUMAN	K.E(+304.20)GIPPDQQR(+.98).L	34.61	8.57	1343.69	9.2	672.86	49.78	7	565000	626000	712000	595000	762000	541000	772000	1030000		1	1.11	1.26	1.05	1.35	0.96	1.37	1.82	34	42	iTRAQ 8plex (K N-term); Citrullination	E1:iTRAQ 8plex (K N-term):1000.00;R9:Citrullination:1000.00
tr|F5H265|F5H265_HUMAN	R.T(+304.20)LSDYNIQK(+304.20)ESTLHLVLR(+.98)L.R	38.83	9.23	2851.62	1.8	713.913	147.02	1	13700	14100	14000	14600	19200	15400	14600	18400		1	1.03	1.02	1.06	1.4	1.12	1.06	1.34	55	73	iTRAQ 8plex (K N-term); Citrullination	T1:iTRAQ 8plex (K N-term):1000.00;K9:iTRAQ 8plex (K N-term):1000.00;R18:Citrullination:1000.00
tr|F5H265|F5H265_HUMAN	K.I(+304.20)QDK(+304.20)EGIPPDQQR(+.98).L	36.87	8.69	2132.16	12.2	711.735	75.42	2	128000	145000	150000	89000	120000	97300	89300	216000		1	1.13	1.17	0.7	0.94	0.76	0.7	1.69	30	42	iTRAQ 8plex (K N-term); Citrullination	I1:iTRAQ 8plex (K N-term):1000.00;K4:iTRAQ 8plex (K N-term):1000.00;R13:Citrullination:1000.00
tr|F5H265|F5H265_HUMAN	K.E(+304.20)GIPPDQQR(+.98).L	34.61	8.57	1343.69	9.2	672.86	49.78	7	565000	626000	712000	595000	762000	541000	772000	1030000		1	1.11	1.26	1.05	1.35	0.96	1.37	1.82	34	42	iTRAQ 8plex (K N-term); Citrullination	E1:iTRAQ 8plex (K N-term):1000.00;R9:Citrullination:1000.00
tr|F5GXK7|F5GXK7_HUMAN	R.T(+304.20)LSDYNIQK(+304.20)ESTLHLVLR(+.98)L.R	38.83	9.23	2851.62	1.8	713.913	147.02	1	13700	14100	14000	14600	19200	15400	14600	18400		1	1.03	1.02	1.06	1.4	1.12	1.06	1.34	55	73	iTRAQ 8plex (K N-term); Citrullination	T1:iTRAQ 8plex (K N-term):1000.00;K9:iTRAQ 8plex (K N-term):1000.00;R18:Citrullination:1000.00
tr|F5GXK7|F5GXK7_HUMAN	K.I(+304.20)QDK(+304.20)EGIPPDQQR(+.98).L	36.87	8.69	2132.16	12.2	711.735	75.42	2	128000	145000	150000	89000	120000	97300	89300	216000		1	1.13	1.17	0.7	0.94	0.76	0.7	1.69	30	42	iTRAQ 8plex (K N-term); Citrullination	I1:iTRAQ 8plex (K N-term):1000.00;K4:iTRAQ 8plex (K N-term):1000.00;R13:Citrullination:1000.00
tr|F5GXK7|F5GXK7_HUMAN	K.E(+304.20)GIPPDQQR(+.98).L	34.61	8.57	1343.69	9.2	672.86	49.78	7	565000	626000	712000	595000	762000	541000	772000	1030000		1	1.11	1.26	1.05	1.35	0.96	1.37	1.82	34	42	iTRAQ 8plex (K N-term); Citrullination	E1:iTRAQ 8plex (K N-term):1000.00;R9:Citrullination:1000.00
tr|Q5PY61|Q5PY61_HUMAN	R.T(+304.20)LSDYNIQK(+304.20)ESTLHLVLR(+.98)L.R	38.83	9.23	2851.62	1.8	713.913	147.02	1	13700	14100	14000	14600	19200	15400	14600	18400		1	1.03	1.02	1.06	1.4	1.12	1.06	1.34	55	73	iTRAQ 8plex (K N-term); Citrullination	T1:iTRAQ 8plex (K N-term):1000.00;K9:iTRAQ 8plex (K N-term):1000.00;R18:Citrullination:1000.00
tr|Q5PY61|Q5PY61_HUMAN	K.I(+304.20)QDK(+304.20)EGIPPDQQR(+.98).L	36.87	8.69	2132.16	12.2	711.735	75.42	2	128000	145000	150000	89000	120000	97300	89300	216000		1	1.13	1.17	0.7	0.94	0.76	0.7	1.69	30	42	iTRAQ 8plex (K N-term); Citrullination	I1:iTRAQ 8plex (K N-term):1000.00;K4:iTRAQ 8plex (K N-term):1000.00;R13:Citrullination:1000.00
tr|Q5PY61|Q5PY61_HUMAN	K.E(+304.20)GIPPDQQR(+.98).L	34.61	8.57	1343.69	9.2	672.86	49.78	7	565000	626000	712000	595000	762000	541000	772000	1030000		1	1.11	1.26	1.05	1.35	0.96	1.37	1.82	34	42	iTRAQ 8plex (K N-term); Citrullination	E1:iTRAQ 8plex (K N-term):1000.00;R9:Citrullination:1000.00
tr|J3QTR3|J3QTR3_HUMAN	R.T(+304.20)LSDYNIQK(+304.20)ESTLHLVLR(+.98)L.R	38.83	9.23	2851.62	1.8	713.913	147.02	1	13700	14100	14000	14600	19200	15400	14600	18400		1	1.03	1.02	1.06	1.4	1.12	1.06	1.34	55	73	iTRAQ 8plex (K N-term); Citrullination	T1:iTRAQ 8plex (K N-term):1000.00;K9:iTRAQ 8plex (K N-term):1000.00;R18:Citrullination:1000.00
tr|J3QTR3|J3QTR3_HUMAN	K.I(+304.20)QDK(+304.20)EGIPPDQQR(+.98).L	36.87	8.69	2132.16	12.2	711.735	75.42	2	128000	145000	150000	89000	120000	97300	89300	216000		1	1.13	1.17	0.7	0.94	0.76	0.7	1.69	30	42	iTRAQ 8plex (K N-term); Citrullination	I1:iTRAQ 8plex (K N-term):1000.00;K4:iTRAQ 8plex (K N-term):1000.00;R13:Citrullination:1000.00
tr|J3QTR3|J3QTR3_HUMAN	K.E(+304.20)GIPPDQQR(+.98).L	34.61	8.57	1343.69	9.2	672.86	49.78	7	565000	626000	712000	595000	762000	541000	772000	1030000		1	1.11	1.26	1.05	1.35	0.96	1.37	1.82	34	42	iTRAQ 8plex (K N-term); Citrullination	E1:iTRAQ 8plex (K N-term):1000.00;R9:Citrullination:1000.00
tr|F5GYU3|F5GYU3_HUMAN	R.T(+304.20)LSDYNIQK(+304.20)ESTLHLVLR(+.98)L.R	38.83	9.23	2851.62	1.8	713.913	147.02	1	13700	14100	14000	14600	19200	15400	14600	18400		1	1.03	1.02	1.06	1.4	1.12	1.06	1.34	55	73	iTRAQ 8plex (K N-term); Citrullination	T1:iTRAQ 8plex (K N-term):1000.00;K9:iTRAQ 8plex (K N-term):1000.00;R18:Citrullination:1000.00
tr|F5GYU3|F5GYU3_HUMAN	K.I(+304.20)QDK(+304.20)EGIPPDQQR(+.98).L	36.87	8.69	2132.16	12.2	711.735	75.42	2	128000	145000	150000	89000	120000	97300	89300	216000		1	1.13	1.17	0.7	0.94	0.76	0.7	1.69	30	42	iTRAQ 8plex (K N-term); Citrullination	I1:iTRAQ 8plex (K N-term):1000.00;K4:iTRAQ 8plex (K N-term):1000.00;R13:Citrullination:1000.00
tr|F5GYU3|F5GYU3_HUMAN	K.E(+304.20)GIPPDQQR(+.98).L	34.61	8.57	1343.69	9.2	672.86	49.78	7	565000	626000	712000	595000	762000	541000	772000	1030000		1	1.11	1.26	1.05	1.35	0.96	1.37	1.82	34	42	iTRAQ 8plex (K N-term); Citrullination	E1:iTRAQ 8plex (K N-term):1000.00;R9:Citrullination:1000.00
tr|F5H2Z3|F5H2Z3_HUMAN	R.T(+304.20)LSDYNIQK(+304.20)ESTLHLVLR(+.98)L.R	38.83	9.23	2851.62	1.8	713.913	147.02	1	13700	14100	14000	14600	19200	15400	14600	18400		1	1.03	1.02	1.06	1.4	1.12	1.06	1.34	55	73	iTRAQ 8plex (K N-term); Citrullination	T1:iTRAQ 8plex (K N-term):1000.00;K9:iTRAQ 8plex (K N-term):1000.00;R18:Citrullination:1000.00
tr|F5H2Z3|F5H2Z3_HUMAN	K.I(+304.20)QDK(+304.20)EGIPPDQQR(+.98).L	36.87	8.69	2132.16	12.2	711.735	75.42	2	128000	145000	150000	89000	120000	97300	89300	216000		1	1.13	1.17	0.7	0.94	0.76	0.7	1.69	30	42	iTRAQ 8plex (K N-term); Citrullination	I1:iTRAQ 8plex (K N-term):1000.00;K4:iTRAQ 8plex (K N-term):1000.00;R13:Citrullination:1000.00
tr|F5H2Z3|F5H2Z3_HUMAN	K.E(+304.20)GIPPDQQR(+.98).L	34.61	8.57	1343.69	9.2	672.86	49.78	7	565000	626000	712000	595000	762000	541000	772000	1030000		1	1.11	1.26	1.05	1.35	0.96	1.37	1.82	34	42	iTRAQ 8plex (K N-term); Citrullination	E1:iTRAQ 8plex (K N-term):1000.00;R9:Citrullination:1000.00
tr|B4DV12|B4DV12_HUMAN	R.T(+304.20)LSDYNIQK(+304.20)ESTLHLVLR(+.98)L.R	38.83	9.23	2851.62	1.8	713.913	147.02	1	13700	14100	14000	14600	19200	15400	14600	18400		1	1.03	1.02	1.06	1.4	1.12	1.06	1.34	55	73	iTRAQ 8plex (K N-term); Citrullination	T1:iTRAQ 8plex (K N-term):1000.00;K9:iTRAQ 8plex (K N-term):1000.00;R18:Citrullination:1000.00
tr|B4DV12|B4DV12_HUMAN	K.I(+304.20)QDK(+304.20)EGIPPDQQR(+.98).L	36.87	8.69	2132.16	12.2	711.735	75.42	2	128000	145000	150000	89000	120000	97300	89300	216000		1	1.13	1.17	0.7	0.94	0.76	0.7	1.69	30	42	iTRAQ 8plex (K N-term); Citrullination	I1:iTRAQ 8plex (K N-term):1000.00;K4:iTRAQ 8plex (K N-term):1000.00;R13:Citrullination:1000.00
tr|B4DV12|B4DV12_HUMAN	K.E(+304.20)GIPPDQQR(+.98).L	34.61	8.57	1343.69	9.2	672.86	49.78	7	565000	626000	712000	595000	762000	541000	772000	1030000		1	1.11	1.26	1.05	1.35	0.96	1.37	1.82	34	42	iTRAQ 8plex (K N-term); Citrullination	E1:iTRAQ 8plex (K N-term):1000.00;R9:Citrullination:1000.00
tr|F5H388|F5H388_HUMAN	R.T(+304.20)LSDYNIQK(+304.20)ESTLHLVLR(+.98)L.R	38.83	9.23	2851.62	1.8	713.913	147.02	1	13700	14100	14000	14600	19200	15400	14600	18400		1	1.03	1.02	1.06	1.4	1.12	1.06	1.34	55	73	iTRAQ 8plex (K N-term); Citrullination	T1:iTRAQ 8plex (K N-term):1000.00;K9:iTRAQ 8plex (K N-term):1000.00;R18:Citrullination:1000.00
tr|F5H388|F5H388_HUMAN	K.I(+304.20)QDK(+304.20)EGIPPDQQR(+.98).L	36.87	8.69	2132.16	12.2	711.735	75.42	2	128000	145000	150000	89000	120000	97300	89300	216000		1	1.13	1.17	0.7	0.94	0.76	0.7	1.69	30	42	iTRAQ 8plex (K N-term); Citrullination	I1:iTRAQ 8plex (K N-term):1000.00;K4:iTRAQ 8plex (K N-term):1000.00;R13:Citrullination:1000.00
tr|F5H388|F5H388_HUMAN	K.E(+304.20)GIPPDQQR(+.98).L	34.61	8.57	1343.69	9.2	672.86	49.78	7	565000	626000	712000	595000	762000	541000	772000	1030000		1	1.11	1.26	1.05	1.35	0.96	1.37	1.82	34	42	iTRAQ 8plex (K N-term); Citrullination	E1:iTRAQ 8plex (K N-term):1000.00;R9:Citrullination:1000.00
tr|F5H747|F5H747_HUMAN	R.T(+304.20)LSDYNIQK(+304.20)ESTLHLVLR(+.98)L.R	38.83	9.23	2851.62	1.8	713.913	147.02	1	13700	14100	14000	14600	19200	15400	14600	18400		1	1.03	1.02	1.06	1.4	1.12	1.06	1.34	55	73	iTRAQ 8plex (K N-term); Citrullination	T1:iTRAQ 8plex (K N-term):1000.00;K9:iTRAQ 8plex (K N-term):1000.00;R18:Citrullination:1000.00
tr|F5H747|F5H747_HUMAN	K.I(+304.20)QDK(+304.20)EGIPPDQQR(+.98).L	36.87	8.69	2132.16	12.2	711.735	75.42	2	128000	145000	150000	89000	120000	97300	89300	216000		1	1.13	1.17	0.7	0.94	0.76	0.7	1.69	30	42	iTRAQ 8plex (K N-term); Citrullination	I1:iTRAQ 8plex (K N-term):1000.00;K4:iTRAQ 8plex (K N-term):1000.00;R13:Citrullination:1000.00
tr|F5H747|F5H747_HUMAN	K.E(+304.20)GIPPDQQR(+.98).L	34.61	8.57	1343.69	9.2	672.86	49.78	7	565000	626000	712000	595000	762000	541000	772000	1030000		1	1.11	1.26	1.05	1.35	0.96	1.37	1.82	34	42	iTRAQ 8plex (K N-term); Citrullination	E1:iTRAQ 8plex (K N-term):1000.00;R9:Citrullination:1000.00
tr|J3QKN0|J3QKN0_HUMAN	R.T(+304.20)LSDYNIQK(+304.20)ESTLHLVLR(+.98)L.R	38.83	9.23	2851.62	1.8	713.913	147.02	1	13700	14100	14000	14600	19200	15400	14600	18400		1	1.03	1.02	1.06	1.4	1.12	1.06	1.34	55	73	iTRAQ 8plex (K N-term); Citrullination	T1:iTRAQ 8plex (K N-term):1000.00;K9:iTRAQ 8plex (K N-term):1000.00;R18:Citrullination:1000.00
tr|J3QKN0|J3QKN0_HUMAN	K.I(+304.20)QDK(+304.20)EGIPPDQQR(+.98).L	36.87	8.69	2132.16	12.2	711.735	75.42	2	128000	145000	150000	89000	120000	97300	89300	216000		1	1.13	1.17	0.7	0.94	0.76	0.7	1.69	30	42	iTRAQ 8plex (K N-term); Citrullination	I1:iTRAQ 8plex (K N-term):1000.00;K4:iTRAQ 8plex (K N-term):1000.00;R13:Citrullination:1000.00
tr|J3QKN0|J3QKN0_HUMAN	K.E(+304.20)GIPPDQQR(+.98).L	34.61	8.57	1343.69	9.2	672.86	49.78	7	565000	626000	712000	595000	762000	541000	772000	1030000		1	1.11	1.26	1.05	1.35	0.96	1.37	1.82	34	42	iTRAQ 8plex (K N-term); Citrullination	E1:iTRAQ 8plex (K N-term):1000.00;R9:Citrullination:1000.00
tr|Q96C32|Q96C32_HUMAN	R.T(+304.20)LSDYNIQK(+304.20)ESTLHLVLR(+.98)L.R	38.83	9.23	2851.62	1.8	713.913	147.02	1	13700	14100	14000	14600	19200	15400	14600	18400		1	1.03	1.02	1.06	1.4	1.12	1.06	1.34	55	73	iTRAQ 8plex (K N-term); Citrullination	T1:iTRAQ 8plex (K N-term):1000.00;K9:iTRAQ 8plex (K N-term):1000.00;R18:Citrullination:1000.00
tr|Q96C32|Q96C32_HUMAN	K.I(+304.20)QDK(+304.20)EGIPPDQQR(+.98).L	36.87	8.69	2132.16	12.2	711.735	75.42	2	128000	145000	150000	89000	120000	97300	89300	216000		1	1.13	1.17	0.7	0.94	0.76	0.7	1.69	30	42	iTRAQ 8plex (K N-term); Citrullination	I1:iTRAQ 8plex (K N-term):1000.00;K4:iTRAQ 8plex (K N-term):1000.00;R13:Citrullination:1000.00
tr|Q96C32|Q96C32_HUMAN	K.E(+304.20)GIPPDQQR(+.98).L	34.61	8.57	1343.69	9.2	672.86	49.78	7	565000	626000	712000	595000	762000	541000	772000	1030000		1	1.11	1.26	1.05	1.35	0.96	1.37	1.82	34	42	iTRAQ 8plex (K N-term); Citrullination	E1:iTRAQ 8plex (K N-term):1000.00;R9:Citrullination:1000.00
P0CG48|UBC_HUMAN	R.T(+304.20)LSDYNIQK(+304.20)ESTLHLVLR(+.98)L.R	38.83	9.23	2851.62	1.8	713.913	147.02	1	13700	14100	14000	14600	19200	15400	14600	18400		1	1.03	1.02	1.06	1.4	1.12	1.06	1.34	55	73	iTRAQ 8plex (K N-term); Citrullination	T1:iTRAQ 8plex (K N-term):1000.00;K9:iTRAQ 8plex (K N-term):1000.00;R18:Citrullination:1000.00
P0CG48|UBC_HUMAN	K.I(+304.20)QDK(+304.20)EGIPPDQQR(+.98).L	36.87	8.69	2132.16	12.2	711.735	75.42	2	128000	145000	150000	89000	120000	97300	89300	216000		1	1.13	1.17	0.7	0.94	0.76	0.7	1.69	30	42	iTRAQ 8plex (K N-term); Citrullination	I1:iTRAQ 8plex (K N-term):1000.00;K4:iTRAQ 8plex (K N-term):1000.00;R13:Citrullination:1000.00
P0CG48|UBC_HUMAN	K.E(+304.20)GIPPDQQR(+.98).L	34.61	8.57	1343.69	9.2	672.86	49.78	7	565000	626000	712000	595000	762000	541000	772000	1030000		1	1.11	1.26	1.05	1.35	0.96	1.37	1.82	34	42	iTRAQ 8plex (K N-term); Citrullination	E1:iTRAQ 8plex (K N-term):1000.00;R9:Citrullination:1000.00
O94760|DDAH1_HUMAN	R.A(+304.20)LPESLGQHALR(+.98).S	23.98	6.53	1595.89	10.1	532.976	104.12	0	17100	16700	15200	16900	15100	17900	16300	14000		1	0.98	0.89	0.99	0.88	1.05	0.95	0.82	20	31	iTRAQ 8plex (K N-term); Citrullination	A1:iTRAQ 8plex (K N-term):1000.00;R12:Citrullination:1000.00
Q08431|MFGM_HUMAN	K.N(+304.20)AVHVNLFETPVEAQYVR(+.98).L	42.77	9.21	2390.25	8.6	797.764	159.3	1	3850	5410	4100	4290	3830	3320	3000	3590		1	1.4	1.06	1.11	0.99	0.86	0.78	0.93	189	206	iTRAQ 8plex (K N-term); Citrullination	N1:iTRAQ 8plex (K N-term):1000.00;R18:Citrullination:1000.00
tr|Q32Q12|Q32Q12_HUMAN	R.T(+304.20)FIAIK(+304.20)PDGVQR(+.98).G	46.31	10.63	1953.14	13.3	652.063	112.94	2	48300	51100	38500	47100	45700	42600	36800	38900		1	1.06	0.8	0.98	0.95	0.88	0.76	0.8	32	43	iTRAQ 8plex (K N-term); Citrullination	T1:iTRAQ 8plex (K N-term):1000.00;K6:iTRAQ 8plex (K N-term):1000.00;R12:Citrullination:1000.00
tr|E7ERL0|E7ERL0_HUMAN	R.T(+304.20)FIAIK(+304.20)PDGVQR(+.98).G	46.31	10.63	1953.14	13.3	652.063	112.94	2	48300	51100	38500	47100	45700	42600	36800	38900		1	1.06	0.8	0.98	0.95	0.88	0.76	0.8	32	43	iTRAQ 8plex (K N-term); Citrullination	T1:iTRAQ 8plex (K N-term):1000.00;K6:iTRAQ 8plex (K N-term):1000.00;R12:Citrullination:1000.00
P15531|NDKA_HUMAN	R.T(+304.20)FIAIK(+304.20)PDGVQR(+.98).G	46.31	10.63	1953.14	13.3	652.063	112.94	2	48300	51100	38500	47100	45700	42600	36800	38900		1	1.06	0.8	0.98	0.95	0.88	0.76	0.8	7	18	iTRAQ 8plex (K N-term); Citrullination	T1:iTRAQ 8plex (K N-term):1000.00;K6:iTRAQ 8plex (K N-term):1000.00;R12:Citrullination:1000.00
tr|J3KPD9|J3KPD9_HUMAN	R.T(+304.20)FIAIK(+304.20)PDGVQR(+.98).G	46.31	10.63	1953.14	13.3	652.063	112.94	2	48300	51100	38500	47100	45700	42600	36800	38900		1	1.06	0.8	0.98	0.95	0.88	0.76	0.8	7	18	iTRAQ 8plex (K N-term); Citrullination	T1:iTRAQ 8plex (K N-term):1000.00;K6:iTRAQ 8plex (K N-term):1000.00;R12:Citrullination:1000.00
P61026|RAB10_HUMAN	R.N(+304.20)IDEHANEDVER(+.98).M	32.73	7.67	1744.81	5.5	582.614	51.83	1	6450	7360	7690	5790	8840	6150	7600	8780		1	1.14	1.19	0.9	1.37	0.95	1.18	1.36	106	117	iTRAQ 8plex (K N-term); Citrullination	N1:iTRAQ 8plex (K N-term):1000.00;R12:Citrullination:1000.00
Q04760|LGUL_HUMAN	K.D(+304.20)FLLQQTMLR(+.98).V	23.29	5.81	1568.85	8.5	785.438	176.91	2	13400	11200	18100	12500	11300	10900	12700	12800		1	0.83	1.35	0.93	0.84	0.81	0.94	0.95	29	38	iTRAQ 8plex (K N-term); Citrullination	D1:iTRAQ 8plex (K N-term):1000.00;R10:Citrullination:1000.00
P20339|RAB5A_HUMAN	R.G(+304.20)ATR(+.98)PNGPNTGNK(+304.20).I	22.1	5.9	1892.02	11.9	631.689	31.28	1	9960	10900	7120	7100	10700	9240	9050	12200		1	1.09	0.71	0.71	1.07	0.93	0.91	1.22	5	17	iTRAQ 8plex (K N-term); Citrullination	G1:iTRAQ 8plex (K N-term):1000.00;R4:Citrullination:1000.00;K13:iTRAQ 8plex (K N-term):1000.00
tr|E7EP32|E7EP32_HUMAN	R.A(+304.20)GVLAGHDNR(+.98).V	42.89	9.97	1313.69	8.1	438.909	47.24	1	14500	18500	16000	17000	15600	14100	11900	15200		1	1.28	1.11	1.17	1.08	0.98	0.82	1.05	261	270	iTRAQ 8plex (K N-term); Citrullination	A1:iTRAQ 8plex (K N-term):1000.00;R10:Citrullination:1000.00
P62879|GBB2_HUMAN	R.A(+304.20)GVLAGHDNR(+.98).V	42.89	9.97	1313.69	8.1	438.909	47.24	1	14500	18500	16000	17000	15600	14100	11900	15200		1	1.28	1.11	1.17	1.08	0.98	0.82	1.05	305	314	iTRAQ 8plex (K N-term); Citrullination	A1:iTRAQ 8plex (K N-term):1000.00;R10:Citrullination:1000.00
P62873|GBB1_HUMAN	R.A(+304.20)GVLAGHDNR(+.98).V	42.89	9.97	1313.69	8.1	438.909	47.24	1	14500	18500	16000	17000	15600	14100	11900	15200		1	1.28	1.11	1.17	1.08	0.98	0.82	1.05	305	314	iTRAQ 8plex (K N-term); Citrullination	A1:iTRAQ 8plex (K N-term):1000.00;R10:Citrullination:1000.00
tr|C9JKZ3|C9JKZ3_HUMAN	Y.E(+304.20)VHPAQYYPSPVPQYAPR(+.98).V	41.41	9.09	2403.21	7.9	802.084	120.99	1	10300	11700	9820	11200	10800	12400	9960	9900		1	1.13	0.95	1.09	1.04	1.2	0.97	0.96	38	55	iTRAQ 8plex (K N-term); Citrullination	E1:iTRAQ 8plex (K N-term):1000.00;R18:Citrullination:1000.00
tr|C9JKZ3|C9JKZ3_HUMAN	K.V(+304.20)LLIETQR(+.98).C	24.42	7.15	1275.77	10.4	638.896	135.62	1	55200	45200	54500	32900	35300	32400	31400	51700		1	0.82	0.99	0.6	0.64	0.59	0.57	0.94	402	409	iTRAQ 8plex (K N-term); Citrullination	V1:iTRAQ 8plex (K N-term):1000.00;R8:Citrullination:1000.00
O15393|TMPS2_HUMAN	Y.E(+304.20)VHPAQYYPSPVPQYAPR(+.98).V	41.41	9.09	2403.21	7.9	802.084	120.99	1	10300	11700	9820	11200	10800	12400	9960	9900		1	1.13	0.95	1.09	1.04	1.2	0.97	0.96	38	55	iTRAQ 8plex (K N-term); Citrullination	E1:iTRAQ 8plex (K N-term):1000.00;R18:Citrullination:1000.00
O15393|TMPS2_HUMAN	K.V(+304.20)LLIETQR(+.98).C	24.42	7.15	1275.77	10.4	638.896	135.62	1	55200	45200	54500	32900	35300	32400	31400	51700		1	0.82	0.99	0.6	0.64	0.59	0.57	0.94	402	409	iTRAQ 8plex (K N-term); Citrullination	V1:iTRAQ 8plex (K N-term):1000.00;R8:Citrullination:1000.00
tr|A0A2R8Y478|A0A2R8Y478_HUMAN	K.D(+304.20)EPQR(+.98)ETLK(+304.20).A	25.29	6.84	1723.95	10.4	575.662	49.08	0	19700	27300	21800	16900	26200	17500	21000	49300		1	1.39	1.11	0.86	1.33	0.89	1.07	2.51	67	75	iTRAQ 8plex (K N-term); Citrullination	D1:iTRAQ 8plex (K N-term):1000.00;R5:Citrullination:1000.00;K9:iTRAQ 8plex (K N-term):1000.00
tr|A0A2R8Y478|A0A2R8Y478_HUMAN	K.T(+304.20)K(+304.20)DEPQR(+.98)ETLK(+304.20).A	23.24	6.75	2257.29	12.8	565.337	51.06	1	63200	82900	39600	48200	66100	45400	46700	138000		1	1.31	0.63	0.76	1.05	0.72	0.74	2.18	65	75	iTRAQ 8plex (K N-term); Citrullination	T1:iTRAQ 8plex (K N-term):1000.00;K2:iTRAQ 8plex (K N-term):1000.00;R7:Citrullination:1000.00;K11:iTRAQ 8plex (K N-term):1000.00
tr|A6NNI4|A6NNI4_HUMAN	K.D(+304.20)EPQR(+.98)ETLK(+304.20).A	25.29	6.84	1723.95	10.4	575.662	49.08	0	19700	27300	21800	16900	26200	17500	21000	49300		1	1.39	1.11	0.86	1.33	0.89	1.07	2.51	67	75	iTRAQ 8plex (K N-term); Citrullination	D1:iTRAQ 8plex (K N-term):1000.00;R5:Citrullination:1000.00;K9:iTRAQ 8plex (K N-term):1000.00
tr|A6NNI4|A6NNI4_HUMAN	K.T(+304.20)K(+304.20)DEPQR(+.98)ETLK(+304.20).A	23.24	6.75	2257.29	12.8	565.337	51.06	1	63200	82900	39600	48200	66100	45400	46700	138000		1	1.31	0.63	0.76	1.05	0.72	0.74	2.18	65	75	iTRAQ 8plex (K N-term); Citrullination	T1:iTRAQ 8plex (K N-term):1000.00;K2:iTRAQ 8plex (K N-term):1000.00;R7:Citrullination:1000.00;K11:iTRAQ 8plex (K N-term):1000.00
P21926|CD9_HUMAN	K.D(+304.20)EPQR(+.98)ETLK(+304.20).A	25.29	6.84	1723.95	10.4	575.662	49.08	0	19700	27300	21800	16900	26200	17500	21000	49300		1	1.39	1.11	0.86	1.33	0.89	1.07	2.51	136	144	iTRAQ 8plex (K N-term); Citrullination	D1:iTRAQ 8plex (K N-term):1000.00;R5:Citrullination:1000.00;K9:iTRAQ 8plex (K N-term):1000.00
P21926|CD9_HUMAN	K.T(+304.20)K(+304.20)DEPQR(+.98)ETLK(+304.20).A	23.24	6.75	2257.29	12.8	565.337	51.06	1	63200	82900	39600	48200	66100	45400	46700	138000		1	1.31	0.63	0.76	1.05	0.72	0.74	2.18	134	144	iTRAQ 8plex (K N-term); Citrullination	T1:iTRAQ 8plex (K N-term):1000.00;K2:iTRAQ 8plex (K N-term):1000.00;R7:Citrullination:1000.00;K11:iTRAQ 8plex (K N-term):1000.00
tr|G8JLH6|G8JLH6_HUMAN	K.D(+304.20)EPQR(+.98)ETLK(+304.20).A	25.29	6.84	1723.95	10.4	575.662	49.08	0	19700	27300	21800	16900	26200	17500	21000	49300		1	1.39	1.11	0.86	1.33	0.89	1.07	2.51	159	167	iTRAQ 8plex (K N-term); Citrullination	D1:iTRAQ 8plex (K N-term):1000.00;R5:Citrullination:1000.00;K9:iTRAQ 8plex (K N-term):1000.00
tr|G8JLH6|G8JLH6_HUMAN	K.T(+304.20)K(+304.20)DEPQR(+.98)ETLK(+304.20).A	23.24	6.75	2257.29	12.8	565.337	51.06	1	63200	82900	39600	48200	66100	45400	46700	138000		1	1.31	0.63	0.76	1.05	0.72	0.74	2.18	157	167	iTRAQ 8plex (K N-term); Citrullination	T1:iTRAQ 8plex (K N-term):1000.00;K2:iTRAQ 8plex (K N-term):1000.00;R7:Citrullination:1000.00;K11:iTRAQ 8plex (K N-term):1000.00
P18669|PGAM1_HUMAN	R.V(+304.20)LIAAHGNSLR(+.98).G	36.53	8.63	1454.85	11	485.961	89.17	1	12000	12700	8950	11500	10400	9090	8330	9520		1	1.06	0.75	0.96	0.86	0.76	0.69	0.79	181	191	iTRAQ 8plex (K N-term); Citrullination	V1:iTRAQ 8plex (K N-term):1000.00;R11:Citrullination:1000.00
P20142|PEPC_HUMAN	R.S(+304.20)YYSVYDLGNNR(+.98).V	51.97	11.61	1754.84	8.4	878.433	131.29	3	34200	26400	30300	34700	39200	35800	37400	21700		1	0.77	0.89	1.01	1.15	1.04	1.09	0.63	370	381	iTRAQ 8plex (K N-term); Citrullination	S1:iTRAQ 8plex (K N-term):1000.00;R12:Citrullination:1000.00
P22748|CAH4_HUMAN	K.D(+304.20)NVRPLQQLGQR(+.98).T	40.6	9.62	1727.95	11.4	576.998	79.23	0	34100	35600	36700	33800	32900	31500	36100	31400		1	1.04	1.08	0.99	0.96	0.92	1.06	0.92	268	279	iTRAQ 8plex (K N-term); Citrullination	D1:iTRAQ 8plex (K N-term):1000.00;R12:Citrullination:49.35
P00491|PNPH_HUMAN	R.L(+304.20)VFGFLNGR(+.98).A	25.2	6.67	1326.75	12	664.393	195.82	1	15400	17200	15300	14500	11600	13900	8740	10400		1	1.12	0.99	0.94	0.75	0.91	0.57	0.68	68	76	iTRAQ 8plex (K N-term); Citrullination	L1:iTRAQ 8plex (K N-term):1000.00;R9:Citrullination:1000.00
tr|C9J712|C9J712_HUMAN	K.D(+304.20)R(+.98)EGFFTNGLTLGAK(+304.20).K	31.32	7.39	2234.2	13.4	559.566	146.68	0	6980	7360	7150	6980	7960	7740	6530	6510		1	1.05	1.02	1	1.14	1.11	0.94	0.93	6	20	iTRAQ 8plex (K N-term); Citrullination	D1:iTRAQ 8plex (K N-term):1000.00;R2:Citrullination:1000.00;K15:iTRAQ 8plex (K N-term):1000.00
P35080|PROF2_HUMAN	K.D(+304.20)R(+.98)EGFFTNGLTLGAK(+304.20).K	31.32	7.39	2234.2	13.4	559.566	146.68	0	6980	7360	7150	6980	7960	7740	6530	6510		1	1.05	1.02	1	1.14	1.11	0.94	0.93	55	69	iTRAQ 8plex (K N-term); Citrullination	D1:iTRAQ 8plex (K N-term):1000.00;R2:Citrullination:1000.00;K15:iTRAQ 8plex (K N-term):1000.00
tr|F8W022|F8W022_HUMAN	K.V(+304.20)MSEFNNNFR(+.98).Q	37.77	9.32	1561.74	9.3	781.887	149.92	7	207000	204000	188000	197000	167000	140000	174000	180000		1	0.99	0.91	0.95	0.81	0.68	0.84	0.87	111	120	iTRAQ 8plex (K N-term); Citrullination	V1:iTRAQ 8plex (K N-term):1000.00;R10:Citrullination:1000.00
tr|F8VWK8|F8VWK8_HUMAN	K.V(+304.20)MSEFNNNFR(+.98).Q	37.77	9.32	1561.74	9.3	781.887	149.92	7	207000	204000	188000	197000	167000	140000	174000	180000		1	0.99	0.91	0.95	0.81	0.68	0.84	0.87	111	120	iTRAQ 8plex (K N-term); Citrullination	V1:iTRAQ 8plex (K N-term):1000.00;R10:Citrullination:1000.00
P08962|CD63_HUMAN	K.V(+304.20)MSEFNNNFR(+.98).Q	37.77	9.32	1561.74	9.3	781.887	149.92	7	207000	204000	188000	197000	167000	140000	174000	180000		1	0.99	0.91	0.95	0.81	0.68	0.84	0.87	111	120	iTRAQ 8plex (K N-term); Citrullination	V1:iTRAQ 8plex (K N-term):1000.00;R10:Citrullination:1000.00
P51153|RAB13_HUMAN	K.L(+304.20)QVWDTAGQER(+.98).F	21.69	5.97	1606.82	11.6	804.427	128.74	0	10600	12300	11700	12100	13500	10700	11900	11800		1	1.16	1.1	1.14	1.27	1.01	1.12	1.11	59	69	iTRAQ 8plex (K N-term); Citrullination	L1:iTRAQ 8plex (K N-term):1000.00;R11:Citrullination:1000.00
tr|A0A087X1K9|A0A087X1K9_HUMAN	R.A(+304.20)SFPQGPIGGANR(+.98).D	26.83	6.89	1575.83	9.4	788.928	100.54	1	10500	11000	10300	11000	11600	11100	10700	12200		1	1.04	0.97	1.05	1.1	1.05	1.01	1.16	86	98	iTRAQ 8plex (K N-term); Citrullination	A1:iTRAQ 8plex (K N-term):1000.00;R13:Citrullination:1000.00
tr|E5RGR0|E5RGR0_HUMAN	R.A(+304.20)SFPQGPIGGANR(+.98).D	26.83	6.89	1575.83	9.4	788.928	100.54	1	10500	11000	10300	11000	11600	11100	10700	12200		1	1.04	0.97	1.05	1.1	1.05	1.01	1.16	134	146	iTRAQ 8plex (K N-term); Citrullination	A1:iTRAQ 8plex (K N-term):1000.00;R13:Citrullination:1000.00
O75608|LYPA1_HUMAN	R.A(+304.20)SFPQGPIGGANR(+.98).D	26.83	6.89	1575.83	9.4	788.928	100.54	1	10500	11000	10300	11000	11600	11100	10700	12200		1	1.04	0.97	1.05	1.1	1.05	1.01	1.16	150	162	iTRAQ 8plex (K N-term); Citrullination	A1:iTRAQ 8plex (K N-term):1000.00;R13:Citrullination:1000.00
tr|B3KTU7|B3KTU7_HUMAN	R.G(+304.20)PPAPAPR(+.98)VAVTAQ	24.16	6.09	1635.92	14.3	546.322	41.68	1	22000	24100	20100	18900	24100	18700	21200	26500		1	1.09	0.91	0.86	1.1	0.85	0.96	1.2	482	495	iTRAQ 8plex (K N-term); Citrullination	G1:iTRAQ 8plex (K N-term):1000.00;R8:Citrullination:1000.00
Q9BSJ2|GCP2_HUMAN	R.G(+304.20)PPAPAPR(+.98)VAVTAQ	24.16	6.09	1635.92	14.3	546.322	41.68	1	22000	24100	20100	18900	24100	18700	21200	26500		1	1.09	0.91	0.86	1.1	0.85	0.96	1.2	889	902	iTRAQ 8plex (K N-term); Citrullination	G1:iTRAQ 8plex (K N-term):1000.00;R8:Citrullination:1000.00
p	224.187	0.941556	N.D.	79714	88137	N.D.	89621	90736	N.D.	94136	103876	97662	93708	82937
p	1328.97	0.950636	N.D.	87248	83468	55105	73266	71694	29677	72530	71249	104130	66935	68026
p	104.062	0.939143	N.D.	58208	40612	N.D.	36574	39819	N.D.	N.D.	38728	39590	31277	N.D.
p	220.108	0.9515	N.D.	25162	34509	N.D.	N.D.	N.D.	N.D.	22862	24072	N.D.	N.D.	N.D.
p	590.372	0.941	24154	28468	N.D.	21755	N.D.	N.D.	26655	N.D.	N.D.	N.D.	N.D.	N.D.
p	234.181	0.936333	N.D.	44835	76633	N.D.	46667	71195	N.D.	62039	57648	47129	58107	37861
p	420.239	0.940625	N.D.	44923	47383	N.D.	44781	50454	N.D.	58550	59458	N.D.	29447	46385
p	1019.72	0.931111	N.D.	7386	7554	N.D.	9601	58450	N.D.	7723	55871	10662	8000	55438
p	192.15	0.9376	N.D.	12947	N.D.	N.D.	36628	N.D.	N.D.	N.D.	N.D.	17475	10555	15554
p	487.346	0.940875	N.D.	45526	38477	N.D.	38317	N.D.	N.D.	36884	34404	35073	37913	32217
p	264.208	0.950571	14298	20537	N.D.	N.D.	15603	29500	N.D.	N.D.	25921	18999	17287	N.D.
p	269.201	0.9595	N.D.	12719	13738	N.D.	N.D.	N.D.	N.D.	N.D.	N.D.	N.D.	N.D.	N.D.
p	190.17	0.951333	N.D.	11656	15670	N.D.	N.D.	N.D.	N.D.	12308	N.D.	N.D.	N.D.	N.D.
p	348.245	0.935667	N.D.	90565	83838	N.D.	N.D.	N.D.	N.D.	52843	N.D.	N.D.	N.D.	N.D.
p	377.202	0.944333	59785	88986	88025	50759	77324	81027	48347	74412	86136	77613	73851	82437
p	254.187	0.9485	N.D.	37327	41504	N.D.	40784	N.D.	N.D.	48093	55221	42584	43658	46787
p	278.221	0.944857	N.D.	23776	N.D.	N.D.	18776	N.D.	N.D.	23180	21005	21275	24925	23459
p	238.192	0.9421	12798	18694	N.D.	22207	25006	32391	N.D.	25456	16445	18615	28938	23192
p	1311.95	0.9429	N.D.	12855	14643	11071	14789	15644	N.D.	16098	14240	29997	14740	14844
p	380.3	0.943333	N.D.	62615	N.D.	N.D.	26414	N.D.	15379	23377	13927	N.D.	71587	N.D.
p	315.275	0.9515	N.D.	17101	9182	N.D.	N.D.	N.D.	N.D.	9191	N.D.	N.D.	14903	N.D.
p	287.243	0.950333	N.D.	10092	10860	N.D.	5639	N.D.	N.D.	N.D.	N.D.	N.D.	N.D.	N.D.
p	1387.01	0.9613	N.D.	87847	N.D.	47857	71584	73962	31450	66749	69184	119992	62824	69158
p	429.307	0.95525	N.D.	19067	N.D.	N.D.	N.D.	16646	N.D.	N.D.	N.D.	14466	N.D.	17053
p	487.226	0.9384	N.D.	10802	17408	9706	N.D.	15788	N.D.	N.D.	12509	N.D.	N.D.	N.D.
p	598.375	0.944429	N.D.	10459	26619	N.D.	N.D.	15105	N.D.	17257	18491	N.D.	16704	16617
p	148.051	0.95	N.D.	136023	121021	N.D.	143536	136021	N.D.	144402	145274	140954	127403	140780
p	569.445	0.959546	N.D.	105548	80979	49765	76750	75296	33702	75695	72408	74716	72565	65109
p	240.167	0.955875	N.D.	67008	45300	38542	19206	18759	N.D.	150472	N.D.	39825	N.D.	18228
p	508.393	0.96575	N.D.	38116	13836	N.D.	98336	17678	55795	12224	18858	N.D.	N.D.	18678
p	296.233	0.950667	N.D.	41013	N.D.	N.D.	N.D.	43407	N.D.	36405	N.D.	40984	51283	51439
p	472.325	0.952875	N.D.	38200	20652	N.D.	N.D.	59037	N.D.	28360	27136	36441	22235	21748
p	462.289	0.9566	25636	25576	N.D.	N.D.	N.D.	36018	N.D.	N.D.	23638	43001	N.D.	N.D.
p	349.264	0.9461	49888	71493	139985	N.D.	89974	126514	N.D.	75599	140357	106793	180315	139152
p	182.166	0.95275	N.D.	35367	7332	N.D.	7574	16924	N.D.	37582	28725	5997	N.D.	28516
p	315.92	0.9574	N.D.	19944	27627	N.D.	28220	N.D.	N.D.	N.D.	27171	N.D.	N.D.	25492
p	266.223	0.95425	N.D.	20649	19030	N.D.	N.D.	N.D.	N.D.	N.D.	9754	24816	N.D.	N.D.
p	140.119	0.949445	N.D.	94885	62369	N.D.	10226	83709	N.D.	94030	102660	66680	50221	54829
p	467.378	0.969091	N.D.	91607	71360	56967	81213	68818	49908	72070	67935	72383	74575	69833
p	671.51	0.966429	N.D.	38529	27707	N.D.	30376	27466	15464	N.D.	N.D.	30110	22840	N.D.
p	1445.05	0.972909	N.D.	81050	63488	50847	65784	64278	33462	60372	64829	140759	60243	64639
p	290.244	0.9685	N.D.	20325	55965	12025	21701	N.D.	N.D.	20650	50171	14166	11447	N.D.
p	354.274	0.9635	N.D.	34299	27983	N.D.	N.D.	N.D.	N.D.	23752	N.D.	N.D.	N.D.	28565
p	457.336	0.963	N.D.	36372	18534	N.D.	N.D.	N.D.	N.D.	N.D.	N.D.	11269	N.D.	N.D.
p	428.369	0.9682	N.D.	13743	N.D.	N.D.	N.D.	N.D.	N.D.	9886	N.D.	9374	15073	10490
p	314.113	0.965818	N.D.	146111	149978	112706	142911	142333	60815	140199	135808	122848	134148	140605
p	320.233	0.975	N.D.	25856	123969	74200	N.D.	N.D.	15431	N.D.	N.D.	N.D.	N.D.	N.D.
p	525.419	0.977333	N.D.	121534	79150	72105	N.D.	81747	N.D.	77496	84698	85377	75924	76172
p	262.228	0.9746	N.D.	26809	N.D.	N.D.	N.D.	8975	N.D.	N.D.	13334	20785	9473	N.D.
p	362.301	1.0035	N.D.	94772	66826	58871	N.D.	N.D.	N.D.	N.D.	N.D.	53127	61688	31006
p	243.254	0.9746	N.D.	61366	83223	58900	77879	80872	N.D.	76427	75974	84646	81935	78624
p	406.325	0.99925	53060	151246	95519	93605	83972	99069	100004	34061	87641	97075	10405	103211
p	1561.13	0.992667	N.D.	50791	37978	N.D.	27622	40302	N.D.	25067	34735	101494	25072	49780
p	627.486	0.984444	N.D.	44532	34333	N.D.	35369	31868	29815	27794	31943	N.D.	33476	30600
p	729.547	0.977429	N.D.	12161	125656	11567	12922	N.D.	N.D.	10176	11902	N.D.	14816	N.D.
p	269.27	1.00325	N.D.	23658	33063	N.D.	N.D.	28157	N.D.	N.D.	34760	N.D.	N.D.	N.D.
p	791.701	1.00643	120722	60553	231846	N.D.	N.D.	N.D.	N.D.	322498	88966	395257	532479	N.D.
p	481.394	1.00927	N.D.	121062	79103	68631	82877	72113	68232	73697	79946	98507	74392	80026
p	685.523	1.0055	N.D.	18755	19716	17370	N.D.	22248	N.D.	N.D.	N.D.	27656	N.D.	19512
p	360.333	1.0044	N.D.	12882	14015	11057	14313	17258	N.D.	14669	12609	15232	12229	13707
p	437.368	1.0161	18708	52534	30607	N.D.	31747	31923	N.D.	42802	31424	40866	23353	32222
p	246.217	1.01618	N.D.	30352	53806	26754	46964	36817	43149	31999	55034	51257	40131	73337
p	583.46	1.01764	21818	51951	36142	28593	36207	33919	N.D.	30298	37341	54326	33015	35731
p	266.162	1.02057	N.D.	41042	N.D.	N.D.	36377	45899	N.D.	64605	74801	N.D.	36627	66052
p	287.28	1.028	N.D.	53277	66296	102481	87931	65285	N.D.	67303	65759	N.D.	N.D.	71459
p	401.347	1.0455	23611	25753	25353	N.D.	N.D.	29278	N.D.	28692	N.D.	N.D.	N.D.	27552
p	90.0461	1.10167	146339	136705	702924	844940	645448	795243	744119	683020	819047	798204	785132	720534
p	197.119	1.112	277673	268474	N.D.	N.D.	N.D.	N.D.	N.D.	N.D.	N.D.	N.D.	N.D.	N.D.
p	273.026	1.1685	18301	11031	N.D.	N.D.	20199	17288	N.D.	16617	13209	N.D.	17206	16851
p	148.051	1.2965	N.D.	44810	N.D.	N.D.	46346	N.D.	N.D.	N.D.	N.D.	N.D.	47688	50095
p	224.187	1.31758	33560	27468	30105	33007	34903	31212	31020	43979	39259	35078	31356	40031
p	437.368	1.45267	N.D.	37664	N.D.	N.D.	N.D.	N.D.	N.D.	13659	26878	N.D.	N.D.	N.D.
p	273.026	1.54333	12062	11698	N.D.	12569	N.D.	N.D.	14032	12540	N.D.	N.D.	N.D.	11480
p	364.126	1.6888	N.D.	31333	27754	31698	N.D.	38622	38677	29211	31696	36638	29634	35699
p	162.067	1.69571	N.D.	35550	28708	N.D.	34108	N.D.	N.D.	38495	N.D.	34464	28775	34771
p	331.253	1.70511	27218	25766	34103	31587	27699	28792	N.D.	32165	25288	N.D.	N.D.	28931
p	371.245	1.7085	41869	36276	39005	44889	N.D.	N.D.	N.D.	N.D.	N.D.	N.D.	N.D.	N.D.
p	410.083	1.72714	18002	10165	N.D.	25907	6252	N.D.	18986	N.D.	N.D.	12195	13584	N.D.
p	240.228	1.753	N.D.	29450	27579	N.D.	25416	N.D.	N.D.	28299	25851	N.D.	26416	N.D.
p	257.234	1.7575	101517	163092	208200	249947	205958	174497	182807	221025	217976	119301	133686	178007
p	199.192	1.92673	15134	22937	16189	21258	14893	10514	16424	24557	17647	N.D.	26387	20578
p	266.176	1.9718	N.D.	390430	377917	313712	374119	339905	N.D.	349850	332109	376245	428623	375991
p	299.983	2.04267	10213	12735	19829	N.D.	N.D.	18039	13666	N.D.	11204	11896	13882	14345
p	278.293	2.06562	N.D.	16298	8299	16872	N.D.	N.D.	10880	12760	16756	N.D.	13094	17787
p	303.291	2.0675	184071	287812	204493	140232	161139	106813	174497	165716	128470	203560	233463	148920
p	227.26	2.07717	6437693	345379	1535151	76405	135639	222175	972076	96744	78325	187169	283145	91170
p	297.264	2.29225	N.D.	58381	N.D.	35785	N.D.	N.D.	N.D.	32441	28594	N.D.	N.D.	N.D.
p	355.316	2.29038	14566	27889	N.D.	14458	N.D.	N.D.	N.D.	19094	11388	19326	50180	26248
p	350.296	2.36943	52493	53700	31560	N.D.	63288	57969	N.D.	N.D.	N.D.	57892	N.D.	53395
p	292.308	2.43333	222575	218114	210620	223886	135377	205092	208306	229315	148461	242222	218279	215888
p	291.301	2.44075	9678	7934	10630	N.D.	N.D.	N.D.	N.D.	N.D.	N.D.	N.D.	11795	N.D.
p	484.1	2.5322	N.D.	11823	N.D.	31907	N.D.	N.D.	23368	N.D.	N.D.	15555	17045	N.D.
p	173.119	2.66825	32370	27136	N.D.	22777	27863	24953	27672	26975	N.D.	32142	N.D.	N.D.
p	310.284	2.70133	12136	14453	13972	N.D.	N.D.	N.D.	11515	18143	N.D.	N.D.	N.D.	15046
p	229.238	2.76725	50780	122271	N.D.	30614	N.D.	N.D.	N.D.	N.D.	23144	N.D.	N.D.	N.D.
p	678.064	2.79375	N.D.	7387	N.D.	N.D.	N.D.	N.D.	7380	N.D.	10138	N.D.	20044	N.D.
p	498.203	2.8116	N.D.	41602	N.D.	100594	N.D.	57466	67554	N.D.	N.D.	N.D.	184943	N.D.
p	350.296	2.8059	41028	43450	45099	N.D.	41622	57312	N.D.	46423	51544	48769	51040	48923
p	331.322	2.8275	80879	130577	82092	64493	77869	55842	74434	90227	61708	87102	103605	73291
p	674.569	2.8457	197668	248928	N.D.	253156	261849	N.D.	235215	247697	266626	156978	217573	238776
p	763.501	2.849	102289	137066	146917	131385	156562	163115	124526	149684	155521	61172	121544	135788
p	217.24	2.84842	29432	36213	33444	31205	28396	28278	31611	36070	28790	35802	36487	32140
p	306.325	2.85017	30000000	30100000	29500000	30200000	29500000	29000000	30600000	30300000	30000000	31700000	20200000	30100000
p	258.304	2.85067	497734	494088	490446	497893	466634	461890	503302	509040	492781	513608	496570	495573
p	304.311	2.85414	37822	35344	38772	N.D.	34566	44543	N.D.	N.D.	41556	47382	N.D.	N.D.
p	253.276	2.85108	250362	239456	240313	253744	262755	241705	266037	252385	266159	288643	258608	277258
p	368.245	2.849	96088	120952	117434	133321	127368	146772	127532	124104	130981	74064	120530	117170
p	626.468	2.85775	N.D.	22578	21305	N.D.	25846	N.D.	N.D.	N.D.	26712	N.D.	N.D.	N.D.
p	404.291	2.84908	36898	43030	38297	41110	45325	44914	44534	45534	46627	36332	40573	44983
p	305.318	2.85417	1287546	1294383	1273955	1313375	1252247	1244496	1297472	1306771	1256772	1381815	1298315	1294604
p	856.582	2.85492	71882	70730	69875	75561	70887	73074	76516	71390	71653	61008	73014	74870
p	852.432	2.84873	14390	22269	26253	21452	26977	29802	20088	24353	29062	N.D.	17928	22274
p	680.477	2.85218	20388	20789	19427	20148	19357	18644	19794	N.D.	19879	20748	18531	20444
p	409.27	2.84873	26584	85123	86356	92726	100189	105236	86580	106065	89012	N.D.	94471	101568
p	515.229	2.8456	N.D.	93860	N.D.	88347	N.D.	71214	81241	N.D.	N.D.	27394	N.D.	N.D.
p	587.134	2.883	40749	113593	21561	51755	N.D.	73613	N.D.	142480	25336	N.D.	114772	24233
p	457.176	2.88271	25957	28383	N.D.	43008	39611	N.D.	N.D.	N.D.	31206	N.D.	37326	21911
p	498.203	2.8895	136577	67981	209078	N.D.	131961	82985	N.D.	218556	151883	N.D.	N.D.	207597
p	678.064	2.9254	8755	12985	N.D.	N.D.	N.D.	12871	8177	28118	N.D.	N.D.	N.D.	N.D.
p	421.423	2.98855	23526	22742	N.D.	22262	24636	23758	23441	24179	23998	26063	24463	24982
p	351.311	3.04733	24503	20849	N.D.	N.D.	N.D.	26181	N.D.	N.D.	N.D.	N.D.	N.D.	N.D.
p	376.365	3.06243	N.D.	10558	11176	11202	N.D.	N.D.	5830	N.D.	11275	10281	9998	N.D.
p	308.336	3.08356	50759	43050	47966	44249	44595	N.D.	47656	48187	N.D.	46706	43248	N.D.
p	301.296	3.11778	269206	204510	216497	N.D.	N.D.	N.D.	31905	29284	27438	263976	234642	216246
p	357.288	3.1372	N.D.	74453	N.D.	N.D.	73325	60485	N.D.	68692	N.D.	N.D.	73489	N.D.
p	401.347	3.15483	61609	115652	59264	N.D.	72023	N.D.	N.D.	51034	N.D.	51922	N.D.	N.D.
p	574.059	3.20478	209018	199874	156553	316849	299875	266902	N.D.	N.D.	174043	165157	N.D.	254238
p	484.43	3.256	6470	10971	N.D.	N.D.	N.D.	N.D.	N.D.	9707	N.D.	7230	27319	9583
p	348.371	3.296	204808	233524	224454	220619	206853	182728	224159	230501	231510	251938	202605	217911
p	320.339	3.32075	15977	15354	12570	9793	13254	13048	15490	10114	12872	15474	9386	14883
p	290.329	3.405	8853	9445	N.D.	8984	N.D.	N.D.	N.D.	N.D.	N.D.	N.D.	8640	N.D.
p	581.481	3.43933	N.D.	73649	N.D.	N.D.	N.D.	N.D.	63184	54222	N.D.	N.D.	N.D.	N.D.
p	213.244	3.439	3343256	824031	652968	682101	719055	528631	817371	393215	707600	486651	506240	505538
p	483.004	3.445	29138	18607	20846	27220	19118	N.D.	29457	18791	N.D.	18324	18465	24779
p	574.058	3.45133	665914	632128	691963	560016	608984	665452	692096	674758	717650	542989	700175	605304
p	425.029	3.44767	N.D.	24978	N.D.	N.D.	29381	44059	38950	28142	26498	22796	35396	40491
p	550.091	3.44629	16605	15460	N.D.	N.D.	19339	22868	N.D.	16433	N.D.	31888	18417	N.D.
p	599.241	3.45578	13849	14825	N.D.	16000	N.D.	12663	15619	N.D.	14588	26820	12665	16819
p	570.189	3.45257	32593	24357	N.D.	24425	29814	24178	N.D.	N.D.	N.D.	83977	22373	N.D.
p	534.118	3.45455	14062	9943	12111	15161	16133	14580	18043	13629	10870	31946	15595	N.D.
p	662.99	3.44686	N.D.	8954	14341	10171	38777	30996	N.D.	26631	11062	N.D.	N.D.	N.D.
p	1967.43	3.5815	62791	75824	67252	49540	75631	78195	64154	N.D.	66597	234359	N.D.	65674
p	255.254	3.5545	39448	57197	14364	41378	21060	N.D.	25674	43640	33031	35807	N.D.	51621
p	352.331	3.6596	N.D.	22627	N.D.	23540	N.D.	N.D.	17983	N.D.	16300	17343	N.D.	N.D.
p	506.09	3.658	21093	50860	13977	N.D.	19872	N.D.	N.D.	14643	16614	N.D.	N.D.	N.D.
p	353.328	3.65	N.D.	35624	22900	N.D.	N.D.	N.D.	25169	N.D.	N.D.	N.D.	N.D.	N.D.
p	2025.47	3.754	104640	89905	95843	99525	97171	N.D.	96467	103227	97463	N.D.	97757	86552
p	377.212	3.73833	117522	98232	104842	116251	117112	163058	110935	132376	104458	114771	109456	179001
p	335.306	3.744	197720	220120	202694	41028	253680	253241	226809	189057	226590	160814	195011	188421
p	312.264	3.757	N.D.	72088	72185	N.D.	41113	34264	47368	N.D.	N.D.	66519	103638	N.D.
p	330.275	3.75858	562501	385859	498581	305150	313057	266325	265638	355475	287490	420539	511902	490292
p	281.27	3.76189	69153	22096	N.D.	26317	N.D.	N.D.	19771	53728	18077	24969	18730	63158
p	2083.51	3.91364	122756	131120	123253	130905	127439	133005	128501	128242	126549	N.D.	109594	129883
p	361.294	3.97017	16095	8391	17144	10909	N.D.	N.D.	N.D.	N.D.	N.D.	8624	N.D.	13722
p	443.369	4.01125	217264	215275	192590	132706	N.D.	133138	N.D.	167761	N.D.	86923	N.D.	247822
p	423.273	4.0085	75616	84510	85403	N.D.	N.D.	N.D.	N.D.	54486	40491	64166	57390	89789
p	243.181	4.00933	17166	42734	N.D.	N.D.	30032	N.D.	N.D.	N.D.	N.D.	N.D.	N.D.	N.D.
p	2141.56	4.0527	140905	151161	139849	125305	155009	137712	146501	N.D.	147425	468763	N.D.	151074
p	227.187	3.99625	111091	104153	135438	74719	75450	81665	78331	88113	54521	85571	70121	48324
p	602.16	4.02689	15984	10089	10635	13205	N.D.	4638	9989	N.D.	14118	30583	19458	N.D.
p	544.107	4.0524	32627	23417	25856	29771	N.D.	N.D.	27184	28344	31976	70966	43190	27155
p	606.03	4.05808	590258	438323	502720	544878	415302	370807	480291	547439	635211	656951	791272	621645
p	638.001	4.05525	51795	58818	70350	N.D.	93227	N.D.	66254	N.D.	N.D.	62560	49398	84727
p	483.253	4.09773	16862	13504	13833	14921	16848	17577	15313	17050	N.D.	16727	15805	16045
p	739.208	4.17275	14058	11028	N.D.	N.D.	N.D.	17206	N.D.	N.D.	N.D.	48605	N.D.	N.D.
p	367.342	4.1325	84282	237959	191909	86263	140837	37987	92141	185149	83806	175076	141825	76739
p	738.874	4.159	15617	17008	N.D.	N.D.	N.D.	N.D.	N.D.	N.D.	N.D.	52437	N.D.	N.D.
p	2199.6	4.18975	140253	165219	158976	171144	174942	164838	161604	164815	130986	519888	142129	163987
p	344.287	4.166	N.D.	31298	33779	37905	28073	42669	N.D.	46518	N.D.	53141	51269	43040
p	523.44	4.18878	24387	24214	20941	N.D.	23117	N.D.	N.D.	23947	27143	29179	24115	23962
p	377.211	4.1964	35435	30484	57288	44704	44802	37145	33504	44049	35414	N.D.	32103	N.D.
p	629.18	4.2495	N.D.	22609	18397	N.D.	N.D.	N.D.	N.D.	N.D.	N.D.	N.D.	N.D.	N.D.
p	361.293	4.25329	N.D.	15292	16208	13335	N.D.	N.D.	12782	10991	N.D.	N.D.	9749	14850
p	423.272	4.2583	29966	37180	34476	27065	26664	N.D.	28844	N.D.	15132	20615	19334	31168
p	243.182	4.2589	20857	28561	31181	31408	30501	24934	34119	26942	N.D.	N.D.	14001	24317
p	443.368	4.25667	66087	75183	74607	44192	51838	44093	55246	41547	32035	40879	48637	68062
p	227.187	4.25827	38473	65302	70549	53139	43676	54418	59090	46518	N.D.	47127	37087	67069
p	407.297	4.21733	71278	77075	79994	48927	55635	51370	65215	209194	38769	147194	54050	79669
p	225.171	4.12314	30702	16842	21567	N.D.	N.D.	N.D.	36042	27964	8352	N.D.	N.D.	38076
p	632.136	4.2612	N.D.	16813	21770	27400	24382	23482	24589	19595	21577	N.D.	20723	21407
p	758.222	4.31427	N.D.	20844	13863	19379	21224	19183	20125	12130	20077	65257	17940	19701
p	2257.64	4.31858	167955	157063	155853	164600	170901	172287	159136	158914	167200	533606	153333	171409
p	758.555	4.31575	N.D.	25325	24324	N.D.	N.D.	31296	N.D.	N.D.	N.D.	68278	N.D.	N.D.
p	479.414	4.3648	34780	31766	26724	40065	23008	20949	N.D.	27805	N.D.	37449	30422	25435
p	2315.68	4.435	155858	155099	152400	150044	158874	160795	149786	156715	157728	489743	146460	150315
p	777.902	4.4295	22979	22755	22710	23285	26375	24537	19031	N.D.	21229	70481	N.D.	21803
p	578.513	4.453	138725	127335	N.D.	N.D.	N.D.	N.D.	N.D.	N.D.	N.D.	N.D.	N.D.	102488
p	283.286	4.45745	58254	77972	53837	58286	59614	67657	59305	N.D.	48984	58209	79877	64121
p	335.316	4.48383	52453	66080	34017	N.D.	N.D.	N.D.	N.D.	N.D.	44915	N.D.	30519	32488
p	797.249	4.5461	N.D.	22713	22640	21097	23148	24572	18780	21296	22987	73698	N.D.	21921
p	796.915	4.54444	N.D.	21770	22088	N.D.	22677	23580	17861	19252	N.D.	68854	20238	23441
p	2373.72	4.54683	133725	130868	130162	130052	130170	133314	120604	125669	137506	411566	123340	134525
p	539.239	4.524	N.D.	53327	51379	N.D.	N.D.	N.D.	48374	45718	N.D.	N.D.	N.D.	N.D.
p	435.389	4.5725	38179	34842	30433	34662	27685	29376	36829	26872	N.D.	35168	N.D.	28540
p	816.597	4.6461	24246	21926	26428	N.D.	N.D.	27811	22184	26339	24734	81272	25998	23951
p	309.301	4.61313	184802	169914	N.D.	103803	117180	163630	287653	N.D.	N.D.	184666	N.D.	223970
p	816.262	4.64318	13525	20119	18214	21325	21355	19854	19301	N.D.	22675	62417	17718	20156
p	1909.39	4.6211	49036	48670	N.D.	49859	48339	46732	33170	N.D.	51977	41941	53092	48426
p	2431.76	4.65158	99911	101778	101752	98960	93483	102439	91733	100433	100664	318632	96541	101521
p	340.295	4.65671	72053	50919	53537	N.D.	N.D.	N.D.	N.D.	38388	43019	N.D.	69196	43464
p	358.305	4.66783	535688	418461	472517	203967	248358	221308	336557	283389	340016	429648	520093	321519
p	700.602	4.6738	7818	7625	5719	6454	7562	N.D.	N.D.	N.D.	N.D.	N.D.	N.D.	N.D.
p	758.657	4.67625	7953	6926	8157	6729	7359	6649	8826	9787	7410	8716	7929	9444
p	627.182	4.692	N.D.	29663	N.D.	N.D.	28928	33887	31858	37853	36033	N.D.	N.D.	25381
p	267.184	4.68912	17330	16265	N.D.	19574	N.D.	15721	N.D.	20985	N.D.	18109	20778	18146
p	539.239	4.6845	70429	67936	59601	N.D.	N.D.	75309	70778	71476	81084	95026	80951	104570
p	1967.43	4.71936	64505	60061	60462	60854	N.D.	65966	68117	71601	64112	64447	62313	66973
p	835.944	4.74656	16902	18970	16560	N.D.	16044	16183	7881	N.D.	4392	53197	N.D.	15631
p	2489.8	4.74783	69419	68387	66461	67138	71863	73026	65759	67751	62929	224229	62220	64991
p	835.61	4.74943	N.D.	19071	18725	15839	17852	17440	15777	N.D.	N.D.	53052	N.D.	N.D.
p	370.305	4.7405	284801	283255	304616	N.D.	285878	206364	283045	274411	539893	N.D.	275254	264286
p	394.302	4.76583	N.D.	45233	42382	N.D.	42355	40646	N.D.	N.D.	N.D.	39177	N.D.	39136
p	390.274	4.751	N.D.	5388111	5167286	4859410	4394943	859372	4997801	4179235	4558906	2787622	4146106	4758924
p	166.025	4.6638	N.D.	91318	21505	N.D.	77773	80316	25996	N.D.	N.D.	N.D.	N.D.	N.D.
p	148.015	4.80138	851398	1134751	N.D.	858516	744981	1098474	N.D.	1147172	N.D.	N.D.	860582	911534
p	448.327	4.7864	91949	76927	N.D.	N.D.	63441	N.D.	N.D.	124960	N.D.	N.D.	N.D.	71080
p	278.15	4.9015	84582	115475	119875	101641	133508	101588	123614	84926	106318	87433	83034	122522
p	56.062	4.77867	N.D.	61110	71674	N.D.	64805	N.D.	N.D.	N.D.	N.D.	N.D.	N.D.	N.D.
p	2025.47	4.81182	93843	103778	91035	91478	101914	107711	90711	96085	86761	85632	N.D.	100499
p	2547.85	4.84175	44423	42262	40782	40560	40848	41554	39287	42404	39806	144191	38703	38641
p	854.957	4.8388	N.D.	11633	9292	N.D.	N.D.	12937	N.D.	N.D.	12383	39016	N.D.	N.D.
p	855.291	4.8384	11584	11630	N.D.	N.D.	N.D.	9850	11928	N.D.	N.D.	40128	N.D.	N.D.
p	391.362	4.76625	17497	17143	N.D.	19887	N.D.	N.D.	N.D.	N.D.	N.D.	15994	N.D.	N.D.
p	335.316	4.82608	72635	41394	50835	63893	32193	63602	104936	56976	67128	54013	36625	74497
p	2083.51	4.90025	118531	134311	119292	128756	124385	123566	122725	125603	121144	124695	123700	128230
p	2605.89	4.93511	N.D.	21518	21057	N.D.	23138	21909	20495	19686	N.D.	78975	19205	20470
p	56.062	4.96288	N.D.	103271	81031	N.D.	83181	N.D.	85793	80812	N.D.	70362	73578	89241
p	120.022	4.95764	71951	56516	58303	106797	62272	59698	52471	68301	47350	53453	58841	N.D.
p	390.275	4.96567	3886588	4298691	4507269	4686926	4437626	4066728	4145635	4328513	4100293	3764979	4443392	4159745
p	435.331	4.92333	N.D.	26381	27904	N.D.	31849	N.D.	51499	44214	30788	29891	30839	25448
p	448.327	4.95667	N.D.	57679	134151	N.D.	68341	N.D.	61883	N.D.	51925	N.D.	N.D.	63593
p	166.025	4.95418	N.D.	1027799	1063364	935579	914479	727471	958230	1039652	1025132	862445	146046	155636
p	430.232	4.964	17097	16222	N.D.	N.D.	N.D.	N.D.	N.D.	N.D.	N.D.	N.D.	N.D.	N.D.
p	2141.56	4.98683	139679	155417	147531	147708	155701	161533	149542	144042	154568	161029	155362	144535
p	372.32	5.05717	60433	74912	61597	63189	15634	57613	64410	63056	61546	62804	60734	61706
p	738.875	5.06412	13797	18200	14057	13840	17063	15288	N.D.	N.D.	N.D.	N.D.	13316	15383
p	2199.59	5.06958	162647	164149	169601	165478	166106	173879	165519	165155	171055	174975	172821	174911
p	701.2	5.08067	197623	175204	158068	198022	159044	163324	193912	169674	161775	119856	182451	165506
p	704.198	5.08427	34067	27745	25218	33442	24303	24537	22750	27160	26982	N.D.	31143	26313
p	706.156	5.0866	32413	26162	26424	33487	23491	26723	32374	N.D.	25806	N.D.	26448	25728
p	2257.63	5.14875	163705	172021	168168	172691	186062	177973	167227	173127	164374	177888	172588	186792
p	744.491	5.1325	32843	41102	N.D.	N.D.	N.D.	N.D.	N.D.	N.D.	N.D.	N.D.	N.D.	N.D.
p	719.507	5.11875	142432	169158	117158	N.D.	N.D.	N.D.	N.D.	N.D.	10860	N.D.	N.D.	N.D.
p	337.332	5.18258	3545813	3270275	2621688	2996303	1513076	3304406	5810926	3142502	2894517	2819323	2117894	4150943
p	363.347	5.2274	108512	90486	94911	163470	117784	136404	N.D.	116269	121687	81276	N.D.	166164
p	2315.68	5.224	146274	152760	169830	152488	161514	160067	157235	164596	157153	156646	165999	165422
p	777.905	5.22591	20261	19024	N.D.	22739	25162	22992	20969	18659	19173	22376	21684	22149
p	385.329	5.31867	N.D.	30746	N.D.	N.D.	N.D.	N.D.	N.D.	N.D.	N.D.	12754	28120	N.D.
p	481.273	5.26709	N.D.	171774	173020	176727	172242	166604	163161	169153	173964	175852	141493	160102
p	606.03	5.27742	303038	362910	314714	332498	393541	221139	274179	381508	358496	446228	452311	311777
p	644.992	5.265	15474	19449	18010	16237	25429	8901	16982	26007	25108	32416	23428	18701
p	797.253	5.295	20734	22192	19664	N.D.	N.D.	23513	19844	22602	23778	14858	23378	20880
p	2373.72	5.29675	134851	138329	144139	140365	141415	137673	128706	136511	133064	130696	144607	139725
p	796.917	5.29629	N.D.	23713	21559	21018	N.D.	13429	19281	N.D.	N.D.	20935	N.D.	20819
p	797.585	5.30067	17496	18588	16264	N.D.	N.D.	17471	N.D.	18329	N.D.	16734	N.D.	N.D.
p	538.062	5.30987	17795	146884	36159	19129	N.D.	N.D.	24064	50835	N.D.	59419	56386	N.D.
p	816.264	5.3628	18610	15909	19721	21694	N.D.	23557	16441	22629	24008	21261	N.D.	22425
p	816.597	5.3636	N.D.	20717	28221	23590	29627	30458	25159	28433	27607	27152	N.D.	27148
p	2431.76	5.3655	103889	108973	109829	103093	117904	107005	107701	113888	114507	112713	103697	105017
p	363.347	5.36583	47281	48163	56820	N.D.	N.D.	N.D.	N.D.	53308	47373	N.D.	60563	N.D.
p	311.316	5.36673	82050	55786	78773	52703	N.D.	56212	59937	47282	54447	49366	60068	93343
p	701.2	5.403	149073	136999	139935	139113	137777	131939	146826	149425	139165	N.D.	143569	134644
p	2489.8	5.43525	74571	75852	75491	72585	75352	77234	72668	73816	70011	80788	70907	74830
p	706.155	5.40329	20573	17717	N.D.	22498	22426	N.D.	26073	N.D.	24378	N.D.	9060	N.D.
p	281.27	5.44275	N.D.	7093	7357	N.D.	N.D.	7889	14780	N.D.	N.D.	N.D.	N.D.	N.D.
p	320.305	5.44458	41525	48688	37792	31859	22599	36312	59527	48422	38102	33174	22543	59955
p	835.609	5.43663	18927	25375	18920	N.D.	N.D.	20188	17678	20820	N.D.	20088	17456	N.D.
p	680.672	5.44609	15057	13419	9328	11108	N.D.	15173	25685	15115	11031	11756	7471	21289
p	343.34	5.44592	62595	55954	40589	49662	18159	52739	94254	49040	40976	46883	30901	71471
p	337.332	5.44725	4692438	4447713	3625444	4192950	2009666	4425017	7921031	4356303	3806574	3829299	2753001	5798943
p	612.5	5.48833	35747	30863	29999	N.D.	N.D.	N.D.	N.D.	N.D.	N.D.	N.D.	N.D.	N.D.
p	2547.85	5.49917	47194	42692	40647	38693	47310	43162	41880	44773	45990	47658	45477	47375
p	435.3	5.45522	19277	16403	13183	N.D.	N.D.	20854	25314	16635	16535	N.D.	13092	21178
p	723.521	5.504	133106	116083	119221	N.D.	N.D.	N.D.	N.D.	N.D.	N.D.	N.D.	N.D.	N.D.
p	822.285	5.51058	58561	68384	57467	63173	68889	65137	60370	69873	68729	53821	66045	62333
p	854.958	5.50487	9944	14057	N.D.	12728	13707	N.D.	N.D.	N.D.	13434	12024	12365	13726
p	440.287	5.555	207026	323290	302478	158227	185500	123267	N.D.	N.D.	N.D.	N.D.	159183	326567
p	735.521	5.553	456143	340010	367521	N.D.	N.D.	N.D.	N.D.	N.D.	N.D.	N.D.	N.D.	N.D.
p	2605.89	5.56244	21492	23019	21878	21256	N.D.	24093	22167	N.D.	23545	23747	N.D.	24879
p	418.305	5.5995	N.D.	404409	N.D.	408231	368080	515756	712448	369981	324107	N.D.	N.D.	416905
p	933.625	5.67173	N.D.	26102	33342	36059	33829	37163	37632	22026	32591	38852	32252	28816
p	938.579	5.67827	43630	31192	24246	41485	39887	41090	43838	30501	32695	N.D.	31345	29568
p	974.65	5.6828	16391	11987	N.D.	14794	12560	16348	14894	16256	N.D.	18825	19218	14537
p	954.554	5.67692	87793	63019	63278	89317	90571	89992	85846	71072	68035	81250	69866	79568
p	611.149	5.70382	25738	19237	24100	23766	21941	24296	25558	25015	26816	44034	N.D.	28430
p	740.179	5.8052	N.D.	19923	21099	N.D.	N.D.	N.D.	7186	N.D.	6187	27849	N.D.	N.D.
p	775.218	5.772	260192	225602	207564	243335	202687	214823	233867	206394	216882	710295	225334	211094
p	778.217	5.77408	44666	47151	39875	47600	43573	37662	45051	41209	43319	137928	42393	39801
p	817.245	5.803	N.D.	13847	13163	17897	N.D.	14688	16651	11497	13980	38593	14288	16152
p	502.096	5.775	18196	14574	N.D.	18930	N.D.	16080	16011	15092	15341	44722	N.D.	N.D.
p	780.173	5.77533	29371	26106	25491	27550	25781	24765	26475	24669	25605	73420	24609	23869
p	703.51	5.85033	43721	27538	34148	N.D.	N.D.	N.D.	N.D.	N.D.	N.D.	N.D.	N.D.	N.D.
p	737.536	5.85933	123000	91893	95643	N.D.	N.D.	N.D.	N.D.	N.D.	N.D.	N.D.	N.D.	N.D.
p	365.363	5.8907	93221	130076	93272	93434	83827	98460	37850	N.D.	109113	N.D.	117730	101061
p	611.15	5.95175	20462	31027	N.D.	30144	N.D.	N.D.	25816	N.D.	N.D.	N.D.	N.D.	N.D.
p	796.145	5.85891	20240	14173	14065	20222	15433	13628	17184	15333	17823	N.D.	15262	13148
p	775.218	6.00133	217925	237655	220455	272623	248183	251451	235599	217386	241578	257087	227385	254180
p	778.218	6.00092	39804	52701	38630	55991	47207	43734	46545	41878	42838	36477	44450	44956
p	780.173	6.00225	27580	33839	31261	30747	30939	33069	27604	27771	31196	24926	28555	31126
p	1403.4	6.015	24199	22707	N.D.	26666	N.D.	30192	N.D.	N.D.	28227	29984	21945	26153
p	749.549	6.02427	N.D.	156358	156137	136160	135921	122683	123873	142709	138897	66701	125496	115774
p	707.527	6.054	76271	69440	63260	N.D.	N.D.	N.D.	N.D.	N.D.	N.D.	N.D.	N.D.	N.D.
p	821.466	6.09967	21657	26006	25366	27197	25348	23465	25987	22824	25612	24399	23342	24731
p	888.7	6.12433	5153	4915	6013	4506	N.D.	N.D.	N.D.	5791	N.D.	5176	N.D.	N.D.
p	648.647	6.15408	84794	86341	84051	86875	84505	84605	87380	87249	89597	84196	87599	88375
p	535.471	6.1708	N.D.	15997	N.D.	13104	11440	N.D.	6294	N.D.	12280	N.D.	N.D.	N.D.
p	339.347	6.1843	21370	22954	18266	23214	N.D.	29398	N.D.	32053	19738	17857	13639	20688
p	596.506	6.20367	229597	149661	188415	N.D.	N.D.	N.D.	N.D.	N.D.	N.D.	N.D.	N.D.	N.D.
p	365.363	6.20167	45974	55766	44944	49272	28136	52875	101185	67609	40057	46863	29648	76104
p	530.396	6.2248	146160	142405	N.D.	N.D.	181791	195582	146214	N.D.	N.D.	N.D.	N.D.	N.D.
p	755.738	6.223	16555	23223	21360	N.D.	N.D.	N.D.	21755	23625	30020	21576	19663	23262
p	771.712	6.2377	4913	6820	6007	N.D.	5163	7387	6363	N.D.	9151	7191	5619	5575
p	835.665	6.3824	56022	21979	51092	N.D.	27860	N.D.	45732	43854	46623	32707	14516	53355
p	826.772	6.25188	18705	39449	36853	N.D.	N.D.	N.D.	N.D.	27416	51583	40659	34809	37400
p	732.749	6.24925	N.D.	30511	N.D.	16380	25116	22856	N.D.	N.D.	N.D.	N.D.	N.D.	N.D.
p	546.482	6.2782	65369	67216	N.D.	62377	51323	63832	40107	63362	N.D.	74885	62188	65630
p	468.318	6.27143	N.D.	123366	N.D.	72001	N.D.	N.D.	102674	60278	84753	N.D.	50109	48438
p	488.431	6.28175	134010	164189	137437	181360	173569	178312	145171	134749	199948	137265	133514	171768
p	733.756	6.26742	255962	119841	189232	116296	132874	115192	162607	182046	147963	184057	176472	134217
p	622.521	6.288	6362	4270	N.D.	N.D.	N.D.	N.D.	N.D.	N.D.	N.D.	N.D.	N.D.	N.D.
p	363.347	6.28408	29699	26210	33038	29361	25636	28485	32926	32112	31819	35119	33578	31902
p	848.779	6.288	11549	4699	9073	N.D.	N.D.	N.D.	6710	N.D.	N.D.	9279	6991	N.D.
p	804.792	6.29317	256928	119713	204626	124163	135064	132354	166542	199529	160708	187882	192955	140314
p	424.352	6.30936	201010	519518	171759	446723	181088	73974	N.D.	469187	440963	490160	471976	189390
p	811.602	6.3226	31472	15497	28292	N.D.	4769	N.D.	22722	27464	18170	22446	27061	21012
p	1105.77	6.32712	11262	4425	9535	N.D.	N.D.	N.D.	7757	9968	N.D.	9247	10892	6783
p	791.506	6.32725	164806	128613	158085	53513	54311	51592	152008	169995	126469	152079	160570	143603
p	775.532	6.32892	257309	210212	251526	227539	219644	216045	242587	268262	255602	255255	250116	261871
p	576.508	6.33042	825216	855677	832667	1137289	1150561	1106837	875243	879586	897464	844115	838297	903238
p	607.699	6.299	294147	182675	271592	62367	18994	N.D.	239446	253505	196298	N.D.	264707	N.D.
p	717.727	6.34033	41414	27182	40836	17591	20714	14819	32776	40050	33265	39150	34755	30077
p	1627.37	6.356	N.D.	367312	N.D.	134279	113025	122693	N.D.	N.D.	355320	545648	N.D.	417711
p	849.236	6.34882	443876	363753	380171	N.D.	234465	258175	404995	374883	385960	1729462	386187	361785
p	791.701	6.3415	3281498	2310969	3133437	630264	524842	567849	2609219	3398821	2365438	2851935	3514383	2533998
p	852.235	6.35158	104612	83909	89470	65103	49662	59936	81443	122809	90102	402109	119333	82745
p	588.449	6.3566	N.D.	240401	203761	189758	192267	189196	158557	195098	253727	249637	N.D.	201620
p	789.69	6.35608	161289	91429	129111	34677	31151	37005	131978	156174	125669	142520	127105	130106
p	790.694	6.34942	880473	611340	721882	176920	154435	147773	750374	763800	647779	738574	830523	698862
p	530.396	6.35391	N.D.	347448	333171	425477	297222	288643	253781	388668	502552	459229	234317	220955
p	631.513	6.36425	8801	13071	10211	N.D.	N.D.	10333	N.D.	10684	16698	24741	11290	N.D.
p	617.5	6.36413	19764	18737	N.D.	N.D.	27171	27435	19909	21802	N.D.	31265	N.D.	20080
p	568.442	6.4875	62438	57628	N.D.	N.D.	N.D.	N.D.	N.D.	N.D.	N.D.	N.D.	N.D.	N.D.
p	891.262	6.44933	N.D.	65535	N.D.	N.D.	15845	72341	N.D.	13016	N.D.	N.D.	60118	52281
p	685.169	6.48664	154458	240606	129670	122973	230637	252925	102707	279799	151817	509312	275172	N.D.
p	870.163	6.44582	13937	22399	6210	21758	28105	N.D.	10628	19222	14770	44098	10035	16124
p	852.236	6.5265	123823	109342	N.D.	107394	N.D.	117166	N.D.	N.D.	129622	N.D.	N.D.	120417
p	849.237	6.5225	526392	479157	N.D.	406447	N.D.	N.D.	331091	507733	549677	N.D.	466399	496991
p	444.414	6.5225	30488	33542	24387	31383	34393	22184	27451	37918	19521	56542	25958	20262
p	875.684	6.64856	13436	13904	N.D.	16457	14093	14366	12649	13753	14297	N.D.	12348	N.D.
p	739.763	6.6723	10330	7939	9049	9649	10393	9519	N.D.	9022	9503	10274	N.D.	8131
p	771.712	6.67242	646898	22458	622655	626600	26231	25302	23097	22414	675909	644502	23716	567185
p	733.757	6.672	12400000	10600000	11500000	10400000	14000000	11700000	11000000	11700000	12200000	12900000	10800000	10100000
p	502.455	6.67417	165550	140831	113908	116950	83126	107281	134384	99862	86225	569064	126826	122321
p	831.721	6.66675	5970	13752	16895	13345	9520	18051	N.D.	12949	7570	N.D.	N.D.	N.D.
p	1505.45	6.67122	83771	72936	78656	80184	92010	82861	75217	N.D.	N.D.	84015	72321	N.D.
p	732.751	6.67408	2305611	1871062	2193507	1962147	2538030	2125826	1963544	2121552	2323131	2441370	1949871	1892675
p	730.737	6.6825	N.D.	19540	22551	N.D.	26005	N.D.	N.D.	N.D.	N.D.	N.D.	N.D.	20106
p	731.743	6.67725	N.D.	188256	212591	N.D.	256724	N.D.	N.D.	N.D.	N.D.	N.D.	N.D.	192978
p	183.065	6.67492	61846	47937	60317	53796	62220	59581	52228	53361	60520	66432	52749	52568
p	715.652	6.7328	10370	7441	7743	N.D.	12594	10273	10933	N.D.	10188	15332	10333	12718
p	1230.73	6.77233	8611	9079	N.D.	12787	7569	11767	N.D.	9301	N.D.	13507	10910	8828
p	568.442	6.76633	39186	28830	32379	N.D.	N.D.	N.D.	N.D.	N.D.	N.D.	N.D.	N.D.	N.D.
p	1250.82	6.779	14895	9291	8789	N.D.	11243	9455	13868	10872	10873	13087	13043	10102
p	1214.75	6.78463	7594	10625	N.D.	8986	6648	7625	N.D.	N.D.	7680	9683	7915	N.D.
p	666.654	6.78729	7798	7059	7481	N.D.	N.D.	6187	10727	N.D.	6930	8458	N.D.	N.D.
p	704.67	6.81245	279540	174940	179833	157275	440511	313850	476453	460003	N.D.	295729	286060	179655
p	607.7	6.80187	717930	689170	681164	609993	N.D.	N.D.	N.D.	740364	624546	674843	N.D.	715019
p	703.663	6.813	N.D.	51742	51023	N.D.	71101	N.D.	112931	108468	N.D.	N.D.	58663	N.D.
p	560.496	6.80658	175169	188051	320614	341494	261001	327770	396620	349445	227495	1604015	383670	300555
p	923.253	6.8752	171861	217966	709479	N.D.	N.D.	923438	230844	150267	952802	1417803	749749	147616
p	726.651	6.835	N.D.	239847	117121	92958	N.D.	N.D.	N.D.	N.D.	218014	N.D.	N.D.	222014
p	725.646	6.84625	45351	72022	N.D.	N.D.	N.D.	N.D.	N.D.	N.D.	68916	N.D.	N.D.	74582
p	611.544	6.8682	N.D.	18224	N.D.	12907	12949	13507	N.D.	N.D.	N.D.	N.D.	12609	N.D.
p	502.455	6.90367	185760	133804	142561	110516	135596	127932	162443	162037	112990	166801	168836	136306
p	618.538	6.91225	754426	652219	64159	673527	596800	553159	735879	587489	545591	3850204	66830	626759
p	460.351	6.93067	44260	58073	33217	N.D.	N.D.	N.D.	160461	N.D.	N.D.	102672	84417	N.D.
p	929.216	6.9302	N.D.	69437	N.D.	47359	N.D.	73916	N.D.	N.D.	72127	N.D.	N.D.	62480
p	964.279	6.927	N.D.	162135	N.D.	129560	117427	N.D.	129494	161800	N.D.	187392	122102	N.D.
p	926.251	6.91937	N.D.	169394	N.D.	N.D.	201045	224612	125533	235358	N.D.	368277	180377	234230
p	577.518	7.003	333768	263460	N.D.	N.D.	N.D.	N.D.	N.D.	N.D.	N.D.	N.D.	N.D.	N.D.
p	676.58	7.01046	88018	1295996	1152980	1291360	135027	1124826	178175	151952	154906	898973	N.D.	1218030
p	677.464	7.00575	167124	177787	193403	189504	180760	214077	189846	247067	182755	111731	265721	213254
p	560.497	7.01067	217379	164877	182894	512637	418356	402762	455287	393376	370169	489225	481733	441387
p	661.491	7.0298	N.D.	620566	658600	N.D.	N.D.	686686	N.D.	764281	589865	N.D.	N.D.	N.D.
p	781.44	7.0431	N.D.	8875	9409	8456	6699	8597	7982	9080	8708	N.D.	13604	7526
p	719.448	7.0375	17990	18445	21238	18828	16192	19225	17785	N.D.	18478	N.D.	21817	18004
p	621.498	7.05488	12229	13538	15047	10397	N.D.	14943	10856	15458	N.D.	N.D.	16296	N.D.
p	639.51	7.0485	4008158	3216622	4199715	4167585	3594177	3958751	4030076	4362959	3439899	2627930	5546077	3979476
p	759.187	7.06075	412905	439323	432693	442072	429643	421877	413407	445047	420752	679146	445083	439490
p	762.183	7.05992	96193	88564	86320	79062	89240	81188	84390	87843	86136	136943	77216	90130
p	764.145	7.097	N.D.	18753	N.D.	N.D.	14655	21257	N.D.	N.D.	N.D.	N.D.	17799	N.D.
p	555.517	7.067	331302	196404	300803	N.D.	N.D.	N.D.	N.D.	N.D.	N.D.	N.D.	N.D.	N.D.
p	751.648	7.0923	1751617	1517844	1368782	1577900	1462070	1414204	N.D.	1428448	N.D.	9762195	1513715	1441565
p	734.621	7.10164	186816	153095	158921	137133	192278	115291	149452	32145	155435	869800	146141	N.D.
p	618.537	7.093	954210	796554	N.D.	838460	37512	65809	N.D.	N.D.	706362	N.D.	N.D.	N.D.
p	589.677	7.1122	1437471	1349333	1504653	1462780	1417761	1348049	N.D.	1285239	1439284	1415907	N.D.	1264279
p	814.644	7.16529	103801	97805	N.D.	N.D.	80895	84770	N.D.	77956	N.D.	541930	N.D.	96195
p	809.689	7.16508	1807120	1543760	1418434	1583031	1488577	1471026	1618582	1454841	1482020	10700000	1512641	1459866
p	927.253	7.006	107092	22093	N.D.	N.D.	N.D.	N.D.	N.D.	N.D.	109471	N.D.	N.D.	N.D.
p	676.578	7.18367	1760130	1661127	1486807	196800	1585782	189162	1762316	1626050	N.D.	N.D.	N.D.	1582561
p	605.651	7.20233	N.D.	529952	N.D.	N.D.	N.D.	N.D.	N.D.	N.D.	N.D.	512609	N.D.	578266
p	625.748	7.206	516694	805445	823346	767680	791630	765544	411792	805262	792457	660173	786456	809947
p	282.275	7.2276	63009	95771	N.D.	94351	93538	N.D.	90469	22086	15836	90551	92550	89484
p	281.269	7.2324	68698	106556	72721	N.D.	N.D.	111262	106524	N.D.	N.D.	N.D.	N.D.	N.D.
p	788.672	7.26329	N.D.	7222	13012	N.D.	17696	N.D.	18937	N.D.	7844	15990	8884	N.D.
p	549.686	7.2335	4791038	7460197	7174650	7171197	5145180	7075901	5024858	6205030	5032858	5330092	7263603	7144675
p	531.673	7.23258	62010	96584	73139	68158	57301	74063	93230	97677	72734	95786	97520	99300
p	606.694	7.2395	N.D.	535485	N.D.	N.D.	577943	516871	N.D.	N.D.	518041	452224	N.D.	522096
p	747.714	7.24275	5046588	5175812	5496030	5012396	5718724	4974946	5132008	5210418	5243262	4841867	4957323	5198048
p	848.832	7.24463	8319	8981	N.D.	N.D.	9696	8521	8275	N.D.	8963	N.D.	8188	10404
p	746.707	7.24717	1180664	1214611	1256186	1175763	1334370	1169455	1204066	1209609	1216422	1157686	1142572	1205769
p	569.534	7.25133	33640	26171	38904	N.D.	N.D.	N.D.	N.D.	N.D.	N.D.	N.D.	N.D.	N.D.
p	745.7	7.24975	194084	203966	218273	198830	236081	196802	178093	180740	179822	171845	173808	197037
p	567.696	7.24017	2502616	2281689	2505692	884933	577694	2799675	2253991	2862923	2488004	2187101	4212427	2177878
p	566.69	7.235	N.D.	992825	1169626	429991	438723	906253	1034269	1792935	1126112	926050	1763965	418718
p	734.62	7.26733	207793	185234	N.D.	N.D.	N.D.	171184	222068	N.D.	N.D.	N.D.	234982	40846
p	792.68	7.26767	39011	41526	N.D.	N.D.	19789	N.D.	N.D.	47389	N.D.	N.D.	24189	31384
p	1193.8	7.28417	105209	79013	77896	90496	94707	100188	115544	81755	86181	98708	94525	78270
p	1234.83	7.286	57608	42907	44473	50188	52600	51401	61089	44601	45638	45400	50112	43575
p	1198.76	7.28475	90728	66229	67896	80807	82671	87277	96124	73280	76982	84357	79665	66491
p	925.771	7.30125	756293	739170	N.D.	N.D.	N.D.	N.D.	N.D.	N.D.	740596	5850263	N.D.	N.D.
p	765.811	7.29733	27501	21385	28628	23100	30227	27413	21331	24466	28166	27564	21850	21342
p	1003.24	7.297	69349	58090	68039	N.D.	59127	74322	56716	65673	69252	113673	62694	66793
p	634.631	7.30533	23359	23606	26456	24240	23196	22432	22569	23133	25285	23781	22814	21098
p	1006.23	7.3	10306	9975	10545	N.D.	9358	11552	10124	9907	12984	22393	12508	11742
p	946.202	7.308	22420	19276	N.D.	N.D.	N.D.	22226	N.D.	20132	26990	N.D.	N.D.	23625
p	997.271	7.30625	883784	850646	788561	867189	838007	976645	799727	837047	994232	1701406	865618	835783
p	1000.27	7.305	307840	277724	278592	297053	278105	312072	270136	265619	331280	515462	271121	262588
p	1018.2	7.3106	44770	37923	38831	40748	37640	N.D.	38437	29954	35374	50434	42288	N.D.
p	963.236	7.31333	N.D.	36100	N.D.	36746	N.D.	38823	N.D.	N.D.	N.D.	N.D.	N.D.	N.D.
p	1214.73	7.31375	59948	44787	43264	55203	51250	58442	64891	45684	49765	54589	53935	43476
p	535.154	7.30933	82021	75518	70900	82547	69899	80547	81729	67570	74359	115893	80999	80946
p	743.539	7.36933	105211	98414	120581	167614	170528	167789	N.D.	N.D.	N.D.	N.D.	N.D.	N.D.
p	1038.3	7.33925	124490	128007	N.D.	N.D.	126190	132259	N.D.	115703	193331	261155	128275	N.D.
p	983.814	7.40745	406664	321415	960336	1092001	1065279	1062435	N.D.	305219	310620	2932641	275505	1107030
p	1041.3	7.34683	54635	54010	N.D.	N.D.	50931	57397	N.D.	45295	N.D.	N.D.	54721	N.D.
p	888.657	7.34967	N.D.	62318	65128	N.D.	N.D.	N.D.	66378	N.D.	N.D.	N.D.	N.D.	N.D.
p	1041.85	7.48158	516831	121557	536057	522446	531045	535705	529678	548282	122177	1165729	529377	528970
p	730.591	7.39056	9193	12083	12744	33106	N.D.	43996	49889	141284	N.D.	16845	N.D.	10913
p	930.726	7.41186	108075	128847	136744	N.D.	139966	N.D.	135357	134421	N.D.	N.D.	137151	N.D.
p	946.698	7.4105	44112	39847	N.D.	N.D.	42172	43350	N.D.	42287	N.D.	N.D.	44396	N.D.
p	817.261	7.39833	N.D.	13494	11325	N.D.	12067	11316	N.D.	N.D.	N.D.	20585	12117	N.D.
p	771.572	7.43267	177775	144233	193660	N.D.	N.D.	N.D.	N.D.	N.D.	N.D.	N.D.	N.D.	N.D.
p	925.773	7.4072	1517450	1676127	2386585	2427840	2442329	2449580	2230713	2241603	N.D.	N.D.	2523175	2445574
p	988.765	7.45658	60976	73129	63689	71561	67912	70999	72180	71950	69453	142882	59879	70673
p	539.521	7.481	75859	53636	42945	N.D.	N.D.	N.D.	N.D.	N.D.	N.D.	N.D.	N.D.	N.D.
p	779.619	7.4726	N.D.	23473	N.D.	N.D.	18760	N.D.	N.D.	N.D.	N.D.	44074	24441	23872
p	639.573	7.47709	88969	106038	90329	76102	90176	70403	64704	80610	74113	126539	74221	N.D.
p	836.204	7.50108	97660	98204	95464	99592	97990	97886	96795	95478	96769	156239	96616	96077
p	833.204	7.50025	415826	394201	398656	433145	409380	396773	420555	415601	404490	675956	404376	417747
p	864.635	7.513	11690	6998	7621	7192	6034	7669	N.D.	6508	6706	7937	N.D.	7998
p	1046.81	7.50075	25576	20527	27861	28862	27682	28241	26388	28356	26552	56751	27455	27451
p	665.588	7.5245	N.D.	39381	N.D.	37823	41056	34008	27328	N.D.	N.D.	47977	24111	30009
p	1099.89	7.55217	148229	169204	158866	179319	181934	181034	155606	180406	174479	381477	176012	202496
p	959.754	7.46125	N.D.	26371	N.D.	N.D.	N.D.	N.D.	N.D.	N.D.	N.D.	10802	9465	6548
p	759.571	7.58782	89598	57234	87197	176986	146763	174684	60524	301241	43408	167276	N.D.	69149
p	1157.94	7.59217	50589	47115	47771	45796	44152	47218	47912	47207	45119	103390	46627	48919
p	785.585	7.65425	206248	166213	193680	53428	89053	79937	N.D.	42670	N.D.	132362	N.D.	N.D.
p	572.455	7.648	16013	13961	20149	N.D.	N.D.	N.D.	N.D.	N.D.	N.D.	N.D.	N.D.	15761
p	346.215	7.65787	97304	91773	97620	76605	N.D.	74143	97710	100835	N.D.	N.D.	N.D.	75772
p	514.402	7.65742	2663755	2729782	2680058	2724603	2655294	2598996	2719241	2714320	2757763	2640566	2690846	2722793
p	502.096	7.663	N.D.	62475	N.D.	57285	58849	N.D.	N.D.	N.D.	N.D.	N.D.	N.D.	N.D.
p	1080.24	7.6668	8241	7384	6397	6954	6765	9164	7727	7401	10235	N.D.	6589	N.D.
p	1074.29	7.66518	267909	238990	238836	246763	245839	280535	237980	233535	278857	433537	230461	N.D.
p	1071.29	7.66508	699202	619569	639676	661237	621522	738017	615758	650451	767786	1138310	640587	886096
p	1036.25	7.66763	58998	37231	39513	47207	N.D.	N.D.	49813	N.D.	46401	96177	N.D.	52414
p	1113.32	7.666	106137	98501	N.D.	102452	99235	N.D.	N.D.	N.D.	106097	150616	N.D.	93995
p	472.387	7.67117	31404	39661	31927	30397	41870	29781	60255	46747	26785	50754	48669	26655
p	1039.26	7.67367	N.D.	12865	12693	N.D.	N.D.	N.D.	N.D.	N.D.	14278	N.D.	N.D.	N.D.
p	1077.27	7.6689	44629	49318	45314	44806	39472	51645	48046	40257	48563	N.D.	44948	N.D.
p	1116.31	7.66729	26609	23995	N.D.	24663	22869	N.D.	N.D.	N.D.	26748	38976	N.D.	25152
p	581.74	7.71	5793	5690	N.D.	N.D.	N.D.	6439	6100	6946	N.D.	N.D.	N.D.	N.D.
p	779.767	7.71575	25695	11728	24333	23681	14697	24058	15512	23763	24494	24842	21932	13369
p	527.491	7.72425	61895	63161	61933	65642	64331	61641	63265	66762	65860	63214	62348	63869
p	568.485	7.7275	27894	21882	N.D.	N.D.	N.D.	N.D.	N.D.	N.D.	N.D.	N.D.	N.D.	N.D.
p	583.458	7.729	34691	33500	37427	34713	35851	34825	N.D.	39105	50405	42745	N.D.	36536
p	891.28	7.79087	15670	13891	13350	13300	N.D.	N.D.	14789	N.D.	14383	24497	16120	N.D.
p	612.168	7.8345	19304	19531	20098	N.D.	24170	19095	N.D.	17343	25857	38058	21986	23466
p	609.171	7.83317	163699	154637	159742	156572	153675	158026	168987	161793	180359	253325	162158	166627
p	662.442	7.86542	6284660	6135299	6246717	5797946	5920139	5984742	5878536	6080117	6099092	7187439	6455132	6728265
p	720.494	7.86483	2126823	2067599	2128188	1998794	2106860	2006997	2010256	2048745	2054399	2473464	2193925	2323699
p	749.545	7.86808	2846874	2667350	2686562	2657516	2659317	2553199	2669005	2609883	2584091	3318241	2850127	2859830
p	606.378	7.86642	103404	100896	109588	98390	126954	78225	92694	91322	99489	114538	102002	128422
p	735.528	7.87008	445058	399388	400415	400283	401245	394012	399169	350330	386313	520052	422812	433862
p	763.563	7.869	8445288	8020685	7998180	7804974	7824334	7651327	8004895	7836806	7841992	9651167	8053288	8543414
p	758.506	7.8721	28874	29711	29458	29197	28547	29443	28604	29356	30932	38831	N.D.	N.D.
p	791.589	7.86858	77519	74229	74009	91098	71872	72071	82844	69559	85241	85936	69481	74141
p	707.494	7.868	32904	30119	33487	33120	N.D.	24604	31797	34613	25405	36781	27870	N.D.
p	907.223	7.87925	422033	421076	418957	410375	434575	438735	402324	418478	441127	635920	380744	407519
p	910.221	7.879	116898	115644	117788	114847	114158	117335	120583	118635	121632	193684	113596	106175
p	541.506	7.94592	24830	27385	26772	25320	26418	27572	27586	28112	25084	26845	25444	25488
p	1097.24	7.95833	7310	6886	5652	N.D.	N.D.	N.D.	N.D.	N.D.	N.D.	N.D.	N.D.	N.D.
p	1166.23	7.95308	42967	36639	23572	39390	34651	44306	38563	27385	48585	65934	36373	34074
p	1152.27	7.96067	N.D.	29242	32868	N.D.	27293	36297	N.D.	30051	N.D.	N.D.	25358	N.D.
p	1110.27	7.9573	64519	56706	N.D.	41009	53208	48730	54697	56358	47041	92844	60536	N.D.
p	1145.31	7.95675	587516	521471	491248	814680	504146	613737	802384	518304	870877	917604	530626	787187
p	546.371	7.9565	53470	65594	64972	56910	56991	58295	57896	58455	59923	58227	62342	55481
p	1148.31	7.95662	260263	241655	237218	N.D.	233005	284371	N.D.	238953	N.D.	359628	246437	N.D.
p	1094.24	7.95727	25876	24083	20751	24996	28726	28019	31633	28654	32472	N.D.	28052	69581
p	600.506	7.99414	N.D.	27987	26678	N.D.	N.D.	N.D.	27484	33285	25762	N.D.	38542	29605
p	665.674	8.01983	N.D.	18945	N.D.	9751	N.D.	12937	N.D.	9639	N.D.	10976	10827	N.D.
p	564.553	8.04333	N.D.	64244	N.D.	N.D.	N.D.	27737	29138	33431	15364	26408	N.D.	N.D.
p	667.605	8.08433	69677	106500	74900	73854	79255	76509	62117	71251	65466	132595	68997	73076
p	550.537	8.10242	52775	51347	52608	61250	54559	50291	57516	56258	47689	72643	57720	54495
p	965.298	8.1265	20273	23204	19372	N.D.	21195	N.D.	22353	19623	21147	31036	20994	21854
p	492.486	8.12425	307574	349710	340521	348290	342614	328927	350516	337703	353756	546246	351861	342380
p	647.69	8.13425	N.D.	4963	N.D.	4066	5488	N.D.	5127	N.D.	N.D.	N.D.	N.D.	N.D.
p	692.549	8.14522	16190	13414	15746	7965	8727	7166	11932	N.D.	11062	19201	N.D.	N.D.
p	715.463	8.1574	20937	15612	N.D.	19573	N.D.	17594	29938	17070	28764	18747	20295	18610
p	611.489	8.15433	913313	915030	920754	891263	866947	870283	935343	937902	937034	865767	891303	895401
p	317.295	8.15467	212451	221698	222203	210881	221743	219056	221912	222241	232322	227851	211151	220645
p	595.517	8.15317	7582903	7594422	7612258	7375048	7281363	7147550	7593295	7646095	7697801	7214866	7291389	7501543
p	555.524	8.15425	8183952	8416439	8295794	7901691	8186516	8084462	8234010	8456744	8521863	8537148	8193481	8356801
p	677.517	8.15392	25895	28067	30855	28117	31936	29547	27682	30646	31588	27031	27028	29546
p	590.484	8.15775	150517	138164	139983	180889	192054	167193	125628	121562	103502	162543	148465	125239
p	550.491	8.16242	115100	116364	124081	142138	166144	137919	98094	97350	94871	148433	127738	102451
p	653.472	8.16142	63794	71409	69937	60668	61590	61423	76276	61982	64529	64346	68334	60500
p	669.446	8.16145	15514	19171	N.D.	14835	N.D.	N.D.	13927	14171	14877	12275	13649	15475
p	680.491	8.16691	27596	29851	28678	N.D.	30759	29170	30370	30563	31457	31139	29051	30192
p	579.543	8.16517	50008	68742	74285	27911	28971	29802	30433	70156	70458	31446	29791	29597
p	987.218	8.18214	17935	12004	N.D.	N.D.	19352	13910	18182	N.D.	21263	32997	N.D.	N.D.
p	984.24	8.18992	128327	122953	131113	138343	127187	143186	120541	136478	141362	208538	147021	138740
p	981.241	8.18933	401125	389780	401457	406615	403156	427437	395083	395457	434259	665145	377418	414860
p	1240.25	8.19308	28670	27506	25789	26599	26756	31236	26197	25872	31130	51079	24429	27155
p	1169.25	8.03933	N.D.	17925	12361	N.D.	N.D.	N.D.	N.D.	11441	N.D.	N.D.	N.D.	N.D.
p	1219.33	8.19792	437102	378708	375814	630179	602142	719278	595208	617780	701625	680107	605461	368465
p	1222.32	8.1986	234854	184991	202028	N.D.	N.D.	N.D.	N.D.	N.D.	N.D.	329014	N.D.	194930
p	1184.29	8.20012	58003	45237	N.D.	56982	35750	59359	N.D.	37383	N.D.	90742	N.D.	37885
p	1022.26	8.2106	37615	27483	N.D.	28782	N.D.	N.D.	N.D.	26987	33271	N.D.	N.D.	N.D.
p	683.189	8.21858	302610	297427	291075	289348	289568	301078	295326	294262	341749	485478	286632	293431
p	686.187	8.21927	51203	54017	51991	44500	49067	N.D.	46230	42947	55324	75582	42194	46305
p	743.155	8.22	15640	17058	N.D.	N.D.	N.D.	N.D.	14871	N.D.	N.D.	28123	N.D.	15201
p	576.505	8.2236	39963	33021	36989	80445	75051	63477	37920	N.D.	N.D.	70533	45053	47211
p	623.224	8.291	N.D.	7164	6293	N.D.	N.D.	N.D.	N.D.	6981	7629	12846	7969	7802
p	831.589	8.29725	18061	19411	N.D.	N.D.	N.D.	N.D.	18295	23643	N.D.	N.D.	N.D.	N.D.
p	642.515	8.29083	75794	74140	73090	80546	87526	89299	74070	77145	66175	121582	87272	82592
p	602.522	8.29475	54691	67504	46457	66388	47181	59915	68493	54429	52882	88795	64972	65426
p	730.471	8.29725	9632	15976	15839	15572	11864	17292	15465	18414	14324	14719	9901	12763
p	702.5	8.31133	24327	25777	22622	26689	23770	25997	27848	26810	29351	27494	22974	26558
p	506.5	8.31967	N.D.	10301	N.D.	9995	11419	N.D.	N.D.	N.D.	9929	23336	N.D.	10676
p	609.529	8.3486	14800	12753	13297	15108	N.D.	N.D.	N.D.	14330	N.D.	N.D.	N.D.	N.D.
p	569.537	8.35292	11602	11037	11328	10364	10596	10860	10684	11425	9924	11156	11203	11143
p	547.492	8.37908	49922	51905	46150	38424	44286	40940	45140	43432	46966	74179	45415	51015
p	418.341	8.38017	59261	49052	60006	55281	48801	49011	43687	55257	45478	68711	46324	63957
p	106.041	8.37729	N.D.	22906	23007	21126	21388	N.D.	N.D.	N.D.	N.D.	36060	21350	25883
p	474.403	8.381	35845	38519	34021	34037	32091	30966	35459	29735	38331	56197	34791	39159
p	1040.32	8.3984	N.D.	11472	N.D.	12761	N.D.	N.D.	14177	14105	N.D.	21320	N.D.	N.D.
p	521.585	8.4015	54993	70961	46900	38830	43886	48004	40469	44435	30322	57570	35761	29455
p	693.705	8.4222	N.D.	12252	N.D.	5946	N.D.	N.D.	N.D.	5127	N.D.	8201	7543	N.D.
p	1242.27	8.42517	12516	13777	11552	10731	10456	11057	22014	12247	16019	25260	10576	13269
p	1258.3	8.4295	37544	31052	29939	29419	30458	22532	N.D.	29841	N.D.	50507	33136	28407
p	1293.34	8.42808	340290	290871	296500	303577	290177	335289	296462	295313	189430	496685	296480	289233
p	592.585	8.44025	N.D.	21141	N.D.	N.D.	11273	N.D.	N.D.	11009	11206	N.D.	N.D.	N.D.
p	504.522	8.41867	6966	8650	N.D.	9388	N.D.	N.D.	N.D.	N.D.	8518	14197	N.D.	7967
p	1334.37	8.43308	46775	38790	21386	40559	37698	40104	40032	38038	42561	61488	40649	36040
p	1314.27	8.4272	18258	16864	17027	N.D.	16701	17039	10301	15520	20548	N.D.	15568	14064
p	678.418	8.46808	43861	50546	48648	46242	49516	42297	47910	49542	52668	59432	50110	54251
p	1055.26	8.47442	413496	284792	284161	296051	288401	320778	294950	288748	320254	456011	295305	272366
p	1058.26	8.47609	N.D.	115889	118011	106285	115024	122402	108025	107887	125635	171419	119288	115592
p	613.558	8.51686	14744	21010	16222	N.D.	17295	N.D.	11395	N.D.	11635	N.D.	N.D.	12167
p	1096.28	8.50025	N.D.	30390	29753	N.D.	19601	N.D.	N.D.	N.D.	N.D.	30748	N.D.	N.D.
p	578.567	8.52317	44991	50063	58356	63135	58002	57558	60445	56454	54581	84109	58685	66101
p	520.518	8.5235	372557	333480	339548	387831	377647	368360	369023	356540	367201	530593	341965	375621
p	995.291	8.52733	14292	7438	N.D.	N.D.	N.D.	13789	N.D.	N.D.	N.D.	N.D.	N.D.	N.D.
p	623.546	8.54108	28050	27997	25859	27217	26208	29263	28205	30849	28765	28129	25669	28083
p	618.514	8.54542	346408	299386	319988	266450	275583	237411	262232	254252	246193	334062	317927	241592
p	583.553	8.54208	23588	23373	24079	22336	22931	21386	22403	22960	23406	25341	24326	23223
p	634.487	8.5421	104882	91229	96653	N.D.	N.D.	79301	79254	74725	77153	84112	78824	69477
p	340.296	8.53955	28059	24159	27507	26788	25910	24682	N.D.	21270	22350	26215	30247	20961
p	578.522	8.55025	244215	214259	220248	188566	167411	183776	182650	176163	174733	253457	225625	178161
p	537.543	8.55067	N.D.	15854	15872	N.D.	N.D.	N.D.	N.D.	17123	N.D.	N.D.	N.D.	N.D.
p	695.635	8.5812	N.D.	37269	20000	N.D.	N.D.	23661	N.D.	N.D.	N.D.	31875	23532	N.D.
p	817.172	8.5797	N.D.	19337	5498	N.D.	26235	26086	18167	19893	23750	44294	27516	29745
p	553.538	8.57	N.D.	8666	N.D.	N.D.	8772	N.D.	10769	N.D.	9865	13431	N.D.	N.D.
p	757.207	8.592	348595	344656	345993	344628	333491	335455	332673	334650	385603	536969	318785	343196
p	798.233	8.5912	39208	31633	29849	32535	31817	31526	33309	40756	32250	N.D.	31800	N.D.
p	760.205	8.593	63099	66692	61907	62015	62398	60802	63362	70811	72710	104367	57992	61733
p	644.528	8.60889	26664	24306	13220	29181	30580	24212	N.D.	N.D.	21136	43496	N.D.	21123
p	1332.32	8.62257	N.D.	8823	N.D.	13877	11809	N.D.	10263	N.D.	14370	26651	12019	N.D.
p	697.24	8.63875	16761	14806	N.D.	17794	17439	15116	17685	N.D.	N.D.	21546	18109	N.D.
p	1113.33	8.642	N.D.	16789	N.D.	N.D.	12572	13023	13551	N.D.	12964	22279	N.D.	N.D.
p	663.559	8.64725	271094	256524	245030	254526	238610	250204	261101	253653	244102	413427	228215	255215
p	668.514	8.65225	144050	126268	134342	115424	113533	114036	138635	120589	125885	214508	107315	113908
p	670.542	8.6865	N.D.	32992	N.D.	45248	N.D.	44596	22032	27321	29477	43661	N.D.	35670
p	692.533	8.69518	12666	13275	11208	N.D.	11678	8928	12311	11088	10641	12131	9407	11384
p	690.964	8.69883	29758	30343	29231	27882	28060	27173	30329	28745	28136	27571	28704	28749
p	1129.28	8.70792	321654	312302	202205	304810	293628	334306	300347	298662	218755	468993	287214	203925
p	722.99	8.72929	N.D.	19603	N.D.	N.D.	17436	16052	N.D.	18230	18056	16330	N.D.	18614
p	1171.3	8.72867	N.D.	14344	15024	N.D.	15156	N.D.	N.D.	N.D.	17865	N.D.	13979	14029
p	655.568	8.76875	20496	17047	15607	904093	940956	840569	28767	28160	13884	24740	24692	12747
p	1441.38	8.79791	47848	45039	41923	N.D.	40994	52056	45220	22841	46083	78209	42995	24603
p	791.59	8.8279	44037	112065	N.D.	52040	54241	N.D.	50792	49826	62560	65245	54363	51619
p	704.487	8.83733	98737	224649	104588	97235	106769	103148	111217	61805	89220	101776	84111	108475
p	543.443	8.84567	15338	17203	16234	16237	15055	16656	17197	15558	15812	16614	17084	14933
p	891.191	8.83227	20765	21788	22894	23215	26694	24006	22250	21666	23472	34447	N.D.	23217
p	805.606	8.84983	122047	303853	129959	123400	127475	123168	130481	132278	128884	160874	135377	131089
p	340.295	8.876	23673	20044	25241	N.D.	17926	18626	21564	19160	20725	22455	19720	18010
p	662.518	8.87975	36463	30493	33963	N.D.	N.D.	N.D.	37020	28518	29875	N.D.	21090	19398
p	646.544	8.8344	131326	106854	69935	N.D.	72975	N.D.	96916	79056	84680	108026	98844	67631
p	606.553	8.889	121862	104297	109138	80574	86394	79633	101147	95924	95408	118270	103464	85173
p	831.225	8.90167	342411	309650	328582	330916	328625	322270	327093	327764	358028	496289	319760	313838
p	872.251	8.90083	103830	102039	99951	111579	113530	113037	104140	107059	118638	161729	109727	107755
p	875.251	8.9	32476	28277	33374	31734	30622	32983	29469	28285	31078	45580	29237	30458
p	834.222	8.90218	75450	70894	69724	73736	73747	76445	N.D.	66626	79410	107777	69968	65388
p	627.361	8.90917	128551	130307	122983	136815	118156	119393	138669	136657	125137	182946	115396	123598
p	1203.3	8.91192	202786	193064	193027	200463	193693	222935	126211	189394	219036	304091	193465	192484
p	771.258	8.9236	N.D.	22540	21482	22529	21424	20775	21612	N.D.	23203	30356	21839	22551
p	598.492	8.91814	N.D.	23991	24011	21644	N.D.	N.D.	21350	21169	21595	N.D.	N.D.	23774
p	819.621	8.95367	26191	50325	25837	22974	27317	25607	26189	26437	28823	29322	274392	27480
p	549.616	8.97167	159117	183930	120810	68521	94368	138361	82113	104231	28122	48249	54272	25400
p	708.366	8.993	14654	16340	16439	N.D.	14040	15566	17273	15539	15656	15174	16415	14956
p	646.447	8.99083	1374437	1418843	1449750	1396572	1381676	1358668	1444814	1433071	1440069	1340497	1366704	1403962
p	927.465	9.00133	10996	10758	10251	9712	9325	8627	10212	10411	10132	7555	9980	9199
p	869.414	8.99325	N.D.	11799	N.D.	N.D.	11715	N.D.	N.D.	12837	14947	N.D.	N.D.	N.D.
p	731.603	9.01927	34987	34511	32845	28803	42943	28994	34960	31636	37404	N.D.	36116	35753
p	771.669	9.02892	32025	30752	35767	28976	29407	30852	31078	32370	30072	46380	30537	29599
p	756.634	9.02742	210975	221473	226703	207702	218865	196653	216448	228800	211404	276480	219436	224808
p	785.686	9.02933	162542	152776	160446	156695	160544	151691	163766	158290	162132	224125	145991	159838
p	698.583	9.03225	2762035	2761489	2735839	2736646	2810871	2633636	2813523	2807083	2657897	4186837	2723720	2750986
p	799.702	9.03108	184509	188431	174108	182886	204966	195996	175178	169987	185102	264406	174212	175212
p	702.586	9.116	N.D.	19192	N.D.	28421	29687	26848	N.D.	16092	N.D.	25134	11169	N.D.
p	683.6	9.07746	15643	14813	11497	625407	633965	574019	25086	22023	N.D.	19914	21102	9843
p	965.208	9.07812	N.D.	19014	21077	18946	16014	N.D.	N.D.	N.D.	18860	29487	22527	18117
p	646.546	9.0431	40085	46279	112013	49611	50529	N.D.	29244	100164	47961	40358	N.D.	37252
p	1277.31	9.09218	N.D.	112422	106902	114179	108632	133736	114084	114152	125903	175234	112441	110463
p	710.561	9.09708	19056	17860	18306	17244	14997	16094	19718	19285	19603	31961	16390	16196
p	905.242	9.1505	358502	350805	340379	349365	359500	363201	337814	347183	391965	527666	361860	353750
p	908.242	9.1505	99572	94361	95289	82721	92986	90317	91392	86518	100615	131737	92368	90452
p	946.268	9.1533	152435	153178	N.D.	165609	157799	142229	156516	153522	171915	245430	N.D.	159859
p	949.268	9.1566	49729	51477	N.D.	52078	53596	51327	49443	48232	51464	82640	N.D.	54056
p	845.276	9.1597	30021	29483	25109	31081	25494	24435	27646	N.D.	27246	35683	26220	N.D.
p	1351.33	9.2505	54140	51628	49269	N.D.	N.D.	59285	51929	48844	55374	83329	N.D.	N.D.
p	1754.48	9.33017	23532	44190	45264	48603	45221	48311	44725	48041	49334	68394	45440	46644
p	711.632	9.34367	12371	10454	9281	378867	395809	345240	17400	14735	8289	15403	14618	7571
p	919.294	9.361	N.D.	35513	39274	34814	N.D.	38329	36538	33477	33739	45881	32663	N.D.
p	1828.5	9.43309	90654	81119	82203	81676	N.D.	94384	79347	82567	88607	117950	83845	81078
p	763.663	9.42691	6936	5478	5591	79603	83686	73490	N.D.	5998	5452	11214	7829	7212
p	709.572	9.50312	8036	9885	9601	N.D.	10178	7397	8711	10961	N.D.	N.D.	N.D.	12881
p	729.668	9.5045	22104	23459	23255	22132	56686	48980	21685	23726	20679	17952	22089	22319
p	375.385	9.50917	83432	88138	85653	87278	84863	84121	85592	87626	87159	104079	84984	85250
p	693.601	9.50825	65106	60599	66691	59696	69337	52340	66759	83328	58925	53475	60630	61006
p	296.233	9.50909	30706	41111	44200	42263	30468	43170	41054	35065	33107	44877	28935	28649
p	1902.51	9.52725	140634	124680	128201	123566	117044	143969	124203	127654	138767	177665	124766	124329
p	993.313	9.5299	38532	57331	38956	38288	N.D.	38407	49959	39647	N.D.	53857	41589	49589
p	1053.28	9.54417	517894	456769	630023	465025	432956	572180	459359	481345	649566	724743	469891	450933
p	1056.28	9.54454	206171	167972	N.D.	179861	160823	199278	168898	181147	241892	275368	182192	176215
p	1094.31	9.54975	117226	105612	105206	109491	151262	121615	108756	104117	202589	170267	98971	103671
p	1097.3	9.5524	59290	45586	42528	44441	N.D.	54505	44678	45588	N.D.	70446	36859	42683
p	739.661	9.5835	10977	12610	9655	323185	333796	293195	17002	14696	11442	16392	14745	9546
p	893.739	9.60573	32974	31583	30606	35150	29630	30218	30067	30212	34255	105793	102159	N.D.
p	898.694	9.60355	12302	12283	11028	11740	11637	9813	11962	10303	9504	38048	37107	N.D.
p	770.632	9.61289	5261	6056	4211	96874	91388	83958	5700	N.D.	4526	N.D.	6205	N.D.
p	1976.54	9.61433	185684	162466	158648	156645	156820	177292	157545	163413	170215	220599	152678	154612
p	765.678	9.61325	15863	17433	14547	281219	290899	251716	18375	14838	13815	22852	18058	14389
p	796.648	9.65233	5897	6324	5326	38697	42799	34024	7638	N.D.	N.D.	8873	6591	N.D.
p	1067.33	9.6771	43979	54129	50219	N.D.	43998	54549	43942	41711	41948	58507	N.D.	43979
p	2050.56	9.69358	217001	197469	197756	194033	191545	213064	187162	196753	212072	274756	185048	192143
p	375.385	9.698	N.D.	18273	N.D.	N.D.	N.D.	16474	18698	16705	16872	N.D.	N.D.	N.D.
p	1127.3	9.69967	571228	668674	682170	686129	665494	993107	663105	697770	723361	798244	718820	674419
p	1168.32	9.70425	N.D.	66649	100789	99127	N.D.	128901	65684	97188	134458	N.D.	N.D.	63710
p	817.708	9.70817	10827	12395	10423	34910	39470	34035	12902	11274	9317	23288	21392	17463
p	862.674	9.722	14697	11879	12808	N.D.	N.D.	N.D.	N.D.	N.D.	N.D.	N.D.	N.D.	N.D.
p	843.722	9.72186	N.D.	5124	N.D.	16240	17408	14353	N.D.	N.D.	N.D.	18605	18433	16139
p	779.692	9.71909	N.D.	22062	20181	47633	60781	47507	23105	19678	17578	28313	20887	17528
p	916.684	9.77812	20091	19094	15247	17362	14997	26999	17561	N.D.	32685	N.D.	N.D.	N.D.
p	874.694	9.75089	6718	6355	5794	N.D.	8445	N.D.	6545	N.D.	5025	57992	65249	51346
p	869.739	9.75667	24276	28794	22095	24814	22499	23510	21835	23002	17702	175649	211608	156942
p	900.711	9.76678	74541	66191	65695	62036	52422	58534	58819	55612	106696	N.D.	N.D.	N.D.
p	895.754	9.76767	219974	197733	198059	214476	179306	248900	178628	178508	147074	676748	645403	559353
p	2124.57	9.76741	228142	215665	212220	207822	209810	229635	194154	211564	219746	284406	201222	208092
p	805.707	9.76908	22744	22952	21715	30472	37666	33998	24757	23466	20391	30633	23939	21583
p	682.587	9.77392	944015	926143	909259	919105	884173	905346	953307	930694	930015	1254932	911046	909825
p	412.299	9.7812	N.D.	23527	35636	35116	N.D.	N.D.	22255	N.D.	N.D.	30851	N.D.	N.D.
p	772.649	9.79789	6816	7515	N.D.	72091	72490	62433	7440	7282	7088	N.D.	6775	N.D.
p	767.692	9.80058	25923	28065	25330	272727	287655	246813	30508	26593	25690	37292	28656	27608
p	1144.35	9.803	21198	17096	N.D.	N.D.	N.D.	N.D.	N.D.	N.D.	N.D.	N.D.	N.D.	17496
p	1141.35	9.80591	43394	42662	67754	66949	62231	72314	60795	69397	N.D.	93533	41972	43209
p	1663.45	9.831	7945	11339	N.D.	N.D.	19677	N.D.	N.D.	N.D.	N.D.	N.D.	15251	N.D.
p	1201.32	9.831	746216	656559	N.D.	657088	634735	960558	630722	442043	1011210	1118088	427503	655653
p	793.708	9.83292	35956	39688	36199	324808	308059	296299	32095	35737	34023	48604	32806	36261
p	2198.59	9.83517	250861	222709	227746	213404	215604	244875	226425	225797	239622	297350	222656	222019
p	1242.34	9.83575	N.D.	70703	69380	N.D.	42836	89150	68979	70279	N.D.	N.D.	70363	69166
p	798.664	9.82325	N.D.	8821	N.D.	77222	90261	79666	N.D.	N.D.	N.D.	N.D.	N.D.	N.D.
p	695.614	9.86283	N.D.	24442	25129	21970	22121	N.D.	N.D.	N.D.	22336	N.D.	N.D.	21174
p	375.385	9.86417	66869	64494	66735	66763	63996	62099	70141	67375	68395	63388	65930	85269
p	824.679	9.86183	13038	12904	12167	47531	50215	41971	14247	11614	9758	16592	14032	11778
p	819.724	9.86467	47634	45544	43976	174700	176180	161088	46014	40019	46108	66976	60132	51471
p	850.694	9.891	N.D.	8254	8164	19605	21228	19930	7678	8932	N.D.	33718	38266	32401
p	781.707	9.89317	27786	34483	32195	69940	75396	61090	35435	31579	30030	41383	33322	31622
p	892.682	9.9006	9384	8177	8169	9270	8235	7325	N.D.	6885	6520	26462	N.D.	26304
p	2272.61	9.89758	240039	207741	217382	212880	208192	236063	207491	212747	236934	291288	202659	208232
p	871.754	9.90518	138221	152157	143135	145054	135162	142205	140193	96464	N.D.	496571	312404	451885
p	845.738	9.89733	28226	28479	25600	65753	69304	59606	26332	26233	25459	117093	126876	109378
p	876.709	9.90742	49485	45848	50963	51091	46033	46302	45024	41349	36697	139689	143518	137495
p	1215.37	9.9167	38404	63817	40895	68096	41233	N.D.	56507	63626	36840	N.D.	51229	37891
p	897.771	9.92518	N.D.	291881	273176	247632	269063	198346	246986	254239	287579	643205	471296	508408
p	902.724	9.92456	76548	79369	88848	91320	87711	82667	N.D.	84384	N.D.	165270	130660	N.D.
p	918.699	9.922	16218	18656	20331	20686	21906	N.D.	N.D.	18331	N.D.	36085	31589	N.D.
p	812.68	9.92243	9731	12219	N.D.	19658	22121	19077	N.D.	12180	N.D.	11314	N.D.	N.D.
p	807.724	9.92592	36841	40478	38457	81147	96197	72809	39337	33550	31707	46792	39720	36000
p	1275.33	9.94636	609323	543674	529807	547220	517754	789168	510147	560077	N.D.	912898	548165	541130
p	1316.36	9.9498	47013	41732	N.D.	40031	23996	54566	36963	40550	32477	N.D.	42821	41588
p	2346.63	9.95625	222008	196731	198470	205227	193223	219783	197306	201405	217388	278042	188064	191785
p	838.694	9.95973	5488	5962	N.D.	10286	11418	8241	6813	6204	5109	8729	6778	5960
p	833.738	9.96645	26016	25242	24855	40258	43707	53031	29118	24181	N.D.	38096	29732	26702
p	859.754	10.0001	8274	8872	N.D.	15056	16550	14142	10793	19816	10839	17830	16947	15337
p	795.724	10.0011	57447	64466	59224	258419	263664	228918	59927	59226	52697	71480	64130	57973
p	681.655	10.011	N.D.	5616	N.D.	N.D.	N.D.	N.D.	N.D.	N.D.	N.D.	6239	3677	4556
p	2420.64	10.0106	N.D.	173175	172765	162754	162927	186593	169680	166545	185243	235703	163813	172341
p	826.695	10.015	17021	20337	19562	93744	98049	85488	19633	21985	17841	22837	21206	18921
p	1289.38	10.0152	53262	49248	46354	46193	47543	42777	48429	44866	45773	63520	52682	45854
p	821.739	10.0228	63834	83589	77062	409894	390733	367070	86026	84246	38328	110136	80331	72795
p	847.754	10.0471	232795	228590	221925	235371	397205	371063	212376	199861	177997	410614	N.D.	276879
p	1349.35	10.0497	416797	369511	362572	367187	354801	493936	347026	375926	514361	618038	370801	366823
p	1390.38	10.0528	21540	10642	18170	20434	18593	23199	N.D.	N.D.	14263	N.D.	N.D.	17606
p	852.711	10.041	52345	55031	55625	50885	89643	77980	52023	50122	52702	91727	84657	80902
p	894.7	10.0568	11143	8900	12592	12125	12162	11866	9783	10377	8830	17888	17119	17114
p	2494.66	10.0629	161272	145463	144412	145199	136408	157330	141987	142998	152938	193632	138329	141441
p	878.724	10.0605	76326	72920	80705	85398	85800	69282	75244	86093	69495	121960	139482	104913
p	873.769	10.0607	307185	266930	296188	347172	289329	187248	292102	285812	276019	650765	N.D.	403181
p	920.713	10.0761	13437	13339	16852	14938	12776	12144	15651	15068	12628	N.D.	23536	16950
p	899.786	10.0779	337180	306890	319105	345695	305971	316582	293777	344801	317220	N.D.	557397	428212
p	814.693	10.0821	N.D.	9710	10112	16515	19997	14762	N.D.	N.D.	9026	10445	10378	N.D.
p	809.738	10.0881	49027	55468	48081	80926	88259	75700	47983	47688	44949	55310	49671	48082
p	1363.4	10.1013	N.D.	24745	25299	15730	14981	N.D.	14181	22952	14072	39731	23065	26964
p	840.709	10.1082	5609	6890	5523	16792	19241	19627	6792	5646	N.D.	7203	6086	5554
p	2568.68	10.1105	128120	112926	110713	110655	108369	122256	110934	113368	120775	150424	111084	107615
p	835.755	10.1081	33803	40515	N.D.	83494	93535	57114	N.D.	N.D.	23549	N.D.	N.D.	31497
p	977.818	10.1188	N.D.	6610	6869	6794	7111	6677	8484	N.D.	N.D.	15231	6324	7621
p	942.783	10.1204	30079	20245	28379	31107	26032	29757	32842	29663	24574	60310	26274	24297
p	861.77	10.1286	N.D.	15986	N.D.	37373	41802	34849	16729	N.D.	N.D.	25457	20216	17671
p	887.785	10.155	N.D.	5108	N.D.	10127	9984	8908	4079	5893	N.D.	18417	8220	7885
p	1423.37	10.1463	222222	211430	206446	211422	200487	N.D.	203977	N.D.	N.D.	338787	202716	200833
p	2077.57	10.1445	27970	26644	N.D.	N.D.	N.D.	N.D.	N.D.	N.D.	N.D.	N.D.	N.D.	N.D.
p	2642.7	10.1547	91200	82472	N.D.	82251	81450	88763	81683	N.D.	86813	117000	N.D.	81401
p	833.74	10.1544	19046	21898	49303	17418	19738	15751	40921	47020	17805	60234	56681	19915
p	828.787	10.1723	83261	96467	75497	75189	77031	69931	80614	77021	76135	67774	99514	85970
p	901.803	10.2106	590819	196319	600944	660703	370132	655674	591789	568144	585793	934262	566771	664056
p	849.77	10.1963	540350	298245	491376	829755	840050	777943	525441	452298	448533	784697	590533	431114
p	828.71	10.1795	14183	13392	11641	35126	36076	30587	15343	12951	12573	N.D.	13786	15760
p	823.755	10.1863	77584	87271	70933	206782	217234	181928	80364	63669	72753	106220	88602	77156
p	870.699	10.1923	13258	11353	11181	20844	19491	18306	12124	11783	11745	14457	14287	12194
p	2717.72	10.1968	N.D.	52566	50693	55309	52352	N.D.	N.D.	55066	N.D.	N.D.	N.D.	N.D.
p	854.726	10.1949	86031	85933	87236	134406	134168	122758	84509	89696	83727	108130	102631	92944
p	875.787	10.2077	679241	673910	622488	532149	890807	840827	662970	666403	571844	1122885	810645	821596
p	576.507	10.2029	37310	37417	35985	44706	53857	49636	40265	38504	37622	50498	43345	43970
p	880.741	10.2089	122733	136692	126668	151527	155381	148896	128206	127951	120841	160489	122853	141277
p	602.522	10.2148	22012	24915	27835	29791	25567	27874	23853	26917	21622	36330	30552	25236
p	906.756	10.2177	116628	103846	N.D.	76035	101647	112350	117300	107156	108529	N.D.	N.D.	N.D.
p	1497.39	10.2327	102057	50109	93958	95427	86173	114757	87364	89553	114268	144698	91932	90257
p	2791.74	10.2366	37183	31946	N.D.	33703	30898	N.D.	33537	31636	35612	49053	33454	32040
p	837.769	10.2556	23032	23448	23077	39478	43419	43107	22741	21308	18601	31754	22250	20488
p	927.815	10.2602	10280	11041	10634	11212	11325	8615	9194	9393	8685	22383	17514	36307
p	842.802	10.2597	23398	26660	22594	22865	23561	19903	22859	19743	21276	20815	30160	24923
p	2865.76	10.2744	21225	18462	20718	N.D.	N.D.	20438	N.D.	15668	N.D.	N.D.	N.D.	N.D.
p	889.801	10.2799	4176	5556	N.D.	15902	16979	14119	5103	N.D.	4286	N.D.	6290	N.D.
p	1571.4	10.3186	32388	28919	28684	27390	26655	N.D.	27457	26445	33462	46130	30862	28858
p	856.82	10.3425	12300000	14100000	10900000	11000000	11500000	10500000	11800000	10900000	11000000	10500000	14800000	12700000
p	583.553	10.3425	498078	586182	457742	450606	481721	445628	494124	464118	464195	430287	603598	534240
p	555.522	10.3434	95609	104609	87782	86448	85629	81674	89330	87850	83371	80451	110380	101259
p	877.747	10.3453	137493	149760	124863	126812	132654	114538	N.D.	131544	132934	114287	159454	144276
p	855.812	10.3496	275002	341792	318554	N.D.	N.D.	N.D.	317256	305089	N.D.	N.D.	393975	321217
p	852.787	10.3522	22793	22098	N.D.	N.D.	N.D.	N.D.	21280	N.D.	N.D.	29815	N.D.	N.D.
p	861.774	10.3468	931413	980752	874861	904008	908218	833417	910452	857008	853107	761112	1025458	937571
p	919.729	10.3688	18894	19412	N.D.	20503	18324	N.D.	20308	18118	18842	16241	N.D.	20875
p	903.816	10.3785	N.D.	102420	121515	164231	164049	139395	123990	116815	100711	159166	133364	139914
p	929.832	10.4021	14351	16580	14860	27463	25036	14564	14924	14629	14131	24501	39121	N.D.
p	865.796	10.404	7073	9547	N.D.	19990	21103	17630	N.D.	7142	N.D.	11161	7117	N.D.
p	908.77	10.3912	13799	19239	N.D.	N.D.	29127	20163	N.D.	16239	N.D.	N.D.	N.D.	N.D.
p	973.715	10.4236	7346	6670	8254	8647	N.D.	N.D.	N.D.	6770	N.D.	11000	N.D.	7422
p	879.817	10.5131	24390	28388	N.D.	N.D.	N.D.	43597	26051	25547	26043	34108	N.D.	25447
p	905.832	10.5293	17349	16715	N.D.	N.D.	N.D.	44597	29678	19392	N.D.	24465	N.D.	21194
p	959.809	10.5204	90187	84048	88233	97724	90712	83860	90979	84436	83339	134835	91937	91842
p	931.848	10.5337	11938	13947	11494	N.D.	N.D.	16237	10358	11464	11144	20559	N.D.	16395
p	251.261	10.5862	7622	6168	N.D.	N.D.	7608	6428	7280	N.D.	N.D.	N.D.	N.D.	N.D.
p	313.284	10.5938	8887	8561	N.D.	7681	N.D.	N.D.	11532	N.D.	N.D.	9735	N.D.	N.D.
p	214.17	10.5924	17058	17184	15736	16978	17368	18223	16026	17508	17042	17068	17773	19775
p	94.0774	10.5926	39585	38169	40039	37241	51335	46017	44310	52140	47536	42390	43684	38648
p	256.217	10.5918	N.D.	28882	N.D.	N.D.	28898	N.D.	N.D.	26078	25915	27689	N.D.	28729
p	174.139	10.5914	32618	32835	34843	36851	33790	33042	35936	36353	35655	33337	35930	36079
p	199.23	10.5892	N.D.	13308	11848	11384	13536	11079	11017	11446	N.D.	11192	11965	12062
p	253.276	10.5931	12857	13246	13240	12836	12810	N.D.	14490	14595	11369	12144	12633	14104
p	375.386	10.5912	8429075	8627375	8564912	8610680	8528250	8085741	8704252	8787618	8492574	8259565	8396774	8602678
p	160.124	10.5923	64442	68965	68464	70115	70412	61393	68044	65520	70137	61586	63411	72039
p	148.124	10.5922	N.D.	17651	21758	N.D.	19396	18125	N.D.	N.D.	N.D.	17344	N.D.	N.D.
p	146.108	10.5927	62693	62439	66513	61565	67397	61798	64478	67438	62441	61817	60645	66084
p	238.216	10.5948	N.D.	142518	140592	N.D.	148602	N.D.	N.D.	147055	N.D.	155285	N.D.	147093
p	293.308	10.5894	14332	14713	14423	14497	14958	14146	13966	14971	15357	14374	14799	12828
p	265.276	10.5917	19375	19867	19840	19482	20288	N.D.	19511	19569	19030	17984	19937	20293
p	120.093	10.5935	19461	18107	19110	21080	19936	18002	20077	19102	16622	N.D.	18454	19915
p	679.62	10.5941	1457268	1482638	1539805	1495402	1492921	1431061	1507441	1543471	1517358	1272422	1445689	1506700
p	657.638	10.5942	99901	102843	102191	105889	104617	97361	104206	104699	101063	11783	12397	103829
p	225.245	10.5928	16287	16900	18458	16764	17304	14984	16538	17261	15193	16052	16117	16072
p	239.261	10.5926	15482	14509	14195	16871	13806	N.D.	13511	15996	14796	13806	16941	16097
p	185.214	10.5932	N.D.	12542	N.D.	12695	N.D.	N.D.	12016	N.D.	12310	13293	N.D.	N.D.
p	108.093	10.5928	37681	42476	41216	42094	40257	40458	43307	43974	43151	37658	50254	43508
p	917.834	10.6276	6110	8395	6253	7437	N.D.	5017	6464	N.D.	N.D.	N.D.	7326	6288
p	912.879	10.6344	22285	26419	21058	19257	20326	19205	20574	19043	18293	18463	26537	22822
p	912.804	10.6432	N.D.	5042	N.D.	3796	4744	N.D.	N.D.	N.D.	N.D.	N.D.	N.D.	3835
p	907.847	10.6459	15606	21375	15592	22411	23418	N.D.	N.D.	N.D.	17572	21050	16892	14747
p	2417.69	10.7547	N.D.	18887	N.D.	N.D.	17842	N.D.	18668	N.D.	18693	25786	16819	20545
p	2491.7	10.7773	N.D.	23755	N.D.	N.D.	N.D.	N.D.	23020	21905	N.D.	N.D.	N.D.	N.D.
p	2565.72	10.8	N.D.	21010	N.D.	20929	21294	22693	21441	19546	N.D.	N.D.	20397	N.D.
p	2788.79	10.865	13955	15209	N.D.	N.D.	6349	N.D.	N.D.	N.D.	N.D.	N.D.	N.D.	N.D.
p	375.385	10.9611	49577	54326	48542	50599	47697	49504	50075	54090	51436	44860	50825	54916
p	191.879	0.6088	15703	N.D.	36097	23622	N.D.	N.D.	N.D.	29008	N.D.	9118	N.D.	N.D.
p	615.451	0.8428	N.D.	N.D.	N.D.	N.D.	128534	N.D.	N.D.	120404	N.D.	41589	40927	117382
p	731.533	0.830833	N.D.	N.D.	N.D.	77131	N.D.	155888	44509	N.D.	N.D.	39125	145736	41443
p	706.478	0.7595	N.D.	N.D.	N.D.	N.D.	N.D.	N.D.	N.D.	N.D.	N.D.	4438	N.D.	6649
p	452.332	0.791	78846	N.D.	N.D.	552180	41100	N.D.	371461	N.D.	N.D.	540357	N.D.	N.D.
p	172.07	0.796571	45021	N.D.	47649	N.D.	N.D.	30792	41417	43443	N.D.	30897	N.D.	55111
p	216.096	0.800428	112455	N.D.	N.D.	N.D.	N.D.	N.D.	92263	89966	84594	92094	114824	130986
p	346.221	0.8476	131905	N.D.	N.D.	N.D.	85542	37163	N.D.	225839	N.D.	125323	N.D.	N.D.
p	716.452	0.8272	45471	N.D.	N.D.	61997	N.D.	N.D.	28865	N.D.	N.D.	63593	16443	N.D.
p	356.123	0.841333	61833	N.D.	N.D.	N.D.	15318	8541	49058	N.D.	N.D.	21282	15996	N.D.
p	490.288	0.871875	40787	N.D.	19270	73159	N.D.	32724	38587	N.D.	N.D.	61987	28656	14024
p	308.119	0.833	N.D.	N.D.	N.D.	N.D.	N.D.	23383	N.D.	26513	N.D.	40535	29396	28908
p	354.162	0.835333	N.D.	N.D.	N.D.	N.D.	N.D.	N.D.	N.D.	19979	N.D.	20147	N.D.	16593
p	236.102	0.861143	N.D.	N.D.	20940	N.D.	23255	22876	N.D.	22021	33157	48619	21163	N.D.
p	836.335	0.8476	13548	N.D.	N.D.	16832	N.D.	N.D.	14030	N.D.	N.D.	17005	8745	N.D.
p	412.145	0.8585	N.D.	N.D.	N.D.	17611	9569	N.D.	17937	N.D.	N.D.	22607	N.D.	N.D.
p	366.131	0.8595	N.D.	N.D.	N.D.	N.D.	N.D.	N.D.	N.D.	N.D.	N.D.	36591	33504	N.D.
p	354.105	0.8704	21300	N.D.	N.D.	N.D.	16011	N.D.	N.D.	10370	N.D.	35505	21293	N.D.
p	294.143	0.8795	N.D.	N.D.	N.D.	N.D.	32545	37709	38494	N.D.	38408	37557	N.D.	50035
p	400.148	0.8955	N.D.	N.D.	N.D.	N.D.	N.D.	N.D.	N.D.	N.D.	N.D.	22067	14342	N.D.
p	350.169	0.91125	N.D.	N.D.	N.D.	22793	32901	N.D.	N.D.	26566	N.D.	23230	N.D.	N.D.
p	538.2	0.89	N.D.	N.D.	N.D.	N.D.	N.D.	N.D.	N.D.	N.D.	N.D.	8625	9694	10098
p	462.257	0.89575	19739	N.D.	N.D.	26280	N.D.	N.D.	N.D.	N.D.	N.D.	34751	19754	N.D.
p	356.182	0.886	N.D.	N.D.	63161	N.D.	44317	N.D.	N.D.	30635	44064	23394	23894	N.D.
p	164.082	0.890333	N.D.	N.D.	29596	N.D.	N.D.	N.D.	N.D.	N.D.	N.D.	24934	N.D.	27437
p	317.181	0.9152	43345	N.D.	N.D.	N.D.	N.D.	N.D.	68486	69407	N.D.	58580	59059	N.D.
p	152.083	0.896143	N.D.	N.D.	N.D.	39448	37837	58788	N.D.	N.D.	48348	57734	44371	60091
p	331.199	0.9125	N.D.	N.D.	N.D.	N.D.	35829	20263	N.D.	N.D.	N.D.	41037	41071	N.D.
p	308.16	0.915333	N.D.	N.D.	39687	32703	N.D.	33246	26221	N.D.	N.D.	27902	27717	N.D.
p	810.503	0.9105	N.D.	N.D.	N.D.	N.D.	N.D.	N.D.	N.D.	N.D.	N.D.	19730	13100	N.D.
p	520.3	0.914	N.D.	N.D.	N.D.	N.D.	N.D.	N.D.	N.D.	N.D.	N.D.	28899	46547	N.D.
p	180.114	0.916889	N.D.	N.D.	29173	N.D.	39512	30122	40250	24240	29617	44203	48373	32403
p	752.462	0.913667	N.D.	N.D.	N.D.	N.D.	N.D.	N.D.	19286	N.D.	N.D.	21780	14062	N.D.
p	478.251	0.918333	N.D.	N.D.	N.D.	N.D.	N.D.	N.D.	N.D.	30013	N.D.	24674	N.D.	58671
p	852.57	0.918	N.D.	N.D.	N.D.	N.D.	N.D.	N.D.	N.D.	25305	N.D.	23306	22630	N.D.
p	908.617	0.921667	N.D.	N.D.	N.D.	N.D.	N.D.	13772	N.D.	N.D.	N.D.	26737	N.D.	15336
p	2013.41	0.928333	N.D.	N.D.	28965	N.D.	31398	N.D.	N.D.	N.D.	24262	75102	27835	27727
p	298.177	0.916667	N.D.	N.D.	N.D.	N.D.	N.D.	N.D.	36063	N.D.	43602	31749	N.D.	N.D.
p	359.193	0.907	N.D.	N.D.	N.D.	20159	N.D.	32131	N.D.	N.D.	N.D.	28983	17367	N.D.
p	180.15	0.935	N.D.	N.D.	17022	N.D.	N.D.	8858	N.D.	21329	N.D.	35451	49382	N.D.
p	2101.47	0.9245	N.D.	N.D.	N.D.	N.D.	13017	N.D.	N.D.	13741	N.D.	36221	14091	N.D.
p	1096.81	0.927875	N.D.	N.D.	40387	N.D.	42836	41990	N.D.	51733	38324	41225	38626	59189
p	673.492	0.938	N.D.	N.D.	N.D.	58086	N.D.	N.D.	N.D.	N.D.	N.D.	120134	128101	135909
p	2057.42	0.9245	N.D.	N.D.	17588	N.D.	16214	N.D.	N.D.	N.D.	N.D.	43289	N.D.	16163
p	384.21	0.9291	N.D.	N.D.	41832	14969	43857	31386	60149	35154	37949	60248	37665	64756
p	1723.22	0.926	N.D.	N.D.	35615	N.D.	N.D.	N.D.	N.D.	33365	35031	69448	34069	N.D.
p	616.454	0.894167	13400	N.D.	34622	N.D.	N.D.	34696	N.D.	N.D.	32618	32332	29663	N.D.
p	1969.38	0.9275	N.D.	N.D.	N.D.	N.D.	N.D.	N.D.	N.D.	N.D.	N.D.	42676	N.D.	19735
p	1253.91	0.93175	N.D.	N.D.	34319	N.D.	29701	29318	N.D.	28311	26526	41956	27065	28939
p	359.229	0.929	N.D.	N.D.	16032	N.D.	23219	N.D.	22029	N.D.	N.D.	18230	N.D.	14826
p	1649.18	0.929333	N.D.	N.D.	27203	N.D.	24919	31636	N.D.	N.D.	N.D.	55532	25792	25651
p	288.174	0.92	N.D.	N.D.	N.D.	N.D.	85256	N.D.	13998	N.D.	N.D.	27238	140916	N.D.
p	552.301	0.934	N.D.	N.D.	N.D.	N.D.	N.D.	N.D.	N.D.	N.D.	N.D.	25385	37864	N.D.
p	408.209	0.90575	27325	N.D.	46480	11106	31544	N.D.	N.D.	27344	29607	26134	N.D.	30864
p	166.135	0.934833	N.D.	N.D.	18964	N.D.	N.D.	N.D.	N.D.	24674	21300	29268	30609	31941
p	1135.8	0.939	N.D.	N.D.	4449	N.D.	N.D.	N.D.	N.D.	N.D.	4915	6495	4550	N.D.
p	1709.2	0.9258	N.D.	N.D.	N.D.	N.D.	26791	N.D.	N.D.	25584	29778	81860	N.D.	26904
p	1507.06	0.9334	N.D.	N.D.	N.D.	N.D.	14655	23764	N.D.	15106	N.D.	34035	N.D.	15802
p	1633.14	0.931667	N.D.	N.D.	N.D.	N.D.	N.D.	N.D.	N.D.	44783	N.D.	62825	N.D.	41363
p	178.134	0.937143	N.D.	N.D.	19315	N.D.	20839	35053	N.D.	19454	17351	12478	N.D.	14076
p	440.235	0.926375	N.D.	N.D.	27556	N.D.	45011	29286	N.D.	21808	21087	14913	25433	21884
p	250.155	0.9384	51005	N.D.	34686	N.D.	50750	38162	N.D.	N.D.	N.D.	33822	N.D.	N.D.
p	698.484	0.9345	N.D.	N.D.	N.D.	N.D.	N.D.	17266	N.D.	N.D.	30790	17419	10404	N.D.
p	479.303	0.934	N.D.	N.D.	22695	N.D.	N.D.	N.D.	N.D.	N.D.	13829	30592	16459	N.D.
p	124.089	0.918667	N.D.	N.D.	47651	N.D.	77623	72802	N.D.	58895	N.D.	41177	N.D.	94070
p	1517.07	0.9325	N.D.	N.D.	N.D.	N.D.	N.D.	N.D.	N.D.	N.D.	N.D.	23065	N.D.	42098
p	235.158	0.9356	N.D.	N.D.	17074	N.D.	N.D.	N.D.	N.D.	12334	N.D.	24948	21456	44859
p	298.211	0.9404	N.D.	N.D.	N.D.	N.D.	N.D.	31310	18370	11884	N.D.	26505	29416	N.D.
p	531.372	0.934857	N.D.	N.D.	N.D.	N.D.	39971	49134	N.D.	47683	41437	34080	42714	44299
p	382.241	0.8635	N.D.	N.D.	N.D.	N.D.	N.D.	N.D.	N.D.	N.D.	N.D.	28036	121329	N.D.
p	345.214	0.941333	N.D.	N.D.	45859	30253	32213	47479	21763	29558	N.D.	35753	23386	21493
p	294.218	0.940875	N.D.	N.D.	39159	N.D.	25145	23758	N.D.	37926	34754	36025	30405	40248
p	252.17	0.93875	N.D.	N.D.	N.D.	23761	N.D.	N.D.	N.D.	27545	N.D.	26890	22836	N.D.
p	222.161	0.936889	N.D.	N.D.	16027	16532	19038	28292	12790	N.D.	24754	41963	22834	16989
p	424.204	0.940125	38574	N.D.	50905	N.D.	48966	39944	N.D.	N.D.	41271	37104	44192	42896
p	176.046	0.943	N.D.	N.D.	13807	N.D.	18735	11663	N.D.	19102	17023	15050	15130	29248
p	511.404	0.9485	N.D.	N.D.	N.D.	48187	N.D.	N.D.	N.D.	67985	65685	61892	N.D.	N.D.
p	404.249	0.943	N.D.	N.D.	N.D.	N.D.	N.D.	N.D.	N.D.	25099	25329	19239	22890	26761
p	1391	0.93875	N.D.	N.D.	N.D.	N.D.	12656	N.D.	N.D.	N.D.	13562	19827	17792	N.D.
p	638.516	0.9445	N.D.	N.D.	15547	N.D.	19286	N.D.	13162	15968	19287	36650	18702	15591
p	684.992	0.951667	N.D.	N.D.	N.D.	N.D.	14963	N.D.	N.D.	N.D.	N.D.	36448	N.D.	13328
p	572.327	0.94925	N.D.	N.D.	N.D.	N.D.	N.D.	N.D.	19722	N.D.	N.D.	39323	61699	50151
p	400.257	0.969	N.D.	N.D.	N.D.	35868	N.D.	N.D.	18604	35023	33511	40877	N.D.	N.D.
p	587.341	0.9588	N.D.	N.D.	N.D.	16768	N.D.	14381	N.D.	N.D.	43900	33960	N.D.	18398
p	199.192	0.9652	N.D.	N.D.	23698	19550	17144	N.D.	N.D.	N.D.	N.D.	20621	27698	N.D.
p	303.29	0.974333	N.D.	N.D.	34639	N.D.	32172	N.D.	N.D.	28647	32159	35792	N.D.	34362
p	298.25	0.9664	N.D.	N.D.	N.D.	N.D.	30587	31869	N.D.	N.D.	44800	35204	N.D.	34177
p	607.7	0.986833	N.D.	N.D.	34795	N.D.	6075	N.D.	N.D.	40047	24608	46062	63544	N.D.
p	1503.09	0.987429	N.D.	N.D.	53357	N.D.	40055	55799	N.D.	N.D.	54464	151514	38075	58008
p	790.695	0.9966	N.D.	N.D.	55421	N.D.	N.D.	N.D.	N.D.	76971	40255	90444	130763	N.D.
p	297.264	0.9875	N.D.	N.D.	N.D.	N.D.	N.D.	14639	N.D.	31643	N.D.	30334	N.D.	19322
p	539.433	1.0254	N.D.	N.D.	N.D.	N.D.	N.D.	15989	N.D.	20300	N.D.	40266	20237	20167
p	641.5	1.0175	N.D.	N.D.	N.D.	N.D.	N.D.	N.D.	N.D.	N.D.	N.D.	26592	12935	N.D.
p	355.316	1.02071	7946	N.D.	N.D.	N.D.	8286	N.D.	N.D.	14989	9193	14760	31627	18363
p	1619.16	0.998333	N.D.	N.D.	N.D.	N.D.	N.D.	N.D.	N.D.	N.D.	14254	44550	N.D.	44449
p	284.162	0.958333	N.D.	N.D.	N.D.	N.D.	N.D.	N.D.	65831	N.D.	N.D.	45281	45975	N.D.
p	364.126	1.20725	N.D.	N.D.	N.D.	N.D.	32960	N.D.	40771	N.D.	N.D.	47196	N.D.	36853
p	314.113	1.28367	65808	N.D.	N.D.	69898	N.D.	61469	80753	75556	52373	73434	64987	65997
p	218.165	1.421	13693	N.D.	N.D.	N.D.	N.D.	N.D.	N.D.	37769	N.D.	17053	N.D.	9712
p	349.263	1.7146	N.D.	N.D.	N.D.	N.D.	59118	N.D.	91142	64474	59140	108138	N.D.	N.D.
p	258.238	1.7588	67275	N.D.	N.D.	N.D.	N.D.	60685	67785	N.D.	N.D.	70808	N.D.	63249
p	266.176	1.78475	N.D.	N.D.	N.D.	363979	294829	N.D.	N.D.	N.D.	N.D.	321732	N.D.	318159
p	278.15	1.98057	118341	N.D.	107901	N.D.	53903	N.D.	80113	122616	N.D.	91003	N.D.	101414
p	241.275	2.0421	40764	N.D.	36702	62012	38866	69363	N.D.	32910	38187	34594	32495	56499
p	317.291	2.57967	N.D.	N.D.	N.D.	N.D.	N.D.	N.D.	N.D.	N.D.	N.D.	50200	46604	36762
p	608.457	2.8475	26253	N.D.	N.D.	25235	N.D.	24030	24911	25715	N.D.	27032	25418	23808
p	795.539	2.97843	N.D.	N.D.	N.D.	43714	44700	46646	37755	N.D.	N.D.	79612	38129	48236
p	330.36	3.295	24590	N.D.	N.D.	N.D.	N.D.	20034	N.D.	N.D.	N.D.	28978	22327	22172
p	1909.39	3.42338	17197	N.D.	50022	42432	N.D.	53581	N.D.	21994	39999	168791	N.D.	50988
p	90.0459	3.44586	N.D.	N.D.	79640	N.D.	110330	98814	N.D.	N.D.	94073	110134	99972	114006
p	1086.2	3.4531	108859	N.D.	140747	N.D.	151791	182987	161095	145907	152580	128721	124909	131247
p	1175.13	3.4594	17984	N.D.	21004	17579	N.D.	21883	25547	23507	26881	24115	20671	21232
p	299.28	3.46333	N.D.	N.D.	N.D.	N.D.	N.D.	N.D.	N.D.	N.D.	N.D.	51433	46978	39313
p	238.227	3.7545	N.D.	N.D.	16190	10326	N.D.	N.D.	N.D.	13996	N.D.	16073	20150	19896
p	606.03	3.8339	460836	N.D.	N.D.	415962	280197	250179	333158	425798	527197	436601	489253	431167
p	544.107	3.8336	N.D.	N.D.	N.D.	9030	N.D.	N.D.	7471	N.D.	24560	43768	27539	N.D.
p	602.16	3.83367	N.D.	N.D.	N.D.	N.D.	N.D.	N.D.	N.D.	N.D.	15870	39748	19998	N.D.
p	483.254	3.88933	N.D.	N.D.	N.D.	N.D.	16451	N.D.	N.D.	N.D.	N.D.	13432	N.D.	17798
p	269.233	4.04237	N.D.	N.D.	6651	12742	14475	14664	21848	14337	N.D.	15438	11179	N.D.
p	479.414	4.0165	53080	N.D.	N.D.	77940	N.D.	N.D.	N.D.	N.D.	N.D.	51520	42029	N.D.
p	329.326	4.095	N.D.	N.D.	N.D.	N.D.	N.D.	N.D.	N.D.	N.D.	N.D.	29765	26608	N.D.
p	358.305	4.19317	481411	N.D.	356843	N.D.	N.D.	N.D.	N.D.	225812	N.D.	259085	74175	207208
p	538.062	4.28388	30872	N.D.	N.D.	N.D.	N.D.	13409	21127	29035	26471	41277	66353	32702
p	309.301	4.26133	N.D.	N.D.	N.D.	N.D.	N.D.	N.D.	128016	N.D.	N.D.	78704	N.D.	108505
p	435.389	4.3155	55125	N.D.	N.D.	68467	25927	20762	52215	25122	N.D.	52656	41612	N.D.
p	620.294	4.388	N.D.	N.D.	N.D.	N.D.	N.D.	N.D.	N.D.	N.D.	N.D.	57046	98818	N.D.
p	394.376	4.59875	N.D.	N.D.	N.D.	15862	N.D.	20131	15838	13552	14123	9860	22542	13208
p	777.566	4.4382	N.D.	N.D.	N.D.	21707	N.D.	27002	29380	N.D.	23909	82418	N.D.	N.D.
p	602.043	4.7856	28489	N.D.	28555	N.D.	N.D.	5070	N.D.	N.D.	7538	12698	N.D.	N.D.
p	1013.24	4.919	N.D.	N.D.	N.D.	N.D.	N.D.	N.D.	N.D.	N.D.	N.D.	11358	33990	N.D.
p	735.517	5.039	N.D.	N.D.	N.D.	N.D.	N.D.	N.D.	N.D.	N.D.	N.D.	62907	56995	N.D.
p	739.21	5.0712	N.D.	N.D.	17280	N.D.	16900	16869	N.D.	N.D.	N.D.	16506	N.D.	16125
p	644.992	5.094	N.D.	N.D.	N.D.	N.D.	N.D.	N.D.	N.D.	N.D.	N.D.	17566	14897	N.D.
p	606.03	5.09212	N.D.	N.D.	249242	244896	288864	N.D.	213800	274212	N.D.	331290	336499	252574
p	758.222	5.14917	N.D.	N.D.	20251	N.D.	21125	19015	16655	21714	N.D.	19553	N.D.	N.D.
p	758.556	5.14743	22681	N.D.	20096	22943	N.D.	N.D.	22424	N.D.	N.D.	18925	24399	20108
p	778.239	5.2178	13054	N.D.	N.D.	N.D.	15081	N.D.	N.D.	13519	N.D.	12573	14162	N.D.
p	551.241	5.45771	30426	N.D.	N.D.	40513	N.D.	33249	54687	N.D.	46172	45025	38420	N.D.
p	874.305	5.5642	7728	N.D.	8122	N.D.	N.D.	N.D.	N.D.	N.D.	N.D.	8157	9987	9717
p	419.396	5.56857	19143	N.D.	15188	18288	N.D.	N.D.	32113	N.D.	N.D.	20122	19201	9777
p	598.415	5.688	N.D.	N.D.	N.D.	N.D.	N.D.	N.D.	N.D.	N.D.	N.D.	67213	80546	61836
p	614.391	5.68767	N.D.	N.D.	N.D.	N.D.	N.D.	N.D.	N.D.	N.D.	N.D.	74817	75060	75112
p	796.145	5.77175	N.D.	N.D.	N.D.	N.D.	N.D.	N.D.	15896	N.D.	12560	45081	15583	N.D.
p	751.495	6.25167	N.D.	N.D.	N.D.	N.D.	N.D.	N.D.	N.D.	N.D.	N.D.	42432	44073	44802
p	735.519	6.25033	N.D.	N.D.	N.D.	N.D.	N.D.	N.D.	N.D.	N.D.	N.D.	75634	78825	70072
p	695.526	6.25567	N.D.	N.D.	N.D.	N.D.	N.D.	N.D.	N.D.	N.D.	N.D.	33171	31177	25785
p	661.486	6.3085	N.D.	N.D.	N.D.	N.D.	N.D.	N.D.	N.D.	N.D.	N.D.	52201	N.D.	19720
p	446.335	6.29843	142623	N.D.	247063	N.D.	190211	248709	547994	N.D.	N.D.	249037	N.D.	203607
p	1089.79	6.32714	14213	N.D.	11407	N.D.	N.D.	N.D.	10191	10850	N.D.	9891	10546	7360
p	857.189	6.356	7540	N.D.	6008	N.D.	N.D.	N.D.	N.D.	N.D.	N.D.	21655	N.D.	N.D.
p	688.167	6.4305	19922	N.D.	18387	N.D.	31038	N.D.	N.D.	35047	N.D.	78752	42588	N.D.
p	788.681	6.35675	N.D.	N.D.	17067	N.D.	N.D.	N.D.	N.D.	N.D.	16394	19706	16325	N.D.
p	890.26	6.49986	67316	N.D.	46950	40808	71187	N.D.	86951	56085	N.D.	90098	N.D.	N.D.
p	515.414	6.486	13445	N.D.	12259	39253	51105	37562	21188	19738	N.D.	18613	N.D.	N.D.
p	742.663	6.609	9188	N.D.	N.D.	9916	N.D.	N.D.	N.D.	17610	11722	7167	9679	N.D.
p	2244.23	6.666	12153	N.D.	N.D.	N.D.	N.D.	14062	N.D.	N.D.	N.D.	12474	N.D.	6587
p	1461.47	6.67625	235199	N.D.	N.D.	206308	N.D.	217816	210660	217734	232367	251656	208355	N.D.
p	702.56	6.7472	N.D.	N.D.	N.D.	32890	22180	30481	N.D.	14799	N.D.	23955	N.D.	N.D.
p	444.416	6.76886	N.D.	N.D.	13372	13323	12454	21445	13811	N.D.	17591	17870	N.D.	N.D.
p	931.206	6.89967	N.D.	N.D.	N.D.	N.D.	N.D.	N.D.	16662	15637	N.D.	28591	N.D.	N.D.
p	888.215	6.91788	N.D.	N.D.	N.D.	40140	35674	45734	38744	N.D.	54370	68908	40305	43989
p	944.18	6.91533	N.D.	N.D.	N.D.	N.D.	29213	32290	N.D.	N.D.	36632	49168	24856	28881
p	967.277	6.90233	N.D.	N.D.	9669	43522	41494	N.D.	25715	N.D.	N.D.	66940	41574	N.D.
p	748.632	6.869	50145	N.D.	50990	39897	54157	46631	48918	52181	N.D.	52175	N.D.	39428
p	693.606	7.0076	1227205	N.D.	N.D.	N.D.	N.D.	N.D.	1171899	1000662	N.D.	6814068	1073665	N.D.
p	822.495	7.08975	12183	N.D.	N.D.	N.D.	N.D.	N.D.	9368	N.D.	N.D.	20944	N.D.	12394
p	638.502	7.057	72774	N.D.	80727	85985	72849	81167	81888	97863	N.D.	42360	89058	93388
p	830.616	7.25767	N.D.	N.D.	N.D.	85868	63579	N.D.	52715	N.D.	64336	151086	N.D.	28815
p	982.857	7.19	22034	N.D.	23549	N.D.	N.D.	13854	11955	20014	21260	26592	N.D.	16204
p	564.677	7.23356	N.D.	N.D.	87347	93399	28177	90203	N.D.	56867	100683	55908	11317	103640
p	474.367	7.2225	N.D.	N.D.	N.D.	N.D.	N.D.	N.D.	34747	13876	N.D.	19407	18907	N.D.
p	1156.36	7.22082	115122	N.D.	114507	139704	115721	109854	71282	118662	122397	117972	136335	106518
p	1159.38	7.2258	N.D.	N.D.	N.D.	N.D.	22441	19574	N.D.	21062	N.D.	20625	N.D.	16690
p	867.732	7.2809	1288595	N.D.	3433215	999141	1033309	3328466	N.D.	3121413	1121723	8944449	938168	3683760
p	565.683	7.24082	478067	N.D.	253339	92665	198580	196419	38928	336675	201188	693426	385793	76302
p	1533.36	7.2505	N.D.	N.D.	N.D.	N.D.	N.D.	N.D.	32964	N.D.	34667	32352	31194	N.D.
p	850.703	7.32044	75269	N.D.	N.D.	299200	71566	82811	N.D.	142895	293622	584898	74671	187791
p	428.077	7.285	N.D.	N.D.	N.D.	N.D.	N.D.	49670	N.D.	N.D.	46873	53122	42453	N.D.
p	962.235	7.30822	42163	N.D.	54069	N.D.	42771	N.D.	38353	55696	62117	76898	55206	53667
p	502.095	7.3017	44380	N.D.	42058	45368	44967	46660	N.D.	46721	48518	78768	46405	48679
p	908.743	7.39075	N.D.	N.D.	N.D.	147721	N.D.	N.D.	N.D.	N.D.	42091	251987	N.D.	164512
p	1004.74	7.4527	15354	N.D.	20110	N.D.	20024	20593	21246	20491	18957	42447	19862	20796
p	1000.76	7.393	N.D.	N.D.	N.D.	N.D.	N.D.	N.D.	N.D.	N.D.	N.D.	10281	11682	8289
p	980.663	7.41867	N.D.	N.D.	N.D.	N.D.	N.D.	N.D.	N.D.	N.D.	N.D.	9108	8808	6952
p	938.67	7.4675	N.D.	N.D.	N.D.	N.D.	N.D.	N.D.	N.D.	N.D.	N.D.	6073	5845	N.D.
p	648.646	7.5485	25701	N.D.	20826	N.D.	22285	N.D.	17488	25952	N.D.	21716	22374	26637
p	733.556	7.5554	N.D.	N.D.	N.D.	92170	53691	98970	N.D.	65705	N.D.	91274	N.D.	N.D.
p	522.506	7.608	N.D.	N.D.	N.D.	N.D.	N.D.	N.D.	N.D.	N.D.	N.D.	16241	N.D.	10748
p	654.455	7.61467	N.D.	N.D.	N.D.	N.D.	N.D.	N.D.	N.D.	N.D.	N.D.	32715	26350	30503
p	1215.97	7.63617	N.D.	N.D.	N.D.	8600	9018	8073	6378	8437	N.D.	22837	N.D.	N.D.
p	1233	7.6115	N.D.	N.D.	N.D.	N.D.	N.D.	N.D.	N.D.	N.D.	N.D.	36890	25221	N.D.
p	633.526	7.62325	N.D.	N.D.	N.D.	N.D.	7534	N.D.	N.D.	N.D.	N.D.	28572	20881	20293
p	653.588	7.63067	N.D.	N.D.	N.D.	N.D.	N.D.	N.D.	N.D.	N.D.	N.D.	136925	95470	81110
p	720.629	7.67467	N.D.	N.D.	N.D.	N.D.	N.D.	N.D.	28535	30510	N.D.	67745	N.D.	N.D.
p	815.64	7.633	N.D.	N.D.	N.D.	N.D.	N.D.	N.D.	N.D.	N.D.	N.D.	119566	121479	N.D.
p	1020.22	7.66643	24096	N.D.	19393	N.D.	N.D.	N.D.	21656	22977	N.D.	45332	25746	23097
p	517.405	7.6591	22152	N.D.	24013	18442	45165	45993	51253	45603	26683	47193	N.D.	19593
p	160.018	7.6594	N.D.	N.D.	N.D.	N.D.	15159	15711	15381	N.D.	N.D.	14088	N.D.	17576
p	328.205	7.665	N.D.	N.D.	N.D.	N.D.	65093	N.D.	N.D.	N.D.	107279	95609	97430	N.D.
p	493.554	7.765	N.D.	N.D.	17699	15698	16796	13610	19049	N.D.	14885	27957	18975	N.D.
p	772.524	7.8642	21214	N.D.	N.D.	16913	15652	N.D.	N.D.	N.D.	N.D.	14017	17246	N.D.
p	851.638	7.84333	N.D.	N.D.	N.D.	N.D.	N.D.	N.D.	N.D.	N.D.	N.D.	26544	29887	23802
p	843.67	7.86133	N.D.	N.D.	N.D.	N.D.	N.D.	N.D.	N.D.	N.D.	N.D.	76144	75812	69034
p	681.621	7.869	N.D.	N.D.	N.D.	N.D.	N.D.	N.D.	N.D.	N.D.	N.D.	67112	74998	N.D.
p	614.482	7.88633	N.D.	N.D.	N.D.	N.D.	N.D.	N.D.	N.D.	N.D.	N.D.	90244	78681	62162
p	609.525	7.884	N.D.	N.D.	N.D.	N.D.	N.D.	N.D.	N.D.	N.D.	N.D.	28784	25216	23254
p	1186.33	7.9765	130608	N.D.	113142	78098	N.D.	79435	122549	N.D.	126508	164836	N.D.	103583
p	640.5	7.9755	N.D.	N.D.	N.D.	N.D.	N.D.	N.D.	46875	N.D.	40565	87281	55962	N.D.
p	884.537	7.96167	N.D.	N.D.	N.D.	N.D.	N.D.	N.D.	N.D.	N.D.	N.D.	15471	19518	13237
p	604.462	8.04117	N.D.	N.D.	N.D.	130141	139253	121788	11062	8856	N.D.	8043	N.D.	N.D.
p	599.507	8.06175	N.D.	N.D.	N.D.	254549	262996	231255	N.D.	N.D.	N.D.	8268	N.D.	N.D.
p	653.589	8.0065	N.D.	N.D.	N.D.	N.D.	N.D.	N.D.	N.D.	N.D.	N.D.	19798	32935	N.D.
p	843.672	8.04067	N.D.	N.D.	N.D.	N.D.	N.D.	N.D.	N.D.	N.D.	N.D.	130287	148867	110148
p	681.621	8.05267	N.D.	N.D.	N.D.	N.D.	N.D.	N.D.	N.D.	N.D.	N.D.	107126	108915	90295
p	525.507	8.14067	N.D.	N.D.	N.D.	N.D.	N.D.	N.D.	5477	4822	N.D.	10447	N.D.	N.D.
p	312.264	8.1585	N.D.	N.D.	29978	46798	58760	46786	N.D.	N.D.	N.D.	34844	39041	N.D.
p	761.586	8.18367	N.D.	N.D.	N.D.	26289	22731	32122	N.D.	10687	N.D.	16363	N.D.	6564
p	645.589	8.1905	N.D.	N.D.	N.D.	N.D.	N.D.	N.D.	N.D.	N.D.	N.D.	11475	5350	N.D.
p	1260.35	8.2018	114724	N.D.	98852	N.D.	105065	115798	104296	101108	108213	95738	64375	100536
p	1263.35	8.2045	N.D.	N.D.	N.D.	N.D.	N.D.	N.D.	N.D.	N.D.	N.D.	57962	34830	N.D.
p	616.498	8.22012	60471	N.D.	N.D.	133579	133745	128885	75838	N.D.	N.D.	92187	84447	107927
p	1023.27	8.20929	N.D.	N.D.	24971	N.D.	22950	27133	25531	N.D.	N.D.	35594	25372	24607
p	787.601	8.20567	N.D.	N.D.	N.D.	50309	39162	48054	27270	79993	N.D.	79739	N.D.	N.D.
p	734.645	8.31	N.D.	N.D.	N.D.	N.D.	N.D.	N.D.	N.D.	N.D.	26273	53543	19099	N.D.
p	921.272	8.239	6777	N.D.	N.D.	N.D.	N.D.	7611	6085	N.D.	20590	20863	N.D.	N.D.
p	928.666	8.347	N.D.	N.D.	N.D.	N.D.	N.D.	N.D.	N.D.	N.D.	N.D.	7071	20859	N.D.
p	658.508	8.3456	N.D.	N.D.	N.D.	135872	19351	22481	N.D.	N.D.	N.D.	27878	26239	N.D.
p	844.612	8.3355	N.D.	N.D.	N.D.	N.D.	N.D.	N.D.	N.D.	N.D.	N.D.	5816	8765	N.D.
p	681.619	8.39833	N.D.	N.D.	N.D.	N.D.	N.D.	N.D.	N.D.	N.D.	N.D.	34156	33849	28647
p	627.538	8.4221	15250	N.D.	10543	529201	546453	464565	23479	22307	N.D.	17195	23018	9412
p	709.652	8.41067	N.D.	N.D.	N.D.	N.D.	N.D.	N.D.	N.D.	N.D.	N.D.	20853	23836	13419
p	893.683	8.4145	N.D.	N.D.	N.D.	N.D.	N.D.	N.D.	N.D.	N.D.	N.D.	18189	N.D.	14392
p	1061.24	8.47125	N.D.	N.D.	N.D.	N.D.	N.D.	N.D.	14636	8661	15136	21434	N.D.	N.D.
p	622.355	8.46791	19695	N.D.	21719	17621	20496	22295	24711	19228	30279	26007	22644	23524
p	396.372	8.47767	N.D.	N.D.	N.D.	N.D.	N.D.	N.D.	N.D.	N.D.	N.D.	23278	30782	22656
p	874.601	8.478	N.D.	N.D.	N.D.	N.D.	N.D.	N.D.	N.D.	N.D.	N.D.	28905	36275	28458
p	858.626	8.48167	N.D.	N.D.	N.D.	N.D.	N.D.	N.D.	N.D.	N.D.	N.D.	96802	124916	90971
p	930.681	8.49	N.D.	N.D.	N.D.	N.D.	N.D.	N.D.	N.D.	N.D.	N.D.	15312	N.D.	9893
p	853.672	8.482	N.D.	N.D.	N.D.	N.D.	N.D.	N.D.	N.D.	N.D.	N.D.	31090	33713	24782
p	904.667	8.495	N.D.	N.D.	N.D.	N.D.	N.D.	N.D.	N.D.	N.D.	N.D.	16780	28980	N.D.
p	799.233	8.5855	N.D.	N.D.	N.D.	N.D.	N.D.	N.D.	N.D.	N.D.	N.D.	36006	N.D.	24874
p	604.536	8.60375	N.D.	N.D.	N.D.	23801	20342	N.D.	N.D.	N.D.	N.D.	18034	11973	N.D.
p	666.562	8.6345	N.D.	N.D.	9954	N.D.	N.D.	N.D.	9094	N.D.	N.D.	16882	6818	N.D.
p	1367.36	8.62336	157770	N.D.	137414	137636	138426	154523	140803	76527	147570	236708	138580	129897
p	1408.39	8.62571	N.D.	N.D.	N.D.	12802	12953	14920	13184	N.D.	13723	25345	N.D.	8452
p	684.487	8.65587	75142	N.D.	N.D.	42371	43653	N.D.	64147	N.D.	56171	83427	51574	53643
p	932.699	8.65533	N.D.	N.D.	N.D.	N.D.	N.D.	N.D.	N.D.	N.D.	N.D.	79472	88508	72197
p	892.707	8.654	N.D.	N.D.	N.D.	N.D.	N.D.	N.D.	N.D.	N.D.	N.D.	23009	27023	20971
p	927.745	8.65567	N.D.	N.D.	N.D.	N.D.	N.D.	N.D.	N.D.	N.D.	N.D.	50072	54558	48096
p	948.672	8.65667	N.D.	N.D.	N.D.	N.D.	N.D.	N.D.	N.D.	N.D.	N.D.	31425	36783	28450
p	968.769	8.66933	N.D.	N.D.	N.D.	N.D.	N.D.	N.D.	N.D.	N.D.	N.D.	8871	10371	8754
p	901.728	8.68333	N.D.	N.D.	N.D.	N.D.	N.D.	N.D.	N.D.	N.D.	N.D.	17900	18847	13743
p	906.68	8.681	N.D.	N.D.	N.D.	N.D.	N.D.	N.D.	N.D.	N.D.	N.D.	33046	33628	24382
p	922.653	8.684	N.D.	N.D.	N.D.	N.D.	N.D.	N.D.	N.D.	N.D.	N.D.	11652	11204	9604
p	870.557	8.711	N.D.	N.D.	N.D.	N.D.	N.D.	N.D.	N.D.	N.D.	N.D.	74074	79466	70241
p	396.372	8.71433	N.D.	N.D.	N.D.	N.D.	N.D.	N.D.	N.D.	N.D.	N.D.	44037	45981	34187
p	855.686	8.71833	N.D.	N.D.	N.D.	N.D.	N.D.	N.D.	N.D.	N.D.	N.D.	24871	25599	21390
p	860.642	8.72067	N.D.	N.D.	N.D.	N.D.	N.D.	N.D.	N.D.	N.D.	N.D.	116715	134896	106670
p	876.616	8.721	N.D.	N.D.	N.D.	N.D.	N.D.	N.D.	N.D.	N.D.	N.D.	32602	36791	27931
p	1170.3	8.73233	23890	N.D.	N.D.	21131	N.D.	21078	20433	14086	N.D.	33341	N.D.	N.D.
p	660.521	8.76767	9107	N.D.	7473	346417	355809	312130	16276	18485	N.D.	9097	12843	N.D.
p	1069.31	8.7522	3973	N.D.	N.D.	N.D.	N.D.	25376	N.D.	N.D.	6498	12243	N.D.	7908
p	822.627	8.80633	N.D.	N.D.	N.D.	N.D.	N.D.	N.D.	N.D.	N.D.	N.D.	16046	18589	13901
p	908.699	8.844	N.D.	N.D.	N.D.	N.D.	N.D.	N.D.	N.D.	N.D.	N.D.	41413	44023	38932
p	903.743	8.84833	N.D.	N.D.	N.D.	N.D.	N.D.	N.D.	N.D.	N.D.	N.D.	32379	37351	24836
p	924.673	8.843	N.D.	N.D.	N.D.	N.D.	N.D.	N.D.	N.D.	N.D.	N.D.	15925	20838	14507
p	548.549	8.865	N.D.	N.D.	8476	N.D.	8020	6606	N.D.	N.D.	6447	14229	N.D.	N.D.
p	950.687	8.86033	N.D.	N.D.	N.D.	N.D.	N.D.	N.D.	N.D.	N.D.	N.D.	16082	15502	12835
p	934.715	8.86633	N.D.	N.D.	N.D.	N.D.	N.D.	N.D.	N.D.	N.D.	N.D.	40878	44529	33512
p	929.758	8.861	N.D.	N.D.	N.D.	N.D.	N.D.	N.D.	N.D.	N.D.	N.D.	33610	32684	26514
p	892.704	8.884	N.D.	N.D.	N.D.	N.D.	N.D.	N.D.	N.D.	N.D.	N.D.	19736	N.D.	18627
p	852.616	8.91667	N.D.	N.D.	N.D.	N.D.	N.D.	N.D.	N.D.	N.D.	N.D.	36917	50883	38877
p	836.642	8.922	N.D.	N.D.	N.D.	N.D.	N.D.	N.D.	N.D.	N.D.	N.D.	188116	N.D.	182767
p	396.372	8.929	N.D.	N.D.	N.D.	N.D.	N.D.	N.D.	N.D.	N.D.	N.D.	151336	186684	137081
p	878.631	8.954	N.D.	N.D.	N.D.	N.D.	N.D.	N.D.	N.D.	N.D.	N.D.	7327	9279	8459
p	862.658	8.95833	N.D.	N.D.	N.D.	N.D.	N.D.	N.D.	N.D.	N.D.	N.D.	40645	50584	40629
p	891.396	8.99257	7246	N.D.	9560	8109	N.D.	7305	8431	N.D.	N.D.	5467	7288	N.D.
p	714.571	9.11025	N.D.	N.D.	N.D.	141757	148554	130813	N.D.	N.D.	N.D.	74697	N.D.	N.D.
p	905.758	9.013	N.D.	N.D.	N.D.	N.D.	N.D.	N.D.	N.D.	N.D.	N.D.	21113	23261	19335
p	884.699	9.00367	N.D.	N.D.	N.D.	N.D.	N.D.	N.D.	N.D.	N.D.	N.D.	14652	9426	7829
p	879.738	9.022	N.D.	N.D.	N.D.	N.D.	N.D.	N.D.	N.D.	N.D.	N.D.	20315	13159	12859
p	931.774	9.08133	N.D.	N.D.	N.D.	N.D.	N.D.	N.D.	N.D.	N.D.	N.D.	14150	16168	12303
p	936.728	9.08167	N.D.	N.D.	N.D.	N.D.	N.D.	N.D.	N.D.	N.D.	N.D.	18406	17995	15299
p	848.274	9.1515	N.D.	N.D.	N.D.	N.D.	4291	3815	N.D.	N.D.	N.D.	6477	4542	N.D.
p	907.775	9.196	N.D.	N.D.	N.D.	N.D.	N.D.	N.D.	N.D.	N.D.	N.D.	15111	15661	11391
p	1680.46	9.215	20205	N.D.	15964	7838	N.D.	N.D.	18325	N.D.	20335	30725	N.D.	N.D.
p	880.647	9.215	N.D.	N.D.	N.D.	N.D.	N.D.	N.D.	N.D.	N.D.	N.D.	2898	4660	N.D.
p	864.674	9.22233	N.D.	N.D.	N.D.	N.D.	N.D.	N.D.	N.D.	N.D.	N.D.	23519	32703	21395
p	728.565	9.23467	N.D.	N.D.	N.D.	12983	N.D.	N.D.	N.D.	N.D.	N.D.	21719	26871	N.D.
p	889.708	9.2425	N.D.	N.D.	N.D.	N.D.	N.D.	N.D.	N.D.	N.D.	N.D.	10828	11982	N.D.
p	1039.23	9.27637	15198	N.D.	18179	17419	N.D.	17703	N.D.	N.D.	19600	20973	15408	18288
p	716.587	9.3405	4385	N.D.	N.D.	138851	141923	122140	7571	N.D.	N.D.	9357	N.D.	N.D.
p	730.58	9.40717	N.D.	N.D.	N.D.	20830	19477	16242	N.D.	N.D.	N.D.	31663	28919	21790
p	979.26	9.36191	452540	N.D.	395786	416839	402553	420340	378926	394668	476388	637488	409887	393491
p	982.261	9.36255	147178	N.D.	123741	136911	131946	142222	124596	133145	147083	205707	125045	123453
p	737.647	9.37828	5379	N.D.	N.D.	241717	248528	221869	7908	6500	N.D.	8808	N.D.	N.D.
p	1425.35	9.389	17185	N.D.	16233	17323	13926	18601	14902	16296	18174	28210	N.D.	15588
p	891.722	9.44675	N.D.	N.D.	N.D.	N.D.	N.D.	N.D.	3807	N.D.	N.D.	36591	40718	85839
p	896.677	9.42	N.D.	N.D.	N.D.	N.D.	N.D.	N.D.	N.D.	N.D.	N.D.	15295	17199	N.D.
p	1113.24	9.445	N.D.	N.D.	13873	11304	N.D.	14602	12441	N.D.	16166	24942	N.D.	12215
p	654.556	9.5144	N.D.	N.D.	N.D.	7756	8144	9461	N.D.	10049	N.D.	8557	N.D.	N.D.
p	782.599	9.504	N.D.	N.D.	N.D.	22044	N.D.	N.D.	N.D.	12912	8419	15903	N.D.	N.D.
p	867.724	9.58267	N.D.	N.D.	N.D.	N.D.	N.D.	N.D.	N.D.	N.D.	N.D.	84769	87016	77842
p	872.678	9.58367	N.D.	N.D.	N.D.	N.D.	N.D.	N.D.	N.D.	N.D.	N.D.	29274	32520	24042
p	914.667	9.58633	N.D.	N.D.	N.D.	N.D.	N.D.	N.D.	N.D.	N.D.	N.D.	10511	11627	9406
p	888.653	9.586	N.D.	N.D.	N.D.	N.D.	N.D.	N.D.	N.D.	N.D.	N.D.	10425	10914	10346
p	803.691	9.599	N.D.	N.D.	N.D.	N.D.	7224	N.D.	N.D.	N.D.	N.D.	7114	5178	N.D.
p	478.506	9.62571	6505	N.D.	6941	N.D.	6717	N.D.	N.D.	N.D.	7685	9966	6017	7146
p	639.608	9.64775	N.D.	N.D.	4659	N.D.	N.D.	N.D.	N.D.	N.D.	4173	6313	4939	N.D.
p	791.694	9.656	N.D.	N.D.	N.D.	110991	119405	88925	20231	16164	15418	29567	22064	N.D.
p	753.676	9.6775	N.D.	N.D.	11823	51506	54323	49396	N.D.	12013	N.D.	17413	10139	8669
p	822.662	9.6875	N.D.	N.D.	N.D.	10831	12752	11811	N.D.	N.D.	N.D.	6372	4541	4070
p	1169.32	9.7055	71390	N.D.	N.D.	N.D.	66843	N.D.	N.D.	N.D.	N.D.	97670	64907	N.D.
p	890.667	9.74267	N.D.	N.D.	N.D.	N.D.	N.D.	N.D.	N.D.	N.D.	N.D.	12721	16566	13781
p	878.726	9.753	N.D.	N.D.	N.D.	N.D.	N.D.	N.D.	N.D.	N.D.	N.D.	218358	206691	212426
p	699.605	9.7722	43134	N.D.	N.D.	48665	54465	45144	50370	47565	56740	70380	66502	53084
p	653.625	9.79425	5200	N.D.	N.D.	N.D.	3930	N.D.	N.D.	N.D.	N.D.	5966	4147	N.D.
p	831.721	9.813	N.D.	N.D.	N.D.	11566	N.D.	10918	8267	7760	N.D.	16462	N.D.	N.D.
p	857.738	9.82967	N.D.	N.D.	N.D.	N.D.	N.D.	N.D.	N.D.	N.D.	N.D.	9278	9359	8250
p	693.603	9.85675	42331	N.D.	N.D.	N.D.	N.D.	N.D.	32898	46202	N.D.	33740	N.D.	N.D.
p	506.537	9.89338	5282	N.D.	5903	6513	N.D.	4308	6757	5489	N.D.	9548	N.D.	5650
p	923.786	9.96267	N.D.	N.D.	N.D.	N.D.	N.D.	N.D.	N.D.	N.D.	N.D.	6477	4779	10539
p	864.709	9.997	N.D.	N.D.	N.D.	4902	N.D.	N.D.	N.D.	N.D.	N.D.	5962	N.D.	5404
p	885.768	9.99967	N.D.	N.D.	N.D.	N.D.	N.D.	N.D.	N.D.	N.D.	N.D.	7717	6526	6550
p	868.683	10.0389	N.D.	N.D.	N.D.	13347	13704	11085	8729	N.D.	N.D.	12139	12510	11279
p	1391.38	10.0543	N.D.	N.D.	N.D.	N.D.	N.D.	N.D.	12620	12055	N.D.	26411	12206	N.D.
p	982.773	10.1129	15585	N.D.	10085	N.D.	5048	N.D.	8607	N.D.	N.D.	16454	6808	10121
p	1037.79	10.1483	N.D.	N.D.	35787	38534	36905	34711	40970	33947	35148	66163	36267	38599
p	550.49	10.1919	12941	N.D.	N.D.	32033	30402	28381	N.D.	19531	N.D.	20090	18727	N.D.
p	2716.71	10.1962	60650	N.D.	N.D.	N.D.	N.D.	62201	N.D.	N.D.	58145	76761	52518	52566
p	1845.46	10.2133	N.D.	N.D.	39503	20922	13747	N.D.	N.D.	N.D.	17049	42461	N.D.	18691
p	884.773	10.2208	N.D.	N.D.	113194	N.D.	N.D.	19733	N.D.	N.D.	N.D.	155096	131788	N.D.
p	955.849	10.4565	N.D.	N.D.	N.D.	N.D.	N.D.	N.D.	N.D.	N.D.	N.D.	6004	N.D.	9487
p	964.765	10.5335	N.D.	N.D.	11539	11543	10067	N.D.	10097	11933	N.D.	17393	11195	11271
p	957.859	10.5663	N.D.	N.D.	N.D.	N.D.	N.D.	N.D.	N.D.	5782	N.D.	5490	5076	N.D.
p	422.387	10.5523	N.D.	N.D.	N.D.	N.D.	N.D.	N.D.	N.D.	N.D.	N.D.	13831	17258	10851
p	396.372	10.5713	N.D.	N.D.	N.D.	N.D.	N.D.	N.D.	N.D.	N.D.	N.D.	55686	70102	61422
p	202.17	10.5928	15119	N.D.	N.D.	N.D.	12874	N.D.	N.D.	15316	14121	14635	14804	N.D.
p	279.292	10.5908	10567	N.D.	11079	10867	11595	11828	10873	11519	11954	10150	10844	10588
p	695.593	10.5935	N.D.	N.D.	N.D.	N.D.	N.D.	N.D.	N.D.	N.D.	N.D.	80157	86164	N.D.
p	265.234	10.5956	16099	N.D.	N.D.	N.D.	16851	N.D.	N.D.	N.D.	15499	19065	15533	N.D.
p	933.86	10.653	N.D.	N.D.	N.D.	N.D.	N.D.	N.D.	N.D.	N.D.	N.D.	6807	N.D.	4348
p	959.876	10.661	6033	N.D.	5737	6989	6786	N.D.	5891	N.D.	5109	10121	7278	6288
p	2490.69	10.78	N.D.	N.D.	22725	21464	N.D.	20762	N.D.	N.D.	N.D.	33793	N.D.	N.D.
p	2639.74	10.8225	N.D.	N.D.	21051	N.D.	20261	N.D.	17125	N.D.	N.D.	27605	20411	21714
p	2713.76	10.843	16846	N.D.	N.D.	N.D.	N.D.	N.D.	N.D.	N.D.	N.D.	25145	18080	N.D.
p	321.838	0.7005	N.D.	N.D.	21962	N.D.	46041	34746	N.D.	N.D.	27890	N.D.	17089	27446
p	232.905	0.6685	32544	N.D.	28430	N.D.	15731	N.D.	N.D.	N.D.	N.D.	N.D.	N.D.	16811
p	679.562	0.734	N.D.	N.D.	34005	N.D.	9190	12958	N.D.	9437	12941	N.D.	N.D.	10068
p	999.403	0.737	N.D.	N.D.	N.D.	5288	7650	N.D.	N.D.	N.D.	N.D.	N.D.	N.D.	N.D.
p	592.629	0.733333	14194	N.D.	N.D.	N.D.	34468	38890	N.D.	N.D.	N.D.	N.D.	N.D.	N.D.
p	238.081	0.8214	N.D.	N.D.	12135	N.D.	9622	10031	N.D.	N.D.	N.D.	N.D.	12282	10759
p	266.112	0.835167	46005	N.D.	N.D.	N.D.	40510	42576	54882	N.D.	N.D.	N.D.	69998	53827
p	165.083	0.8435	N.D.	N.D.	N.D.	N.D.	50752	78504	N.D.	N.D.	N.D.	N.D.	N.D.	N.D.
p	200.104	0.836333	N.D.	N.D.	36900	16947	30425	62767	N.D.	11327	N.D.	N.D.	8471	N.D.
p	142.062	0.843	N.D.	N.D.	N.D.	N.D.	91799	46516	N.D.	N.D.	N.D.	N.D.	N.D.	69953
p	110.036	0.8672	N.D.	N.D.	N.D.	N.D.	28964	32418	N.D.	28728	27863	N.D.	N.D.	27728
p	108.057	0.871	N.D.	N.D.	N.D.	N.D.	54061	N.D.	N.D.	44074	49911	N.D.	N.D.	N.D.
p	275.171	0.8885	N.D.	N.D.	N.D.	N.D.	14621	26346	N.D.	N.D.	N.D.	N.D.	N.D.	N.D.
p	168.113	0.906571	N.D.	N.D.	N.D.	N.D.	24917	27521	28911	32119	56749	N.D.	17018	60143
p	510.24	0.901	N.D.	N.D.	10604	N.D.	10982	N.D.	N.D.	11755	9399	N.D.	N.D.	N.D.
p	100.052	0.903667	N.D.	N.D.	45242	N.D.	44878	N.D.	N.D.	46549	77201	N.D.	32673	92880
p	182.13	0.919428	N.D.	N.D.	15560	N.D.	22780	37884	21419	15101	36579	N.D.	23030	N.D.
p	206.13	0.923	N.D.	N.D.	N.D.	N.D.	19210	N.D.	20929	17393	18418	N.D.	N.D.	N.D.
p	326.172	0.912	N.D.	N.D.	35902	21646	37018	N.D.	N.D.	56045	74222	N.D.	N.D.	N.D.
p	678.45	0.920333	28367	N.D.	N.D.	N.D.	22776	N.D.	24898	N.D.	26522	N.D.	33568	28318
p	358.161	0.919429	N.D.	N.D.	46404	N.D.	41473	33546	N.D.	22964	34122	N.D.	81503	78279
p	254.15	0.91625	36042	N.D.	83648	N.D.	56592	58306	32392	50483	84667	N.D.	N.D.	53682
p	968.652	0.919167	N.D.	N.D.	15809	N.D.	12214	13435	N.D.	14999	14286	N.D.	15019	N.D.
p	2073.45	0.922	N.D.	N.D.	N.D.	N.D.	16412	16095	N.D.	N.D.	N.D.	N.D.	N.D.	N.D.
p	790.577	0.92575	N.D.	N.D.	N.D.	N.D.	57067	N.D.	N.D.	56621	N.D.	N.D.	49580	54490
p	1079.78	0.9244	N.D.	N.D.	N.D.	N.D.	78165	N.D.	N.D.	75138	78487	N.D.	76594	77223
p	2131.5	0.9255	N.D.	N.D.	14637	N.D.	13604	N.D.	N.D.	N.D.	N.D.	N.D.	11991	14321
p	1985.39	0.924333	N.D.	N.D.	N.D.	N.D.	23561	21467	N.D.	18700	21533	N.D.	23993	20215
p	965.171	0.9245	N.D.	N.D.	N.D.	N.D.	5590	4949	N.D.	N.D.	N.D.	N.D.	N.D.	N.D.
p	1781.26	0.925571	N.D.	N.D.	33094	N.D.	37134	38843	N.D.	35579	37473	N.D.	35191	34402
p	765.52	0.9304	N.D.	N.D.	15559	N.D.	18932	23221	N.D.	15064	N.D.	N.D.	N.D.	36858
p	446.282	0.9156	N.D.	N.D.	68787	N.D.	36846	N.D.	29069	N.D.	66118	N.D.	N.D.	44808
p	1691.2	0.931667	N.D.	N.D.	N.D.	N.D.	25076	23418	N.D.	N.D.	24523	N.D.	N.D.	N.D.
p	216.15	0.935286	N.D.	N.D.	18659	N.D.	19436	19723	N.D.	21824	25267	N.D.	19332	23054
p	417.236	0.93475	20505	N.D.	17961	N.D.	22253	35787	N.D.	N.D.	N.D.	N.D.	N.D.	N.D.
p	701.52	0.9378	N.D.	N.D.	39463	20126	38116	34755	N.D.	N.D.	N.D.	N.D.	N.D.	31292
p	440.198	0.923667	N.D.	N.D.	21852	N.D.	19198	N.D.	N.D.	22678	20342	N.D.	17456	22833
p	751.505	0.9318	N.D.	N.D.	16930	N.D.	15234	21927	N.D.	N.D.	14091	N.D.	N.D.	12527
p	168.15	0.940333	N.D.	N.D.	13991	N.D.	14405	26433	6345	21493	N.D.	N.D.	N.D.	12002
p	453.287	0.9325	N.D.	N.D.	17199	N.D.	30552	N.D.	N.D.	N.D.	N.D.	N.D.	19116	16286
p	633.357	0.938	N.D.	N.D.	N.D.	N.D.	12857	9134	N.D.	N.D.	7757	N.D.	N.D.	N.D.
p	550.34	0.943	N.D.	N.D.	7998	N.D.	66398	N.D.	N.D.	14416	26772	N.D.	N.D.	N.D.
p	264.17	0.940833	N.D.	N.D.	39049	N.D.	17573	13924	N.D.	18622	N.D.	N.D.	25581	21957
p	82.0789	0.937333	N.D.	N.D.	N.D.	N.D.	11262	10768	N.D.	23261	N.D.	N.D.	N.D.	N.D.
p	552.417	0.95025	65001	N.D.	12749	N.D.	8951	29855	N.D.	N.D.	N.D.	N.D.	N.D.	N.D.
p	498.237	0.931833	18291	N.D.	17099	N.D.	13707	N.D.	13295	14381	N.D.	N.D.	N.D.	16157
p	436.357	0.956	N.D.	N.D.	N.D.	28959	11804	N.D.	N.D.	N.D.	N.D.	N.D.	N.D.	N.D.
p	352.221	0.9286	N.D.	N.D.	N.D.	N.D.	24446	18286	N.D.	31524	19840	N.D.	18282	N.D.
p	282.218	0.94875	N.D.	N.D.	23489	N.D.	27302	27194	N.D.	N.D.	N.D.	N.D.	N.D.	26611
p	424.127	0.952667	N.D.	N.D.	N.D.	N.D.	8602	7034	N.D.	N.D.	N.D.	N.D.	N.D.	6925
p	453.362	0.947	N.D.	N.D.	11296	N.D.	8842	8801	N.D.	7857	N.D.	N.D.	N.D.	14534
p	399.292	0.943	N.D.	N.D.	N.D.	N.D.	10490	17957	N.D.	12847	N.D.	N.D.	N.D.	N.D.
p	589.357	0.952667	N.D.	N.D.	N.D.	15120	27957	15843	N.D.	N.D.	N.D.	N.D.	N.D.	N.D.
p	450.351	0.9635	69370	N.D.	24771	17131	29729	N.D.	N.D.	N.D.	N.D.	N.D.	N.D.	N.D.
p	225.113	0.9435	17117	N.D.	N.D.	31481	24574	N.D.	N.D.	N.D.	N.D.	N.D.	N.D.	34142
p	280.238	0.98275	N.D.	N.D.	N.D.	37765	41914	N.D.	19545	N.D.	N.D.	N.D.	59921	N.D.
p	669.534	2.7156	N.D.	N.D.	42284	N.D.	40247	N.D.	26011	N.D.	N.D.	N.D.	41327	43183
p	312.332	2.85671	13893	N.D.	N.D.	14483	12676	16591	16235	12215	N.D.	N.D.	N.D.	13250
p	604.16	2.8624	30701	N.D.	52753	49269	59675	54060	N.D.	N.D.	N.D.	N.D.	N.D.	N.D.
p	464.224	3.21025	N.D.	N.D.	N.D.	26121	22537	26745	N.D.	N.D.	N.D.	N.D.	N.D.	25909
p	664.987	3.362	N.D.	N.D.	N.D.	17521	13979	N.D.	N.D.	N.D.	N.D.	N.D.	N.D.	N.D.
p	407.298	4.01612	220781	N.D.	243380	157158	154201	156680	161770	N.D.	N.D.	N.D.	144984	253348
p	566.089	3.88533	N.D.	N.D.	8857	5966	6819	N.D.	N.D.	N.D.	N.D.	N.D.	N.D.	N.D.
p	627.182	4.24711	95580	N.D.	48780	60938	67313	67512	79624	73995	71105	N.D.	N.D.	80149
p	795.539	4.48417	34310	N.D.	41885	37131	47565	N.D.	N.D.	49493	N.D.	N.D.	N.D.	35383
p	463.362	4.82463	72218	N.D.	46302	39476	45258	43842	N.D.	43724	N.D.	N.D.	49018	39642
p	477.378	4.938	24824	N.D.	N.D.	N.D.	17293	N.D.	11917	N.D.	15161	N.D.	N.D.	N.D.
p	758.889	5.15033	N.D.	N.D.	N.D.	N.D.	12252	14444	N.D.	N.D.	N.D.	N.D.	14902	N.D.
p	777.571	5.23038	21889	N.D.	25701	27238	23990	25242	21825	N.D.	20412	N.D.	N.D.	24267
p	540.061	5.26	N.D.	N.D.	N.D.	10512	17483	N.D.	N.D.	N.D.	N.D.	N.D.	N.D.	N.D.
p	704.198	5.40686	21875	N.D.	N.D.	21878	11518	N.D.	20135	20858	N.D.	N.D.	19673	17422
p	463.419	5.3098	23456	N.D.	N.D.	27841	13509	N.D.	21293	N.D.	N.D.	N.D.	17890	N.D.
p	836.279	5.43625	N.D.	N.D.	13748	13189	16268	N.D.	N.D.	N.D.	12148	N.D.	N.D.	N.D.
p	835.946	5.43267	16362	N.D.	N.D.	N.D.	18467	16546	N.D.	16805	13152	N.D.	17347	N.D.
p	855.294	5.49988	12017	N.D.	14326	N.D.	14901	15250	N.D.	14028	14675	N.D.	13041	14983
p	734.466	5.5462	26280	N.D.	N.D.	N.D.	22132	22676	21778	N.D.	N.D.	N.D.	N.D.	26033
p	365.363	5.73567	39553	N.D.	45727	N.D.	39651	42744	N.D.	N.D.	39783	N.D.	N.D.	40866
p	749.548	5.75883	97341	N.D.	N.D.	N.D.	92800	N.D.	103120	N.D.	86173	N.D.	87567	96706
p	803.786	6.29075	N.D.	N.D.	N.D.	22915	25183	24268	N.D.	N.D.	28714	N.D.	N.D.	N.D.
p	854.192	6.37575	24144	N.D.	21449	29936	23332	N.D.	21633	26683	32994	N.D.	N.D.	15852
p	603.484	6.353	N.D.	N.D.	N.D.	N.D.	6998	9122	N.D.	N.D.	N.D.	N.D.	N.D.	11625
p	606.695	6.802	N.D.	N.D.	N.D.	N.D.	1652970	1169773	N.D.	N.D.	N.D.	N.D.	1321748	N.D.
p	545.476	6.85629	N.D.	N.D.	105464	135918	96868	109428	71189	N.D.	78098	N.D.	93122	N.D.
p	705.524	6.91325	N.D.	N.D.	N.D.	23025	20956	29486	N.D.	9473	N.D.	N.D.	N.D.	N.D.
p	731.683	6.989	N.D.	N.D.	N.D.	N.D.	7960	N.D.	N.D.	N.D.	6643	N.D.	5399	6349
p	741.525	7.02533	N.D.	N.D.	N.D.	37965	47277	42585	N.D.	N.D.	N.D.	N.D.	N.D.	N.D.
p	548.401	7.122	N.D.	N.D.	N.D.	23481	35283	N.D.	N.D.	N.D.	N.D.	N.D.	N.D.	N.D.
p	543.445	7.10825	N.D.	N.D.	N.D.	59026	61474	51848	N.D.	N.D.	N.D.	N.D.	15311	N.D.
p	925.253	7.0505	N.D.	N.D.	N.D.	467851	79025	N.D.	N.D.	N.D.	N.D.	N.D.	N.D.	N.D.
p	1040.91	7.14933	N.D.	N.D.	10658	N.D.	8357	11583	N.D.	11899	8947	N.D.	N.D.	11175
p	606.655	7.19033	N.D.	N.D.	N.D.	N.D.	260143	N.D.	269736	N.D.	252567	N.D.	N.D.	N.D.
p	1532.36	7.2395	N.D.	N.D.	N.D.	7899	9793	N.D.	N.D.	N.D.	N.D.	N.D.	N.D.	N.D.
p	589.677	7.2585	N.D.	N.D.	N.D.	1779215	1913788	N.D.	N.D.	N.D.	N.D.	N.D.	N.D.	N.D.
p	717.525	7.313	N.D.	N.D.	N.D.	54292	20295	42048	N.D.	N.D.	N.D.	N.D.	N.D.	N.D.
p	569.709	7.42167	N.D.	N.D.	N.D.	N.D.	20680	22400	22649	N.D.	N.D.	N.D.	N.D.	N.D.
p	732.63	7.639	N.D.	N.D.	N.D.	16369	19986	N.D.	38973	N.D.	35861	N.D.	N.D.	15657
p	576.432	7.64167	N.D.	N.D.	N.D.	46372	46031	64081	N.D.	N.D.	N.D.	N.D.	N.D.	N.D.
p	592.406	7.627	N.D.	N.D.	N.D.	19042	20087	17448	N.D.	N.D.	N.D.	N.D.	N.D.	N.D.
p	571.476	7.63667	N.D.	N.D.	N.D.	99290	102655	89356	N.D.	N.D.	N.D.	N.D.	N.D.	N.D.
p	1092.22	7.668	48578	N.D.	37696	41937	35728	48745	N.D.	40350	52050	N.D.	27943	37350
p	464.456	7.65355	22874	N.D.	44738	48076	48528	51477	41313	N.D.	47990	N.D.	45937	49199
p	1037.25	7.66867	N.D.	N.D.	N.D.	N.D.	30310	40199	N.D.	N.D.	N.D.	N.D.	35596	N.D.
p	597.489	7.71133	N.D.	N.D.	N.D.	54343	57931	53758	N.D.	N.D.	N.D.	N.D.	N.D.	N.D.
p	578.426	7.7155	N.D.	N.D.	N.D.	30501	29257	N.D.	N.D.	N.D.	N.D.	N.D.	N.D.	N.D.
p	562.452	7.72225	21455	N.D.	N.D.	65224	66268	58793	N.D.	N.D.	N.D.	N.D.	N.D.	N.D.
p	522.461	7.72333	N.D.	N.D.	N.D.	33728	35900	36223	N.D.	N.D.	N.D.	N.D.	N.D.	N.D.
p	602.446	7.73833	N.D.	N.D.	N.D.	32854	44582	21418	N.D.	N.D.	N.D.	N.D.	N.D.	N.D.
p	745.555	7.786	N.D.	N.D.	N.D.	76416	74342	77187	N.D.	N.D.	N.D.	N.D.	N.D.	N.D.
p	588.468	7.79	N.D.	N.D.	N.D.	33893	38203	33842	N.D.	N.D.	N.D.	N.D.	N.D.	N.D.
p	732.631	7.755	N.D.	N.D.	N.D.	N.D.	29898	32907	N.D.	N.D.	N.D.	N.D.	N.D.	N.D.
p	766.424	7.86333	N.D.	N.D.	N.D.	N.D.	4536	N.D.	N.D.	N.D.	N.D.	N.D.	4102	4349
p	730.478	7.8648	8557	N.D.	7107	N.D.	6256	6960	N.D.	N.D.	N.D.	N.D.	7603	N.D.
p	576.467	7.931	N.D.	N.D.	N.D.	20733	20281	22219	N.D.	N.D.	N.D.	N.D.	N.D.	N.D.
p	628.443	7.9785	N.D.	N.D.	N.D.	36500	15268	N.D.	N.D.	N.D.	N.D.	N.D.	N.D.	N.D.
p	620.435	8.06	N.D.	N.D.	N.D.	33694	36614	36068	N.D.	N.D.	N.D.	N.D.	N.D.	N.D.
p	758.621	8.05	N.D.	N.D.	N.D.	49640	27972	31898	N.D.	N.D.	N.D.	N.D.	N.D.	N.D.
p	586.536	8.101	N.D.	N.D.	N.D.	17336	18609	20843	N.D.	N.D.	12872	N.D.	14647	N.D.
p	625.521	8.139	N.D.	N.D.	N.D.	118807	125189	123149	N.D.	N.D.	N.D.	N.D.	N.D.	N.D.
p	630.477	8.15	N.D.	N.D.	N.D.	74095	71758	73782	N.D.	N.D.	N.D.	N.D.	N.D.	N.D.
p	671.501	8.15657	28593	N.D.	28578	N.D.	41093	N.D.	33953	26793	31119	N.D.	N.D.	29488
p	656.491	8.13733	N.D.	N.D.	N.D.	25237	33371	N.D.	N.D.	N.D.	N.D.	N.D.	18501	N.D.
p	651.538	8.219	N.D.	N.D.	N.D.	44807	41885	39758	N.D.	N.D.	N.D.	N.D.	N.D.	N.D.
p	637.561	8.26867	9925	N.D.	N.D.	N.D.	11119	14166	N.D.	N.D.	N.D.	N.D.	N.D.	N.D.
p	760.636	8.272	N.D.	N.D.	N.D.	13935	9638	13984	N.D.	N.D.	N.D.	N.D.	N.D.	N.D.
p	819.649	8.2985	N.D.	N.D.	N.D.	N.D.	13724	15769	N.D.	N.D.	N.D.	N.D.	N.D.	N.D.
p	604.5	8.33367	N.D.	N.D.	N.D.	N.D.	20483	17095	N.D.	N.D.	11456	N.D.	N.D.	N.D.
p	564.508	8.333	N.D.	N.D.	N.D.	15728	15422	N.D.	N.D.	N.D.	N.D.	N.D.	N.D.	N.D.
p	677.554	8.33167	N.D.	N.D.	N.D.	14146	13578	14951	N.D.	N.D.	N.D.	N.D.	N.D.	N.D.
p	772.637	8.361	N.D.	N.D.	N.D.	52956	51506	48333	N.D.	N.D.	N.D.	N.D.	N.D.	N.D.
p	648.467	8.47333	N.D.	N.D.	N.D.	81012	83496	74626	N.D.	N.D.	N.D.	N.D.	N.D.	N.D.
p	833.664	8.47433	N.D.	N.D.	N.D.	12078	10012	28672	N.D.	N.D.	N.D.	N.D.	N.D.	N.D.
p	632.493	8.457	N.D.	N.D.	N.D.	286934	263485	196978	15720	N.D.	N.D.	N.D.	N.D.	N.D.
p	522.46	8.482	N.D.	N.D.	N.D.	19511	19669	16792	N.D.	N.D.	N.D.	N.D.	N.D.	N.D.
p	354.273	8.489	N.D.	N.D.	N.D.	40475	48418	36546	N.D.	N.D.	N.D.	N.D.	N.D.	N.D.
p	674.487	8.52067	N.D.	N.D.	N.D.	48199	37588	49528	N.D.	N.D.	N.D.	N.D.	N.D.	N.D.
p	653.553	8.52233	N.D.	N.D.	N.D.	267576	273744	241927	N.D.	N.D.	N.D.	N.D.	N.D.	N.D.
p	658.508	8.5225	N.D.	N.D.	N.D.	N.D.	138888	120335	N.D.	N.D.	N.D.	N.D.	N.D.	N.D.
p	635.492	8.543	N.D.	N.D.	N.D.	26485	30661	N.D.	N.D.	N.D.	N.D.	N.D.	N.D.	N.D.
p	774.651	8.5655	N.D.	N.D.	N.D.	N.D.	19829	14025	N.D.	N.D.	N.D.	N.D.	N.D.	N.D.
p	679.568	8.596	N.D.	N.D.	N.D.	95712	91870	85894	N.D.	N.D.	N.D.	N.D.	N.D.	N.D.
p	684.521	8.59633	N.D.	N.D.	N.D.	51280	55712	54554	N.D.	N.D.	N.D.	N.D.	N.D.	N.D.
p	700.5	8.615	N.D.	N.D.	N.D.	13538	20845	N.D.	N.D.	N.D.	N.D.	N.D.	N.D.	N.D.
p	603.59	8.60933	N.D.	N.D.	N.D.	11209	9155	9292	N.D.	N.D.	N.D.	N.D.	N.D.	N.D.
p	641.553	8.64133	N.D.	N.D.	N.D.	83417	92660	83020	N.D.	N.D.	N.D.	N.D.	N.D.	N.D.
p	646.512	8.644	N.D.	N.D.	N.D.	43574	42304	N.D.	N.D.	N.D.	N.D.	N.D.	N.D.	N.D.
p	786.653	8.651	N.D.	N.D.	N.D.	98110	88610	97684	N.D.	N.D.	N.D.	N.D.	N.D.	N.D.
p	705.583	8.66367	N.D.	N.D.	N.D.	37462	36969	33737	N.D.	N.D.	N.D.	N.D.	N.D.	N.D.
p	710.539	8.659	N.D.	N.D.	N.D.	N.D.	18423	15021	N.D.	N.D.	N.D.	N.D.	N.D.	N.D.
p	667.569	8.69133	N.D.	N.D.	N.D.	51149	42362	40120	N.D.	N.D.	N.D.	N.D.	N.D.	N.D.
p	617.606	8.75567	N.D.	N.D.	N.D.	9706	9480	8539	N.D.	N.D.	N.D.	N.D.	N.D.	N.D.
p	676.498	8.81933	N.D.	N.D.	N.D.	110827	106606	97516	N.D.	N.D.	N.D.	N.D.	N.D.	N.D.
p	550.491	8.83167	N.D.	N.D.	N.D.	27695	33848	28665	N.D.	N.D.	N.D.	N.D.	N.D.	N.D.
p	382.305	8.836	N.D.	N.D.	N.D.	75296	80790	71034	N.D.	N.D.	N.D.	N.D.	N.D.	N.D.
p	686.54	8.86133	N.D.	N.D.	N.D.	226623	228356	199402	N.D.	N.D.	N.D.	N.D.	N.D.	N.D.
p	681.585	8.862	N.D.	N.D.	N.D.	565323	573705	508514	N.D.	N.D.	N.D.	N.D.	N.D.	N.D.
p	702.513	8.86133	N.D.	N.D.	N.D.	66962	63314	59285	N.D.	N.D.	N.D.	N.D.	N.D.	N.D.
p	408.321	8.879	N.D.	N.D.	N.D.	21509	21343	21890	N.D.	N.D.	N.D.	N.D.	N.D.	N.D.
p	728.528	8.89733	N.D.	N.D.	N.D.	22662	24095	22271	N.D.	N.D.	N.D.	N.D.	N.D.	N.D.
p	712.555	8.901	N.D.	N.D.	N.D.	65821	68927	61210	N.D.	N.D.	N.D.	N.D.	N.D.	N.D.
p	707.6	8.90433	N.D.	N.D.	N.D.	155648	158982	143560	N.D.	N.D.	N.D.	N.D.	N.D.	N.D.
p	631.62	8.92267	N.D.	N.D.	N.D.	8952	8687	8880	N.D.	N.D.	N.D.	N.D.	N.D.	N.D.
p	1245.32	8.93675	N.D.	N.D.	7785	7893	8447	N.D.	N.D.	N.D.	N.D.	N.D.	9658	N.D.
p	674.539	8.954	N.D.	N.D.	N.D.	33149	34394	29555	N.D.	N.D.	N.D.	N.D.	N.D.	N.D.
p	669.584	8.956	N.D.	N.D.	N.D.	93099	92869	85222	N.D.	N.D.	N.D.	N.D.	N.D.	N.D.
p	759.636	9.0285	N.D.	N.D.	N.D.	N.D.	10277	9617	N.D.	N.D.	N.D.	N.D.	N.D.	N.D.
p	704.529	9.11567	N.D.	N.D.	N.D.	64782	65907	57975	N.D.	N.D.	N.D.	N.D.	N.D.	N.D.
p	688.556	9.0992	7800	N.D.	8426	217307	222517	194417	N.D.	N.D.	N.D.	N.D.	N.D.	N.D.
p	410.336	9.12333	N.D.	N.D.	N.D.	39365	34831	35564	N.D.	N.D.	N.D.	N.D.	N.D.	N.D.
p	730.544	9.14267	N.D.	N.D.	N.D.	44165	42680	40766	N.D.	N.D.	N.D.	N.D.	N.D.	N.D.
p	709.616	9.143	N.D.	N.D.	N.D.	352672	357056	318335	N.D.	N.D.	N.D.	N.D.	N.D.	N.D.
p	740.585	9.16367	N.D.	N.D.	N.D.	30509	34829	32640	N.D.	N.D.	N.D.	N.D.	N.D.	N.D.
p	735.631	9.16567	N.D.	N.D.	N.D.	83301	85567	74551	N.D.	N.D.	N.D.	N.D.	N.D.	N.D.
p	761.645	9.21067	N.D.	N.D.	N.D.	15328	16795	13988	N.D.	N.D.	N.D.	N.D.	N.D.	N.D.
p	1352.33	9.2485	N.D.	N.D.	N.D.	39254	32041	N.D.	N.D.	N.D.	N.D.	N.D.	32703	30700
p	1355.33	9.251	N.D.	N.D.	N.D.	N.D.	10486	N.D.	N.D.	N.D.	N.D.	N.D.	10147	9997
p	723.631	9.254	N.D.	N.D.	N.D.	30896	32970	25945	N.D.	N.D.	N.D.	N.D.	N.D.	N.D.
p	814.685	9.28733	N.D.	N.D.	N.D.	44121	45970	56984	N.D.	N.D.	N.D.	N.D.	N.D.	N.D.
p	438.367	9.363	N.D.	N.D.	N.D.	22770	21225	19103	N.D.	N.D.	N.D.	N.D.	N.D.	N.D.
p	1023.29	9.36814	N.D.	N.D.	54160	N.D.	62860	65491	N.D.	65087	63085	N.D.	64756	63597
p	1020.29	9.36756	241986	N.D.	158413	217304	166348	185631	N.D.	156130	186557	N.D.	161046	156831
p	758.577	9.376	N.D.	N.D.	N.D.	28503	29449	26977	N.D.	N.D.	N.D.	N.D.	N.D.	N.D.
p	742.601	9.38033	N.D.	N.D.	N.D.	109037	108900	88500	N.D.	N.D.	N.D.	N.D.	N.D.	N.D.
p	768.618	9.40967	N.D.	N.D.	N.D.	33453	32177	28117	N.D.	N.D.	N.D.	N.D.	N.D.	N.D.
p	784.592	9.4105	N.D.	N.D.	N.D.	N.D.	15317	13248	N.D.	N.D.	N.D.	N.D.	N.D.	N.D.
p	789.677	9.451	N.D.	N.D.	N.D.	26465	24738	23488	N.D.	N.D.	N.D.	N.D.	N.D.	N.D.
p	794.633	9.454	N.D.	N.D.	N.D.	7839	8834	7151	N.D.	N.D.	N.D.	N.D.	N.D.	N.D.
p	725.647	9.45967	N.D.	N.D.	N.D.	54886	55564	53854	N.D.	N.D.	N.D.	N.D.	N.D.	N.D.
p	756.628	9.47767	N.D.	N.D.	N.D.	20717	27188	21538	N.D.	N.D.	N.D.	N.D.	N.D.	N.D.
p	815.69	9.477	N.D.	N.D.	N.D.	N.D.	14288	15291	N.D.	N.D.	N.D.	N.D.	N.D.	N.D.
p	278.222	9.51117	13180	N.D.	N.D.	N.D.	15086	N.D.	N.D.	16164	13806	N.D.	14656	13663
p	777.673	9.54375	N.D.	N.D.	N.D.	14909	18381	N.D.	7256	N.D.	8415	N.D.	N.D.	N.D.
p	744.617	9.581	N.D.	N.D.	N.D.	105106	111241	97777	7430	N.D.	N.D.	N.D.	9312	N.D.
p	760.591	9.57933	N.D.	N.D.	N.D.	20037	27765	22993	N.D.	N.D.	N.D.	N.D.	N.D.	N.D.
p	786.608	9.60533	N.D.	N.D.	N.D.	24791	27047	23924	N.D.	N.D.	N.D.	N.D.	N.D.	N.D.
p	812.622	9.644	N.D.	N.D.	N.D.	11461	10570	11644	N.D.	N.D.	N.D.	N.D.	N.D.	N.D.
p	758.631	9.681	N.D.	N.D.	N.D.	19149	21949	16293	N.D.	N.D.	N.D.	N.D.	N.D.	N.D.
p	784.647	9.71125	4718	N.D.	N.D.	12882	15995	12279	N.D.	N.D.	N.D.	N.D.	N.D.	N.D.
p	430.308	9.777	N.D.	N.D.	N.D.	N.D.	36648	31853	N.D.	30796	N.D.	N.D.	N.D.	35599
p	814.639	9.81533	N.D.	N.D.	N.D.	25316	25023	19129	N.D.	N.D.	N.D.	N.D.	N.D.	N.D.
p	840.653	9.845	N.D.	N.D.	N.D.	9273	10444	7145	N.D.	N.D.	N.D.	N.D.	N.D.	N.D.
p	786.665	9.892	N.D.	N.D.	9499	N.D.	20654	17028	N.D.	N.D.	N.D.	N.D.	N.D.	N.D.
p	1218.36	9.9126	19851	N.D.	17076	N.D.	16983	N.D.	N.D.	N.D.	18068	N.D.	N.D.	17458
p	816.651	9.99067	N.D.	N.D.	N.D.	8592	10751	8744	N.D.	N.D.	N.D.	N.D.	N.D.	N.D.
p	800.68	9.99325	11803	N.D.	N.D.	53924	56072	49093	N.D.	10252	11096	N.D.	10917	14581
p	842.668	10.0077	N.D.	N.D.	N.D.	16003	17889	12055	N.D.	N.D.	N.D.	N.D.	N.D.	N.D.
p	904.74	10.0754	50918	N.D.	84883	79916	87521	79963	N.D.	N.D.	82285	N.D.	140615	111536
p	1366.4	10.0983	N.D.	N.D.	N.D.	8933	8289	N.D.	8842	N.D.	N.D.	N.D.	N.D.	N.D.
p	866.726	10.1385	N.D.	N.D.	N.D.	N.D.	12768	24991	N.D.	N.D.	N.D.	N.D.	N.D.	N.D.
p	896.718	10.2055	17910	N.D.	15061	23760	22645	24334	15400	15977	15062	N.D.	N.D.	N.D.
p	842.724	10.2465	N.D.	N.D.	N.D.	4272	6370	N.D.	N.D.	N.D.	N.D.	N.D.	N.D.	N.D.
p	2866.75	10.2795	N.D.	N.D.	N.D.	17598	7631	N.D.	N.D.	N.D.	N.D.	N.D.	N.D.	N.D.
p	851.784	10.3537	N.D.	N.D.	51514	109387	99874	95793	N.D.	N.D.	38292	N.D.	48825	N.D.
p	877.8	10.3683	N.D.	N.D.	N.D.	239743	254757	207974	N.D.	N.D.	N.D.	N.D.	N.D.	N.D.
p	1893.5	10.3915	N.D.	N.D.	12950	10558	11380	N.D.	N.D.	N.D.	12465	N.D.	N.D.	N.D.
p	326.294	10.3867	8381	N.D.	8455	8036	8151	7805	7871	N.D.	8573	N.D.	8058	8127
p	882.755	10.394	N.D.	N.D.	N.D.	32142	31556	27948	15291	N.D.	14577	N.D.	N.D.	N.D.
p	891.814	10.4317	N.D.	N.D.	N.D.	8877	9339	7026	N.D.	N.D.	N.D.	N.D.	N.D.	N.D.
p	884.848	10.4993	5063	N.D.	12242	4291	4333	N.D.	5786	4343	4721	N.D.	6150	5487
p	134.108	10.5913	N.D.	N.D.	34901	N.D.	32830	33001	32512	31745	34211	N.D.	32229	34451
p	200.155	10.5993	N.D.	N.D.	N.D.	N.D.	9148	N.D.	N.D.	9696	8780	N.D.	N.D.	N.D.
p	228.186	10.5915	15314	N.D.	15865	N.D.	13863	14662	16126	N.D.	15506	N.D.	12397	16101
p	2342.64	10.734	N.D.	N.D.	N.D.	N.D.	17567	15525	N.D.	N.D.	N.D.	N.D.	N.D.	N.D.
p	2714.76	10.844	N.D.	N.D.	N.D.	18539	16758	N.D.	N.D.	N.D.	N.D.	N.D.	N.D.	N.D.
p	218.89	0.71425	N.D.	N.D.	N.D.	N.D.	N.D.	N.D.	N.D.	16012	14661	N.D.	9785	24630
p	548.35	0.7586	8627	N.D.	N.D.	4488	N.D.	N.D.	N.D.	11869	N.D.	N.D.	24211	9557
p	190.014	0.7785	N.D.	N.D.	N.D.	N.D.	N.D.	N.D.	N.D.	N.D.	N.D.	N.D.	10694	14905
p	328.233	0.86	N.D.	N.D.	N.D.	N.D.	N.D.	N.D.	N.D.	N.D.	N.D.	N.D.	69308	30687
p	260.123	0.8105	54026	N.D.	N.D.	N.D.	N.D.	N.D.	N.D.	68988	N.D.	N.D.	64900	88904
p	517.345	0.8205	N.D.	N.D.	N.D.	N.D.	N.D.	N.D.	N.D.	N.D.	N.D.	N.D.	50619	28200
p	280.091	0.822333	N.D.	N.D.	N.D.	N.D.	N.D.	17645	N.D.	N.D.	N.D.	N.D.	10222	12668
p	245.161	0.8635	N.D.	N.D.	N.D.	N.D.	N.D.	N.D.	N.D.	N.D.	N.D.	N.D.	22238	22421
p	286.141	0.8925	N.D.	N.D.	N.D.	32926	N.D.	39062	N.D.	N.D.	29068	N.D.	31402	N.D.
p	352.184	0.90925	25204	N.D.	21851	N.D.	N.D.	N.D.	N.D.	N.D.	39306	N.D.	28797	N.D.
p	931.646	0.928	N.D.	N.D.	N.D.	N.D.	N.D.	N.D.	N.D.	N.D.	N.D.	N.D.	8193	5619
p	906.66	0.92575	N.D.	N.D.	49098	N.D.	N.D.	N.D.	N.D.	N.D.	60760	N.D.	47768	58843
p	975.65	0.93175	N.D.	N.D.	4251	N.D.	N.D.	N.D.	N.D.	N.D.	3285	N.D.	3554	4036
p	351.232	0.9175	N.D.	N.D.	N.D.	N.D.	N.D.	N.D.	N.D.	N.D.	N.D.	N.D.	30172	24466
p	174.139	0.93475	N.D.	N.D.	12677	N.D.	N.D.	N.D.	N.D.	N.D.	30321	N.D.	18578	56386
p	370.317	0.9405	N.D.	N.D.	N.D.	N.D.	N.D.	N.D.	N.D.	N.D.	N.D.	N.D.	23991	18052
p	336.194	0.9252	28063	N.D.	N.D.	N.D.	N.D.	23766	28048	N.D.	N.D.	N.D.	17414	26826
p	560.895	0.93975	N.D.	N.D.	18592	N.D.	N.D.	N.D.	N.D.	N.D.	25759	N.D.	29330	24541
p	312.227	0.944	N.D.	N.D.	N.D.	43929	N.D.	N.D.	43058	51638	N.D.	N.D.	45148	N.D.
p	338.28	0.9464	N.D.	N.D.	9705	N.D.	N.D.	N.D.	N.D.	9507	9698	N.D.	16587	13697
p	338.245	0.944333	N.D.	N.D.	N.D.	N.D.	N.D.	N.D.	N.D.	36449	40483	N.D.	48737	N.D.
p	279.254	0.9855	N.D.	N.D.	N.D.	N.D.	N.D.	N.D.	N.D.	N.D.	N.D.	N.D.	33450	21658
p	268.192	1.9265	N.D.	N.D.	N.D.	60036	N.D.	N.D.	N.D.	31493	42277	N.D.	57938	N.D.
p	315.275	2.239	N.D.	N.D.	N.D.	N.D.	N.D.	N.D.	N.D.	N.D.	N.D.	N.D.	26513	21030
p	360.335	2.81567	N.D.	N.D.	8035	8299	N.D.	N.D.	8596	N.D.	6119	N.D.	8838	9256
p	352.256	3.13467	N.D.	N.D.	190431	88903	N.D.	N.D.	92082	103981	91391	N.D.	243530	N.D.
p	283.285	3.123	N.D.	N.D.	N.D.	N.D.	N.D.	N.D.	N.D.	N.D.	N.D.	N.D.	27739	24995
p	90.0459	4.05567	N.D.	N.D.	N.D.	N.D.	N.D.	N.D.	21625	N.D.	34921	N.D.	50036	N.D.
p	374.336	4.83257	56860	N.D.	48461	N.D.	N.D.	43873	48195	58361	46017	N.D.	49012	N.D.
p	722.129	5.07886	13504	N.D.	10569	14131	N.D.	11506	N.D.	N.D.	12282	N.D.	12692	9833
p	343.34	5.19133	N.D.	N.D.	N.D.	N.D.	N.D.	N.D.	N.D.	35308	28543	N.D.	15170	N.D.
p	710.481	5.98533	11834	N.D.	16328	N.D.	N.D.	N.D.	N.D.	N.D.	N.D.	N.D.	12412	N.D.
p	817.242	6.0015	N.D.	N.D.	N.D.	N.D.	N.D.	N.D.	N.D.	N.D.	N.D.	N.D.	15093	12422
p	552.378	6.22267	N.D.	N.D.	101909	N.D.	N.D.	N.D.	N.D.	N.D.	N.D.	N.D.	82018	93436
p	836.668	6.23133	12860	N.D.	N.D.	N.D.	N.D.	N.D.	N.D.	N.D.	N.D.	N.D.	15217	12484
p	853.508	6.322	5734	N.D.	5253	N.D.	N.D.	N.D.	5208	N.D.	N.D.	N.D.	5870	3945
p	552.378	6.38633	111540	N.D.	N.D.	N.D.	N.D.	N.D.	N.D.	N.D.	N.D.	N.D.	115189	121182
p	840.713	6.651	N.D.	N.D.	N.D.	8681	N.D.	N.D.	N.D.	N.D.	N.D.	N.D.	9389	10908
p	746.467	7.03933	N.D.	N.D.	N.D.	N.D.	N.D.	8658	N.D.	N.D.	N.D.	N.D.	8668	6388
p	608.659	7.18667	N.D.	N.D.	N.D.	N.D.	N.D.	21677	N.D.	N.D.	N.D.	N.D.	21257	15363
p	607.699	7.239	274859	N.D.	273083	263056	N.D.	N.D.	264793	251851	N.D.	N.D.	253555	N.D.
p	983.812	7.48275	895978	N.D.	N.D.	N.D.	N.D.	N.D.	N.D.	866703	970239	N.D.	1017738	N.D.
p	590.485	7.5795	N.D.	N.D.	N.D.	N.D.	N.D.	N.D.	N.D.	N.D.	N.D.	N.D.	80124	48940
p	587.486	7.6365	15739	N.D.	N.D.	N.D.	N.D.	16697	N.D.	N.D.	N.D.	N.D.	14595	20099
p	1112.32	7.6706	N.D.	N.D.	100253	N.D.	N.D.	167747	154811	150058	N.D.	N.D.	104970	N.D.
p	779.62	7.7905	N.D.	N.D.	N.D.	N.D.	N.D.	N.D.	N.D.	N.D.	N.D.	N.D.	13006	10463
p	574.491	7.895	N.D.	N.D.	N.D.	N.D.	N.D.	N.D.	N.D.	N.D.	N.D.	N.D.	45029	33876
p	1168.25	8.19763	22624	N.D.	26759	20699	N.D.	31299	55421	18425	N.D.	N.D.	26983	25745
p	879.668	8.231	N.D.	N.D.	N.D.	N.D.	N.D.	N.D.	N.D.	N.D.	N.D.	N.D.	21532	19550
p	801.502	8.3862	32940	N.D.	26952	N.D.	N.D.	N.D.	N.D.	N.D.	33261	N.D.	33209	31037
p	899.712	8.499	N.D.	N.D.	N.D.	N.D.	N.D.	N.D.	N.D.	N.D.	N.D.	N.D.	7979	5702
p	1097.29	8.50525	21811	N.D.	N.D.	20648	N.D.	24158	18764	14204	24265	N.D.	18796	20416
p	1409.39	8.62475	10874	N.D.	8352	N.D.	N.D.	N.D.	N.D.	10049	N.D.	N.D.	10977	N.D.
p	723.994	8.7275	7383	N.D.	6623	7397	N.D.	N.D.	N.D.	N.D.	N.D.	N.D.	7015	N.D.
p	831.685	8.9175	N.D.	N.D.	N.D.	N.D.	N.D.	N.D.	N.D.	N.D.	N.D.	N.D.	6360	4204
p	910.714	9.0195	N.D.	N.D.	N.D.	N.D.	N.D.	N.D.	N.D.	N.D.	N.D.	N.D.	30218	22395
p	912.731	9.191	N.D.	N.D.	N.D.	N.D.	N.D.	N.D.	N.D.	N.D.	N.D.	N.D.	14447	8856
p	1683.46	9.2185	N.D.	N.D.	N.D.	N.D.	N.D.	N.D.	N.D.	N.D.	N.D.	N.D.	6760	8858
p	912.652	9.4115	N.D.	N.D.	N.D.	N.D.	N.D.	N.D.	N.D.	N.D.	N.D.	N.D.	5704	5467
p	1042.74	10.1418	10019	N.D.	N.D.	8057	N.D.	N.D.	N.D.	N.D.	N.D.	N.D.	8451	9110
p	943.777	10.3417	7742	N.D.	8080	7788	N.D.	7835	7251	N.D.	6720	N.D.	9058	8270
p	880.742	10.5652	52604	N.D.	15027	38878	N.D.	N.D.	52601	N.D.	N.D.	N.D.	34742	61068
p	724.603	10.542	N.D.	N.D.	N.D.	N.D.	N.D.	N.D.	N.D.	N.D.	N.D.	N.D.	7640	4697
p	242.201	10.5915	32193	N.D.	N.D.	32212	N.D.	28841	33708	N.D.	33300	N.D.	35996	N.D.
p	211.23	10.593	8535	N.D.	8764	N.D.	N.D.	N.D.	N.D.	N.D.	N.D.	N.D.	8752	N.D.
p	589.414	0.9312	N.D.	N.D.	N.D.	N.D.	N.D.	38117	88258	36235	26233	N.D.	N.D.	26972
p	988.682	0.928	N.D.	N.D.	N.D.	N.D.	N.D.	N.D.	25387	8561	N.D.	N.D.	N.D.	8813
p	516.353	0.93325	N.D.	N.D.	26735	N.D.	N.D.	N.D.	N.D.	11659	10645	N.D.	N.D.	15122
p	230.163	0.94075	N.D.	N.D.	39290	N.D.	N.D.	N.D.	N.D.	43002	38413	N.D.	N.D.	50834
p	369.321	0.961	N.D.	N.D.	N.D.	N.D.	N.D.	9747	N.D.	11074	9636	N.D.	N.D.	13192
p	148.015	1.983	116557	N.D.	104014	N.D.	N.D.	N.D.	61099	111133	N.D.	N.D.	N.D.	71642
p	625.507	3.09167	68239	N.D.	52281	56974	N.D.	N.D.	63991	N.D.	28645	N.D.	N.D.	55193
p	279.254	3.16	20833	N.D.	13315	N.D.	N.D.	N.D.	N.D.	N.D.	N.D.	N.D.	N.D.	22041
p	428.23	4.50925	91402	N.D.	81747	N.D.	N.D.	N.D.	62262	N.D.	N.D.	N.D.	N.D.	74023
p	782.559	4.788	N.D.	N.D.	N.D.	N.D.	N.D.	N.D.	N.D.	17918	15227	N.D.	N.D.	14316
p	463.363	4.96533	N.D.	N.D.	N.D.	56801	N.D.	43470	N.D.	N.D.	N.D.	N.D.	N.D.	54842
p	923.253	6.95975	497633	N.D.	N.D.	N.D.	N.D.	N.D.	612962	696457	N.D.	N.D.	N.D.	593283
p	778.762	7.71783	5990	N.D.	6829	5851	N.D.	N.D.	N.D.	6471	7325	N.D.	N.D.	6024
p	790.536	7.86933	N.D.	N.D.	31833	N.D.	N.D.	20121	23033	15853	25169	N.D.	N.D.	29552
p	1226.29	8.19467	35099	N.D.	32404	N.D.	N.D.	N.D.	N.D.	N.D.	N.D.	N.D.	N.D.	34829
p	1060.26	9.5486	8062	N.D.	N.D.	7033	N.D.	N.D.	4744	N.D.	10214	N.D.	N.D.	6198
p	555.522	10.1724	N.D.	N.D.	9708	9901	N.D.	N.D.	10442	N.D.	11687	N.D.	N.D.	11870
p	323.836	0.7084	N.D.	N.D.	70169	N.D.	N.D.	70162	19505	24266	86202	N.D.	N.D.	N.D.
p	272.124	0.8145	N.D.	N.D.	N.D.	N.D.	N.D.	N.D.	N.D.	45279	46876	N.D.	N.D.	N.D.
p	326.13	0.898	N.D.	N.D.	N.D.	N.D.	N.D.	26623	21653	32763	28388	N.D.	N.D.	N.D.
p	314.171	0.898	N.D.	N.D.	N.D.	N.D.	N.D.	N.D.	N.D.	61208	38667	N.D.	N.D.	N.D.
p	224.13	0.89325	N.D.	N.D.	N.D.	N.D.	N.D.	178609	117961	55329	168064	N.D.	N.D.	N.D.
p	203.132	0.9355	N.D.	N.D.	60023	N.D.	N.D.	26177	N.D.	45579	49612	N.D.	N.D.	N.D.
p	532.331	0.932333	N.D.	N.D.	N.D.	19437	N.D.	N.D.	27397	23540	N.D.	N.D.	N.D.	N.D.
p	435.243	0.934	N.D.	N.D.	N.D.	N.D.	N.D.	N.D.	N.D.	15022	13272	N.D.	N.D.	N.D.
p	233.142	0.946	N.D.	N.D.	N.D.	11930	N.D.	N.D.	N.D.	19358	20175	N.D.	N.D.	N.D.
p	278.185	0.9465	22558	N.D.	N.D.	N.D.	N.D.	26923	25419	23681	N.D.	N.D.	N.D.	N.D.
p	218.167	0.946	N.D.	N.D.	N.D.	N.D.	N.D.	N.D.	N.D.	11766	41116	N.D.	N.D.	N.D.
p	278.15	1.627	156951	N.D.	109714	N.D.	N.D.	N.D.	N.D.	122794	N.D.	N.D.	N.D.	N.D.
p	1276	4.0525	N.D.	N.D.	N.D.	N.D.	N.D.	N.D.	N.D.	80482	88178	N.D.	N.D.	N.D.
p	367.143	5.71925	N.D.	N.D.	14533	N.D.	N.D.	15430	N.D.	12846	13054	N.D.	N.D.	N.D.
p	701.7	6.0175	N.D.	N.D.	N.D.	N.D.	N.D.	N.D.	23425	24773	N.D.	N.D.	N.D.	N.D.
p	724.639	6.854	N.D.	N.D.	N.D.	N.D.	N.D.	N.D.	N.D.	13485	13310	N.D.	N.D.	N.D.
p	945.184	6.929	N.D.	N.D.	N.D.	23878	N.D.	N.D.	22251	26213	N.D.	N.D.	N.D.	N.D.
p	264.265	7.203	20022	N.D.	50305	N.D.	N.D.	64681	N.D.	75452	74629	N.D.	N.D.	N.D.
p	1171.26	8.2025	6254	N.D.	N.D.	7946	N.D.	N.D.	15120	7424	N.D.	N.D.	N.D.	N.D.
p	1424.37	10.1433	N.D.	N.D.	N.D.	N.D.	N.D.	158340	N.D.	155932	163511	N.D.	N.D.	N.D.
p	922.73	10.2137	19426	N.D.	N.D.	N.D.	N.D.	N.D.	19186	20391	N.D.	N.D.	N.D.	N.D.
p	908.852	10.6457	N.D.	N.D.	N.D.	N.D.	N.D.	8043	7702	5263	N.D.	N.D.	N.D.	N.D.
p	292.998	0.678	N.D.	N.D.	34957	25815	N.D.	29718	N.D.	N.D.	N.D.	N.D.	N.D.	N.D.
p	458.207	0.908	N.D.	N.D.	N.D.	17935	N.D.	29108	N.D.	N.D.	N.D.	N.D.	N.D.	N.D.
p	364.185	0.924333	N.D.	N.D.	N.D.	N.D.	N.D.	26784	28355	N.D.	25929	N.D.	N.D.	N.D.
p	276.17	0.963	N.D.	N.D.	N.D.	26990	N.D.	48373	25117	N.D.	N.D.	N.D.	N.D.	N.D.
p	587.134	2.77067	24105	N.D.	N.D.	35906	N.D.	35664	N.D.	N.D.	N.D.	N.D.	N.D.	N.D.
p	913.183	7.88233	5553	N.D.	6077	N.D.	N.D.	7081	N.D.	N.D.	N.D.	N.D.	N.D.	N.D.
p	1113.27	7.96033	N.D.	N.D.	N.D.	21473	N.D.	16826	N.D.	N.D.	16633	N.D.	N.D.	N.D.
p	1189.33	7.976	N.D.	N.D.	N.D.	42254	N.D.	42949	N.D.	N.D.	N.D.	N.D.	N.D.	N.D.
p	805.63	8.0535	N.D.	N.D.	N.D.	10781	N.D.	8407	N.D.	N.D.	N.D.	N.D.	N.D.	N.D.
p	966.3	8.1245	N.D.	N.D.	N.D.	16231	N.D.	16281	N.D.	N.D.	N.D.	N.D.	N.D.	N.D.
p	849.658	8.36067	N.D.	N.D.	N.D.	11293	N.D.	37380	38183	N.D.	N.D.	N.D.	N.D.	N.D.
p	733.615	8.961	N.D.	N.D.	N.D.	21436	N.D.	21666	N.D.	N.D.	N.D.	N.D.	N.D.	N.D.
p	695.6	8.9945	N.D.	N.D.	N.D.	46762	N.D.	45910	N.D.	N.D.	N.D.	N.D.	N.D.	N.D.
p	788.621	9.7965	N.D.	N.D.	N.D.	14367	N.D.	11803	N.D.	N.D.	N.D.	N.D.	N.D.	N.D.
p	68.0615	10.577	N.D.	N.D.	N.D.	7872	N.D.	5784	N.D.	N.D.	N.D.	N.D.	N.D.	N.D.
p	2640.74	10.822	N.D.	N.D.	N.D.	18479	N.D.	20891	N.D.	N.D.	20428	N.D.	N.D.	N.D.
p	369.913	0.680667	N.D.	N.D.	22906	N.D.	N.D.	N.D.	21101	N.D.	16895	N.D.	N.D.	N.D.
p	719.506	1.0045	14638	N.D.	54350	N.D.	N.D.	N.D.	N.D.	N.D.	N.D.	N.D.	N.D.	N.D.
p	271.047	2.638	N.D.	N.D.	7900	N.D.	N.D.	N.D.	10900	N.D.	8166	N.D.	N.D.	N.D.
p	235.153	4.259	16527	N.D.	16774	N.D.	N.D.	N.D.	N.D.	N.D.	N.D.	N.D.	N.D.	N.D.
p	660.096	4.768	19950	N.D.	27757	N.D.	N.D.	N.D.	N.D.	N.D.	N.D.	N.D.	N.D.	N.D.
p	743.489	5.174	78307	N.D.	101375	N.D.	N.D.	N.D.	N.D.	N.D.	N.D.	N.D.	N.D.	N.D.
p	419.393	5.68	10323	N.D.	9251	N.D.	N.D.	N.D.	N.D.	N.D.	N.D.	N.D.	N.D.	N.D.
p	813.683	6.263	208032	N.D.	200185	N.D.	N.D.	N.D.	343289	N.D.	N.D.	N.D.	N.D.	N.D.
p	797.514	6.365	13342	N.D.	11964	N.D.	N.D.	N.D.	14358	N.D.	N.D.	N.D.	N.D.	N.D.
p	813.684	6.395	251235	N.D.	326081	N.D.	N.D.	N.D.	N.D.	N.D.	N.D.	N.D.	N.D.	N.D.
p	872.165	6.541	6247	N.D.	10093	N.D.	N.D.	N.D.	N.D.	N.D.	N.D.	N.D.	N.D.	N.D.
p	889.218	6.9415	28374	N.D.	29478	N.D.	N.D.	N.D.	N.D.	N.D.	N.D.	N.D.	N.D.	N.D.
p	593.473	6.9495	67570	N.D.	57817	N.D.	N.D.	N.D.	N.D.	N.D.	N.D.	N.D.	N.D.	N.D.
p	966.278	6.9475	82005	N.D.	62780	N.D.	N.D.	N.D.	N.D.	N.D.	N.D.	N.D.	N.D.	N.D.
p	573.704	7.1885	23327	N.D.	25217	N.D.	N.D.	N.D.	8783	N.D.	23544	N.D.	N.D.	N.D.
p	568.7	7.1405	51533	N.D.	282043	N.D.	N.D.	N.D.	N.D.	N.D.	N.D.	N.D.	N.D.	N.D.
p	784.658	7.253	28277	N.D.	31554	N.D.	N.D.	N.D.	N.D.	N.D.	N.D.	N.D.	N.D.	N.D.
p	1023.22	7.6685	5510	N.D.	5813	N.D.	N.D.	N.D.	N.D.	N.D.	N.D.	N.D.	N.D.	N.D.
p	854.724	10.588	16545	N.D.	15182	N.D.	N.D.	N.D.	N.D.	N.D.	N.D.	N.D.	N.D.	N.D.
p	238.152	0.937	N.D.	N.D.	N.D.	N.D.	N.D.	N.D.	26350	N.D.	52803	N.D.	N.D.	N.D.
p	406.231	0.939667	11582	N.D.	N.D.	N.D.	N.D.	N.D.	15409	N.D.	19088	N.D.	N.D.	N.D.
p	377.211	3.9985	N.D.	N.D.	N.D.	N.D.	N.D.	N.D.	62052	N.D.	61826	N.D.	N.D.	N.D.
p	535.476	5.909	N.D.	N.D.	N.D.	N.D.	N.D.	N.D.	10901	N.D.	10038	N.D.	N.D.	N.D.
n	304.769	0.771778	67915	94350	51579	49595	N.D.	44604	N.D.	57439	89648	82481	58474	N.D.
n	382.737	0.737667	85915	72459	N.D.	51896	N.D.	N.D.	83021	N.D.	100815	N.D.	N.D.	87833
n	293.805	0.7495	342557	304661	322267	252868	270001	262832	327580	287327	447811	240012	190370	333638
n	188.014	0.7505	25293	N.D.	23792	16394	N.D.	N.D.	N.D.	N.D.	71415	N.D.	N.D.	N.D.
n	290.079	0.775	N.D.	N.D.	N.D.	N.D.	N.D.	N.D.	N.D.	N.D.	25117	N.D.	6881	N.D.
n	204.874	0.757	1825520	1627741	1718828	1012521	N.D.	459032	1625591	1262808	1851396	1667561	1229033	1186175
n	128.046	0.815167	N.D.	N.D.	N.D.	N.D.	20828	N.D.	12256	11494	24538	14363	15725	N.D.
n	218.112	0.8365	9701	N.D.	N.D.	N.D.	N.D.	N.D.	6699	9790	12891	N.D.	N.D.	N.D.
n	405.243	0.817667	6814	N.D.	N.D.	N.D.	N.D.	N.D.	N.D.	N.D.	8422	17865	N.D.	N.D.
n	142.022	0.8275	252978	128015	166287	N.D.	N.D.	N.D.	111085	130315	343673	153192	116543	N.D.
n	272.126	0.8372	N.D.	N.D.	N.D.	11682	N.D.	21252	21890	N.D.	30840	13347	N.D.	N.D.
n	172.107	0.828	N.D.	16730	N.D.	22463	26555	20439	N.D.	N.D.	23487	17808	18936	N.D.
n	202.084	0.8334	N.D.	5114	6448	N.D.	N.D.	N.D.	N.D.	N.D.	11960	7649	N.D.	6482
n	258.108	0.843333	14680	8733	15140	10931	N.D.	N.D.	11745	10577	29131	19695	14887	N.D.
n	240.099	0.83525	16486	16207	N.D.	N.D.	17205	16792	12880	19346	30402	20550	N.D.	N.D.
n	242.112	0.838727	N.D.	9523	14618	19302	20100	20266	16729	19341	32685	22454	24465	20928
n	156.076	0.865889	31898	28746	37299	N.D.	38848	N.D.	33119	N.D.	41694	41395	24551	25640
n	295.804	0.836	N.D.	N.D.	N.D.	102519	120430	N.D.	N.D.	N.D.	171001	N.D.	212180	N.D.
n	244.128	0.873667	9978	8375	N.D.	N.D.	N.D.	N.D.	9201	26751	21692	N.D.	N.D.	9016
n	124.052	0.87	N.D.	N.D.	N.D.	N.D.	N.D.	9835	13319	12653	14223	N.D.	N.D.	N.D.
n	260.161	0.858	N.D.	N.D.	N.D.	N.D.	N.D.	N.D.	N.D.	N.D.	10643	6181	N.D.	N.D.
n	258.143	0.8676	N.D.	N.D.	N.D.	N.D.	N.D.	19478	14021	N.D.	15820	21345	N.D.	15896
n	213.839	0.874364	N.D.	256352	199867	207137	214618	201066	214986	214108	321615	253110	209841	277935
n	390.187	0.8948	10864	N.D.	N.D.	15074	N.D.	12967	N.D.	N.D.	10601	N.D.	11912	N.D.
n	300.157	0.8912	26016	N.D.	N.D.	26264	N.D.	N.D.	19385	N.D.	38035	N.D.	N.D.	17409
n	374.191	0.893455	13421	10600	N.D.	11937	11808	10110	23552	25625	14146	9975	8828	11008
n	186.123	0.887667	9855	8606	14114	15583	N.D.	N.D.	12288	N.D.	20989	N.D.	N.D.	N.D.
n	114.066	0.890727	23418	17536	22834	32520	32968	28349	25407	28468	30835	31391	N.D.	21535
n	358.195	0.9156	18215	N.D.	31442	31940	11001	26591	31069	35257	21104	N.D.	28859	15272
n	226.118	0.880333	N.D.	10933	N.D.	9862	13915	12954	8298	N.D.	18621	N.D.	N.D.	N.D.
n	372.213	0.9145	N.D.	N.D.	N.D.	N.D.	N.D.	N.D.	N.D.	N.D.	21059	20040	N.D.	N.D.
n	154.098	0.919667	N.D.	N.D.	N.D.	N.D.	N.D.	N.D.	N.D.	32389	20735	N.D.	21223	N.D.
n	224.141	0.924667	15667	N.D.	N.D.	N.D.	N.D.	N.D.	N.D.	N.D.	23398	N.D.	21627	N.D.
n	200.082	0.919333	9578	N.D.	N.D.	N.D.	N.D.	9877	7648	19749	14775	N.D.	N.D.	10388
n	344.228	0.933	7009	N.D.	21824	N.D.	N.D.	N.D.	N.D.	N.D.	8517	N.D.	N.D.	N.D.
n	462.242	0.932	N.D.	N.D.	N.D.	N.D.	N.D.	N.D.	N.D.	5536	6820	N.D.	8150	6267
n	255.916	0.925818	663295	238045	563327	601816	N.D.	547113	593756	576993	749292	562756	555872	568734
n	430.214	0.923333	N.D.	N.D.	N.D.	N.D.	N.D.	N.D.	9922	N.D.	10861	N.D.	N.D.	11868
n	418.229	0.929286	20118	116185	N.D.	17529	25198	N.D.	N.D.	N.D.	32011	25685	N.D.	23986
n	256.201	0.9343	42622	27822	36143	41510	35433	31646	N.D.	39346	47971	N.D.	38226	38785
n	272.197	0.9348	N.D.	N.D.	N.D.	11154	N.D.	8777	7526	10300	12794	N.D.	N.D.	N.D.
n	667.061	0.928727	16137	35000000	N.D.	81885	26482	18138	12061	43708	31097	24173	26358	34709
n	240.133	0.928091	39146	32549	55112	47693	22138	27061	26188	35997	46644	43856	N.D.	40347
n	244.165	0.923857	9503	8609	N.D.	N.D.	15682	15635	N.D.	10101	15508	N.D.	14324	N.D.
n	515.322	0.929333	27780	13644	26004	32751	36580	31315	23676	22743	31501	25253	24845	22345
n	226.154	0.9335	55410	N.D.	N.D.	51114	N.D.	42205	38986	45785	56414	N.D.	17810	46655
n	340.203	0.930727	95164	154147	109755	138225	100365	86437	111738	N.D.	129829	135601	114935	108254
n	214.154	0.929273	45546	33785	41094	50037	51225	N.D.	44582	60581	70771	64246	63124	46418
n	222.159	0.933833	103352	66359	157941	115107	55069	52486	66680	90313	28300	116371	174124	115276
n	242.185	0.933091	19272	9666	20043	17998	15153	18544	20728	22275	23241	17687	16389	N.D.
n	237.109	0.9325	92896	61196	147374	108456	51146	49750	60257	83243	36925	113684	157777	101432
n	270.216	0.933909	33174	27238	29759	32749	N.D.	29510	41828	51692	42177	37137	40504	48945
n	326.188	0.93125	210597	895682	185712	287037	259556	210528	248950	324708	241158	280205	242854	248798
n	278.188	0.935	88292	50316	79297	90051	50836	49615	46789	72290	53126	204268	56427	62215
n	294.18	0.932545	796587	444890	999699	899795	382441	N.D.	452746	631386	1082047	832731	1065937	744603
n	474.286	0.934	46167	13969	36497	38619	35946	N.D.	N.D.	N.D.	40114	N.D.	38412	N.D.
n	296.231	0.938167	20488	13877	16353	17206	17500	16593	33273	30691	21548	19144	18680	29474
n	328.222	0.926	N.D.	N.D.	N.D.	N.D.	N.D.	N.D.	N.D.	N.D.	21238	N.D.	14669	N.D.
n	168.98	0.9344	38164	N.D.	30755	34887	30107	32585	35394	N.D.	31491	32783	33335	33731
n	342.204	0.933555	10961	N.D.	15088	22376	N.D.	22233	17772	N.D.	13643	21937	25393	22009
n	426.26	0.9343	41545	15226	29887	38234	23509	25886	24300	28682	15078	22964	N.D.	N.D.
n	284.196	0.935667	15217	15819	30388	36103	23495	22741	15255	28217	16739	20166	33794	21620
n	314.241	0.938667	17656	N.D.	18334	18537	17084	15290	21331	N.D.	24206	19355	N.D.	24460
n	272.231	0.935182	31323	19908	24038	13510	12966	11857	13011	N.D.	19364	14413	13461	13738
n	398.232	0.9343	55219	47435	40700	50455	42966	30173	32829	N.D.	46851	32187	N.D.	25814
n	250.155	0.933222	255580	N.D.	190848	339512	178338	N.D.	68244	257954	179900	255080	258419	N.D.
n	490.28	0.933	54398	17339	49993	50789	46604	47662	44139	44750	57587	47000	51586	47349
n	158.128	0.935167	63933	116248	122324	108111	50959	65992	72306	83984	130827	149783	93496	113832
n	326.245	0.9355	9108	N.D.	11679	N.D.	N.D.	10413	N.D.	N.D.	21068	N.D.	N.D.	N.D.
n	322.215	0.934667	70813	11774	56305	71186	14773	50362	38103	64640	52247	20732	19380	57770
n	743.549	0.9486	N.D.	N.D.	5186	6906	N.D.	5801	N.D.	N.D.	5964	N.D.	N.D.	5918
n	306.219	0.937091	23835	10088	21121	13166	17308	34133	17732	N.D.	17954	119680	9010	23261
n	266.152	0.935833	166278	148724	97220	217772	90611	108864	76554	164631	91845	121608	105414	125508
n	354.207	0.934454	66564	50038	43473	83705	31877	46171	42991	76462	38922	46841	N.D.	46618
n	286.209	0.93725	23993	16034	12736	22493	17284	25117	21369	14733	29933	23404	25170	19766
n	422.235	0.935556	N.D.	16225	10223	17585	17051	N.D.	N.D.	14428	18546	17785	16629	15636
n	144.113	0.938083	58115	71145	52596	52837	38645	67523	71346	54425	215459	74174	49940	107125
n	349.262	0.939833	173110	103163	150070	159501	154485	153097	155264	157429	216527	151458	146306	155295
n	384.286	0.939333	N.D.	N.D.	N.D.	N.D.	21073	N.D.	N.D.	N.D.	29073	N.D.	24919	N.D.
n	379.24	0.9384	N.D.	N.D.	9522	13925	11873	N.D.	N.D.	N.D.	13961	N.D.	N.D.	8177
n	407.277	0.93775	16011	N.D.	N.D.	15283	N.D.	N.D.	N.D.	N.D.	16450	N.D.	13845	N.D.
n	166.984	0.935083	477661	206817	428186	450329	403645	390979	438186	419276	380622	429741	428696	426439
n	284.233	0.9394	N.D.	N.D.	10270	12652	8795	N.D.	N.D.	N.D.	15992	N.D.	N.D.	11447
n	328.257	0.939444	13724	N.D.	15491	12539	13876	N.D.	11878	N.D.	19542	14076	13010	12108
n	438.248	0.935143	11562	N.D.	11984	N.D.	29276	13045	10601	N.D.	14413	N.D.	N.D.	10832
n	254.185	0.93825	N.D.	N.D.	17680	N.D.	N.D.	N.D.	N.D.	N.D.	19838	15176	N.D.	18049
n	354.276	0.942714	N.D.	N.D.	N.D.	10603	N.D.	8260	10087	4789	12640	4546	N.D.	6974
n	258.181	0.928667	N.D.	N.D.	N.D.	N.D.	9406	11633	N.D.	14297	10444	9091	11975	N.D.
n	312.265	0.945	N.D.	N.D.	7335	N.D.	N.D.	N.D.	8153	N.D.	10948	N.D.	8856	N.D.
n	365.257	0.938417	52998	33333	43599	39529	41221	53797	38242	15775	51311	20731	39860	23571
n	470.287	0.937	16378	N.D.	N.D.	N.D.	N.D.	N.D.	N.D.	11639	9988	N.D.	N.D.	10626
n	300.262	0.941818	33661	22271	N.D.	20706	17862	18666	19703	19357	23042	19301	18177	19016
n	280.168	0.937556	24113	21743	N.D.	N.D.	12229	25053	14917	31648	13562	21207	N.D.	36631
n	342.273	0.9425	9973	N.D.	9501	11955	10848	N.D.	9143	10118	13297	10767	8405	10160
n	318.143	0.939	N.D.	N.D.	22215	19365	N.D.	N.D.	12617	N.D.	17630	12796	24011	N.D.
n	356.288	0.94325	9860	N.D.	9733	10397	N.D.	N.D.	8814	10656	13126	11641	N.D.	11189
n	368.288	0.951375	9608	98821	10293	8454	8330	13894	8311	N.D.	10025	N.D.	N.D.	N.D.
n	170.128	0.93975	N.D.	N.D.	N.D.	27635	N.D.	N.D.	N.D.	22584	25978	N.D.	N.D.	19144
n	397.246	0.940167	11009	N.D.	N.D.	N.D.	N.D.	17752	16524	N.D.	16434	22244	13116	N.D.
n	212.139	0.957857	N.D.	N.D.	N.D.	16796	N.D.	22130	11898	N.D.	22815	18439	21275	39624
n	298.247	0.95625	66633	49706	55494	63407	59273	57257	61835	59475	72942	61059	57661	61344
n	426.334	0.9525	5607	N.D.	N.D.	N.D.	N.D.	N.D.	5426	N.D.	8205	5863	N.D.	N.D.
n	398.328	0.953333	N.D.	N.D.	N.D.	9303	7101	N.D.	N.D.	N.D.	7620	N.D.	N.D.	N.D.
n	434.338	0.959833	N.D.	N.D.	N.D.	6815	N.D.	N.D.	5631	5153	7091	N.D.	4433	4773
n	300.191	0.94025	12689	N.D.	14698	13343	N.D.	17621	12551	19241	19339	14124	N.D.	N.D.
n	186.159	0.969286	N.D.	N.D.	N.D.	9681	N.D.	7692	N.D.	8459	11550	10983	7828	13771
n	370.302	0.961556	11455	N.D.	10716	18219	10616	18058	16122	10366	11622	N.D.	10409	N.D.
n	240.163	0.974714	N.D.	N.D.	N.D.	15658	31457	14097	15737	N.D.	21513	17951	13287	N.D.
n	228.206	0.994333	124735	82454	102087	109182	104006	94276	111079	110341	151833	108588	96041	90598
n	744.201	1.00125	N.D.	N.D.	N.D.	158123	167459	159382	147647	176399	189838	159855	163413	N.D.
n	791.704	0.997667	210669	N.D.	67655	N.D.	N.D.	N.D.	N.D.	76715	126644	34726	N.D.	50066
n	360.332	0.9924	16026	N.D.	N.D.	21926	N.D.	N.D.	N.D.	N.D.	22177	N.D.	29317	15620
n	616.182	1.00478	160957	N.D.	N.D.	155396	N.D.	154334	151886	169723	196447	141097	154145	137237
n	280.237	1.01788	27769	N.D.	N.D.	27695	N.D.	N.D.	25625	20573	28587	21683	22078	22391
n	200.175	1.0328	N.D.	23311	N.D.	25244	N.D.	N.D.	19571	N.D.	32101	33076	N.D.	N.D.
n	349.263	1.7112	N.D.	42154	52982	54262	51011	48888	50148	49799	73675	50186	N.D.	52745
n	489.305	2.09567	N.D.	N.D.	N.D.	N.D.	7614	6727	N.D.	N.D.	7027	N.D.	N.D.	N.D.
n	515.324	2.2285	N.D.	N.D.	N.D.	8900	8452	8635	N.D.	N.D.	6371	N.D.	N.D.	N.D.
n	507.235	2.34962	N.D.	N.D.	44326	49539	39666	N.D.	40122	45795	66662	38526	39982	N.D.
n	333.268	2.35117	2974261	2142883	2564065	2523105	2444040	2186401	2517240	2442770	3110801	2220382	2318366	2601497
n	415.27	2.3605	N.D.	62560	60701	55195	58972	66480	69621	57236	69260	N.D.	N.D.	N.D.
n	300.205	2.626	119535	155305	109450	114136	81059	92338	98794	100192	108398	100405	100657	104362
n	360.336	2.8068	11045	10508	N.D.	N.D.	N.D.	N.D.	N.D.	N.D.	15410	9046	8711	N.D.
n	507.232	2.812	71998	55739	52301	59178	52544	54476	65436	53269	91992	63262	58945	56063
n	415.27	2.80991	59413	63828	65707	56851	63026	50613	53359	65349	76190	64587	N.D.	50095
n	333.268	2.81517	3034705	3123736	3184197	2957035	2735880	2926729	3080280	3153909	3827503	3330994	3205035	3007034
n	289.28	2.81311	26405	23397	23189	24973	N.D.	22841	23778	24160	17447	N.D.	N.D.	23438
n	306.325	2.85275	5972	N.D.	4809	N.D.	N.D.	N.D.	N.D.	N.D.	8537	N.D.	N.D.	4291
n	395.327	3.0468	29674	N.D.	33738	N.D.	36183	N.D.	N.D.	58044	76119	N.D.	N.D.	N.D.
n	302.221	3.19071	40338	314282	N.D.	88674	59087	N.D.	N.D.	N.D.	41953	67058	57296	N.D.
n	809.533	2.96444	37806	N.D.	34562	28551	32046	N.D.	19111	35548	35668	37634	31094	N.D.
n	489.373	3.2532	7625	N.D.	N.D.	N.D.	N.D.	N.D.	N.D.	8444	6896	25351	7718	N.D.
n	406.225	3.43283	17438	18493	15430	15510	17830	18488	15621	15463	18900	17383	14740	14527
n	302.221	3.44029	85043	100605	N.D.	N.D.	28095	77840	31504	N.D.	42649	30460	N.D.	N.D.
n	378.276	3.779	262145	194014	217314	204318	184812	170394	199455	194782	220721	227279	52879	192704
n	395.322	3.74283	54816	46747	55371	53945	54308	50741	49285	45293	85546	49718	43227	48367
n	588.509	3.73425	174936	183855	126922	117874	96911	91465	132140	120590	189061	130148	126156	137505
n	390.294	3.75642	189607	102996	139154	64570	64570	52524	74107	77935	196701	171877	136048	76641
n	392.293	3.77067	8095068	6846937	6921176	7371401	6712541	6820620	7237740	6775652	9392428	6642983	6759676	6668903
n	332.271	3.77133	3703908	3086043	3432956	3330006	3076418	2777165	3322154	3203592	4327234	3452108	3285490	3249693
n	646.532	3.77355	180689	135482	150819	132752	N.D.	133461	161438	142710	138195	162947	149003	107278
n	617.544	3.82371	42945	N.D.	34116	N.D.	N.D.	N.D.	31523	28550	30764	39182	27788	N.D.
n	614.524	3.82067	N.D.	113423	33177	N.D.	N.D.	N.D.	23350	N.D.	38839	27110	N.D.	108443
n	636.512	3.82075	N.D.	N.D.	8286	N.D.	N.D.	N.D.	7171	N.D.	10440	7713	N.D.	N.D.
n	418.325	4.1813	273082	154116	247900	95225	N.D.	N.D.	139760	154859	297283	195503	175236	127141
n	243.18	4.20864	19025	18581	19947	17975	18281	17131	N.D.	12389	12271	9840	20689	9834
n	488.273	4.28829	N.D.	N.D.	N.D.	19888	69821	56362	74929	N.D.	96487	N.D.	74595	66667
n	515.291	4.3178	43894	N.D.	N.D.	27989	N.D.	N.D.	35024	29211	42551	N.D.	N.D.	N.D.
n	418.325	4.66008	335560	204145	222764	103868	107227	92090	146617	155958	289018	249412	160960	183045
n	308.214	4.70033	N.D.	30634	15907	30511	N.D.	19506	23694	18837	18740	N.D.	15641	18216
n	720.151	5.08237	39295	N.D.	N.D.	38653	32258	33967	32488	N.D.	43966	36092	N.D.	32473
n	713.538	5.144	N.D.	N.D.	N.D.	N.D.	N.D.	N.D.	N.D.	N.D.	117915	130576	N.D.	N.D.
n	370.961	5.269	55697	N.D.	N.D.	40547	N.D.	N.D.	58511	19035	235249	31111	N.D.	N.D.
n	598.397	5.409	N.D.	N.D.	N.D.	N.D.	N.D.	N.D.	N.D.	N.D.	21075	17969	12542	N.D.
n	337.33	5.44	10766	N.D.	6794	N.D.	N.D.	N.D.	N.D.	N.D.	9913	N.D.	21424	N.D.
n	374.317	5.492	139712	143172	123760	97284	N.D.	128894	136295	132749	170032	130824	160684	135016
n	434.338	5.50142	846634	604991	598433	597508	537232	544093	552714	576270	761597	580982	654946	611535
n	914.585	5.574	13478	N.D.	N.D.	N.D.	N.D.	15672	N.D.	N.D.	23221	8079	N.D.	N.D.
n	916.602	5.67925	54823	45373	17291	65615	49547	71434	64013	59416	78279	55099	60202	52786
n	576.437	5.687	N.D.	N.D.	N.D.	N.D.	N.D.	N.D.	N.D.	N.D.	366692	339870	N.D.	N.D.
n	615.414	5.689	N.D.	N.D.	N.D.	N.D.	N.D.	N.D.	N.D.	N.D.	24524	N.D.	21711	N.D.
n	796.166	5.9166	N.D.	N.D.	30743	35789	N.D.	N.D.	N.D.	25996	33755	33526	N.D.	N.D.
n	834.523	5.79967	N.D.	N.D.	N.D.	N.D.	N.D.	N.D.	N.D.	N.D.	8492	8400	5950	N.D.
n	580.42	5.8572	N.D.	N.D.	163456	N.D.	N.D.	13414	N.D.	N.D.	21540	13004	16292	N.D.
n	614.427	5.92333	N.D.	N.D.	N.D.	N.D.	N.D.	N.D.	N.D.	N.D.	10397	9111	7642	N.D.
n	326.317	5.956	N.D.	N.D.	N.D.	N.D.	N.D.	N.D.	N.D.	N.D.	13945	11508	N.D.	N.D.
n	794.17	5.92145	55735	58980	21085	41969	58861	53600	69054	N.D.	80841	51908	53656	51110
n	565.346	6.10092	13007	13647	9857	11400	10159	11109	10102	12216	15856	11048	13748	10775
n	866.724	6.12145	87401	58268	78619	N.D.	59801	52768	82874	75448	91092	84308	63170	73541
n	793.775	6.22	11184	12586	9891	16298	18854	16810	N.D.	10498	16934	N.D.	10548	14901
n	582.434	6.2192	49747	N.D.	N.D.	15334	25180	26267	12622	13754	13836	10915	13860	16937
n	713.541	6.24233	N.D.	N.D.	N.D.	N.D.	N.D.	N.D.	N.D.	N.D.	174415	137285	125687	N.D.
n	727.536	6.23767	18474	11132	16343	10445	10279	10056	14433	13877	21258	15876	14323	14498
n	776.536	6.249	N.D.	N.D.	N.D.	N.D.	N.D.	N.D.	N.D.	N.D.	34603	29673	25991	N.D.
n	864.812	6.25718	N.D.	6982	6596	11290	13731	11517	6942	8024	12504	7222	8589	8358
n	363.346	6.29033	53644	41158	54427	37275	38747	36886	48848	50424	56293	49623	45198	46966
n	656.426	6.28375	10658	N.D.	7621	N.D.	N.D.	N.D.	N.D.	N.D.	12393	8331	N.D.	N.D.
n	524.406	6.299	7613	N.D.	N.D.	N.D.	N.D.	N.D.	N.D.	N.D.	7156	5616	N.D.	N.D.
n	340.33	6.3182	28084	N.D.	24561	31004	22849	18509	33478	25401	180073	99472	N.D.	24761
n	753.552	6.32367	3613481	2329804	3465517	1973148	1846582	1848443	2839526	2970085	3500235	3123755	2861891	2733508
n	835.553	6.32892	29964	31970	24101	38280	35446	35871	27790	28267	37968	25827	29956	30402
n	791.701	6.35191	3500941	1342805	3428270	347636	N.D.	328252	2198532	2483948	2587841	2827304	2132705	1843120
n	813.683	6.37436	N.D.	151619	277122	50340	44426	47594	216510	224033	249982	138453	209238	179822
n	587.465	6.5525	N.D.	N.D.	N.D.	N.D.	N.D.	N.D.	N.D.	N.D.	18222	13780	N.D.	N.D.
n	957.784	6.67162	N.D.	N.D.	6283	7728	6815	N.D.	6961	6172	9554	6569	6576	N.D.
n	793.776	6.66967	1576145	1167833	1382428	1327943	1522344	1402123	1230132	1285899	1887155	1215715	1194695	1430053
n	719.739	6.67217	128774	103349	121269	112848	126788	124026	110876	117249	143424	104263	86478	125550
n	853.707	6.6738	10273	N.D.	N.D.	N.D.	N.D.	10795	7870	N.D.	11986	N.D.	9013	N.D.
n	718.736	6.67525	23629	20745	23050	22065	25424	24733	20795	22561	28895	19516	20610	23732
n	875.777	6.67667	93054	77203	82773	83718	92878	88494	81608	78855	115278	74716	80299	93361
n	831.725	6.67425	16913	13650	19619	17277	11790	14879	14184	12928	20854	13702	12303	15609
n	656.423	6.66975	N.D.	N.D.	N.D.	N.D.	6526	7229	6435	N.D.	9662	N.D.	N.D.	N.D.
n	769.731	6.6755	71694	57400	63769	63945	70299	66912	64440	68591	87934	59768	60869	71861
n	648.667	6.67375	19337	14991	18712	16668	19463	16410	15235	15667	22264	14535	14666	17706
n	550.525	6.7202	N.D.	N.D.	8617	10382	N.D.	N.D.	9683	10037	11011	N.D.	N.D.	N.D.
n	354.345	6.67	N.D.	65845	N.D.	N.D.	14368	14236	N.D.	N.D.	33230	47966	46015	12492
n	551.489	6.73167	N.D.	N.D.	N.D.	N.D.	N.D.	N.D.	N.D.	N.D.	33291	27537	15004	N.D.
n	614.486	6.6525	N.D.	N.D.	N.D.	N.D.	N.D.	N.D.	N.D.	N.D.	7350	4690	N.D.	N.D.
n	970.606	6.73767	9510	6398	4702	8364	8325	8759	10203	6786	14498	8719	7039	7562
n	916.601	6.742	20594	20972	17465	24637	26220	27131	27557	20506	37123	24368	22967	22375
n	704.673	6.81454	1224965	946332	1087436	862386	1198850	908381	1101096	1128613	1251782	N.D.	1141910	988659
n	582.435	6.80157	N.D.	N.D.	180754	N.D.	22487	23055	22914	N.D.	28731	21859	N.D.	24223
n	787.68	6.84267	N.D.	N.D.	N.D.	N.D.	N.D.	N.D.	53630	43745	66765	N.D.	N.D.	N.D.
n	480.39	6.84683	19200	19376	21337	19438	19038	17676	19245	19623	22474	17716	18985	21174
n	942.207	6.9384	N.D.	248320	186702	308904	238856	255950	274312	263045	340936	N.D.	258373	259261
n	368.36	7.01189	49463	192758	N.D.	71608	49862	48391	51114	127681	178710	N.D.	88116	N.D.
n	675.483	7.04475	29267	23843	31334	31725	28938	29098	27217	32482	44239	36706	33497	25249
n	699.529	7.05492	685614	544779	686482	617823	576091	637227	581597	704399	761817	722439	674201	561593
n	781.53	7.05867	66371	63254	71749	64327	60467	68567	61004	68145	77972	72295	66002	61542
n	625.492	7.05575	57613	60809	71626	62698	58838	63927	62151	68632	58421	52788	68388	59472
n	737.472	7.04273	N.D.	9372	11454	9657	10705	9865	9056	10367	14496	12459	10040	10485
n	606.673	7.205	482721	506774	715210	779768	503336	714982	792472	N.D.	813852	744437	746741	N.D.
n	630.691	7.21208	709028	850221	1159908	1194962	687131	1146370	776261	751770	1552003	1145105	1143113	1201215
n	649.618	7.19186	27051	N.D.	N.D.	23818	N.D.	21464	N.D.	21222	26004	20349	N.D.	23781
n	863.945	7.2165	6485	N.D.	N.D.	N.D.	5935	6232	N.D.	N.D.	9432	7564	6169	N.D.
n	567.694	7.22217	14600000	18500000	20600000	20400000	19600000	19300000	17400000	17500000	23800000	20200000	20400000	20900000
n	657.724	7.22333	18264	22836	22683	23737	N.D.	22241	17439	18244	30366	N.D.	24719	N.D.
n	823.931	7.21758	109557	96670	97386	100229	94585	94086	98683	99041	131038	95374	96097	95481
n	851.962	7.21675	83023	68653	70374	75511	73495	69873	70010	73406	101198	76346	68056	72770
n	563.668	7.22809	28069	28312	27923	29695	24213	20118	29477	28095	35300	18176	N.D.	20015
n	566.688	7.2256	N.D.	7573977	N.D.	7749429	6686202	7521256	6628684	6788532	9603783	7707844	7752398	7864110
n	564.675	7.2259	237479	222274	225199	226948	219094	219592	193257	183544	279775	129329	N.D.	N.D.
n	565.682	7.228	1134015	1571114	N.D.	1612405	1340636	1557044	1347597	N.D.	2007661	1591037	1624414	N.D.
n	1223.38	7.22567	N.D.	N.D.	499336	N.D.	N.D.	N.D.	N.D.	N.D.	643733	N.D.	227709	N.D.
n	747.712	7.24033	3542778	3287098	3591681	3256561	3635437	3185965	3359219	3358892	3960685	3239725	3297647	3389216
n	912.724	7.247	N.D.	13070	N.D.	N.D.	N.D.	N.D.	N.D.	N.D.	16611	N.D.	12730	N.D.
n	905.697	7.24389	N.D.	9961	N.D.	10671	9699	9642	9932	10162	14047	9373	8492	N.D.
n	846.689	7.24167	N.D.	N.D.	N.D.	N.D.	18362	N.D.	N.D.	N.D.	21249	N.D.	17713	N.D.
n	829.717	7.24557	252596	N.D.	250420	N.D.	N.D.	229647	N.D.	235390	296576	N.D.	238310	244374
n	805.672	7.26075	N.D.	N.D.	N.D.	N.D.	N.D.	N.D.	N.D.	25363	30214	N.D.	25801	26071
n	1176.77	7.30125	32750	20944	17913	27997	25154	30537	30545	21597	45083	26106	22288	22621
n	1016.22	7.36427	325709	268001	267487	336881	279116	292860	294824	N.D.	368615	283756	280389	288964
[truncated: 291 more rows]
