# Supplementary material for: Altered ureido protein modification profiles in seminal plasma extracellular vesicles of non-normozoospermic men
Source: Front Endocrinol (Lausanne). 2023 Mar 22;14:1113824. doi: 10.3389/fendo.2023.1113824 (PMC10073716; doi:10.3389/fendo.2023.1113824)
Supplement: Supplementary file 3 [file Table_3.xlsx]

## Sheet: Carbamylated peptides
Altered ureido protein modifications profiles in seminal plasma extracellular vesicles of non-normozoospermic men
Rosa Roy1, Cristina Lorca 2,3, María Mulet 2,3, Jose Antonio Sánchez Milán 2, Alejandro Baratas 1, Moisés de la Casa 1,4, Carme Espinet 5, Aida Serra 2, 3,5*and Xavier Gallart-Palau 2, 6*
1 Department of Biology. Genetics Unit. Universidad Autónoma de Madrid. Cantoblanco, 28049, Madrid, Spain
2 Biomedical Research Institute of Lleida Dr. Pifarré Foundation (IRBLLEIDA) - +Pec Proteomics Research Group (+PPRG) - Neuroscience Area – University Hospital Arnau de Vilanova (HUAV), 80 Av. Rovira Roure, 25198, Lleida, Spain
3 IMDEA-Food Research Institute, Campus of International Excellence UAM+CSIC, Old Cantoblanco Hospital, 8 Crta. Canto Blanco, 28049, Madrid, Spain
4 GINEFIV, Assisted Reproduction Centre, Madrid, Spain
5 Department of Medical Basic Sciences, University of Lleida (UdL), 25198, Lleida, Spain
6 Department of Psychology, University of Lleida (UdL), 25001, Lleida, Spain
*Co-senior authorship & correspondence.
Dataset S2: List of carbamylated peptides identified by iTraq-quantitative liquid chromatography tandem mass spectrometry in sEVs from NZ (NZ 1-3) and non-NZ (non-NZ 1-5). For every sEVs sample analyzed intensity and ratio iTraq calculated based on NZ1 is included.
									Intensity									Ratio iTraq
Protein Accession	Peptide	-10lgP	Quality Score	Mass	ppm	m/z	RT	#Feature	NZ1	NZ2	NZ3	nonNZ1	nonNZ2	nonNZ3	nonNZ4	nonNZ5		NZ1	NZ2	NZ3	non-NZ1	non-NZ2	non-NZ3	non-NZ4	non-NZ5	Start	End	PTM	AScore
Q00796|DHSO_HUMAN	M.A(+304.20)AAAK(+43.01)PNNLSLVVHGPGDLR.L	40.59	9.42	2346.3	2.8	783.11	139.92	4	43735	43939	49268	43531	48158	41403	48403	55389		1	1	1.13	1	1.1	0.95	1.11	1.27	2	21	iTRAQ 8plex (K N-term); Carbamylation	A1:iTRAQ 8plex (K N-term):1000.00;K5:Carbamylation:0.00
tr|K7EM38|K7EM38_HUMAN	R.V(+304.20)APEEHPVLLTEAPLNPK(+43.01)AVL.S	47.25	10.82	2583.45	6.9	646.875	134.4	2	26674	30034	26493	31874	29615	38947	24436	26312		1	1.13	0.99	1.19	1.11	1.46	0.92	0.99	96	116	iTRAQ 8plex (K N-term); Carbamylation	V1:iTRAQ 8plex (K N-term):1000.00;K18:Carbamylation:116.26
P78371|TCPB_HUMAN	R.E(+304.20)AESLIAK(+43.01)K(+304.20).I	24.13	6.8	1638.97	15.5	547.338	121.98	0	28322	24608	27592	27004	26168	26249	31652	36148		1	0.87	0.97	0.95	0.92	0.93	1.12	1.28	112	120	iTRAQ 8plex (K N-term); Carbamylation	E1:iTRAQ 8plex (K N-term):1000.00;K8:Carbamylation:17.01;K9:iTRAQ 8plex (K N-term):1000.00
Q92538|GBF1_HUMAN	R.S(+304.20)EDTTGPITGLALTSVNK(+43.01)FL.S	25.79	6.13	2410.28	16.9	804.449	151.61	0	4932.5	5032.1	3852.9	5027.1	5146	4220.5	4306.4	4273.3		1	1.02	0.78	1.02	1.04	0.86	0.87	0.87	74	93	iTRAQ 8plex (K N-term); Carbamylation	S1:iTRAQ 8plex (K N-term):1000.00;K18:Carbamylation:53.68
